# Supplementary material for: Development of certain benzylidene coumarin derivatives as anti-prostate cancer agents targeting EGFR and PI3Kβ kinases
Source: PubMed Central journal article supplement — J Enzyme Inhib Med Chem. 2024 Feb 13;39(1):2311157. doi: 10.1080/14756366.2024.2311157 (PMC10866054; doi:10.1080/14756366.2024.2311157), 2024-02-13
Supplement: IENZ_A_2311157_SM9126.pdf [file IENZ_A_2311157_SM9126.pdf]

**Development of Certain Benzylidene Coumarin Derivatives as Anti-Prostate Cancer Targeting EGFR and PI3K $\beta$  Kinases**

Lina M. A. Abdel Ghany <sup>a</sup>, Tarek S. Ibrahim <sup>b</sup>, Abdulrhman S. Alharbi <sup>c</sup>, Mohamed S. Abdel-Aziz <sup>d</sup>, Eman M. El-labbad <sup>e, f</sup>, Mohamed Elagawany <sup>g, \*</sup>, Noha Ryad <sup>h</sup>

<sup>a</sup> *Pharmaceutical Chemistry Department, College of Pharmaceutical Sciences and Drug Manufacturing, Misr University for Science and Technology, 6th of October City, Giza, P.O. Box 77, Egypt. (<https://orcid.org/0000-0003-3884-8755>)*

<sup>b</sup> *Department of Pharmaceutical Chemistry, Faculty of Pharmacy, King Abdulaziz University, Jeddah 21589, Saudi Arabia. (<https://orcid.org/0000-0002-3049-4617>)*

<sup>c</sup> *Department of Chemistry, College of Science and Humanities–Dawadmi, Shaqra University, Saudi Arabia.*

<sup>d</sup> *Microbial Chemistry Department, Biotechnology Research Institute, National Research Centre, Cairo, Egypt.*

<sup>e</sup> *Department of Pharmaceutical Sciences, College of Pharmacy, Gulf Medical University, Ajman P.O. Box 4184, United Arab Emirates.*

<sup>f</sup> *Pharmaceutical Chemistry Department, Faculty of Pharmacy, Ain Shams University, Abbassia, Cairo 11566, Egypt*

<sup>g</sup> *Department of Pharmaceutical Chemistry, Damanhour University, Damanhour, Buhaira, Egypt.*

<sup>h</sup> *Pharmaceutical Organic Chemistry Department, College of Pharmaceutical Sciences and Drug Manufacturing, Misr University for Science and Technology, 6th of October City, Giza, P.O. Box 77, Egypt. (<https://orcid.org/0000-0001-8813-5185>)*

---

\* Corresponding author

Mohamed Elagawany

**Email:** elagawany@pharm.dmu.edu.eg

## Supplementary data:

The data are divided into three parts, experimental part and spectral data ( $^1\text{H}$ NMR,  $^{13}\text{C}$  NMR and MS) of the synthesized compounds, the biological studies and the docking studies.

### Part 1:

#### **A: Experimental part:**

The starting materials 1a-c, 2a-c and 3a-c were synthesized according adopted procedures at literatures. <sup>1-6</sup>

#### **General procedure for synthesis of 4-methyl-7-hydroxy-3,8-substituted-2H-1-chromene-2-ones (1a-c).**

A cooled mixture of resorcinol or 2-methylresorcinol (0.1 mol) and ethyl 2-ethylacetoacetate or ethyl 2-benzylacetoacetate (0.1 mol) was slowly added with stirring to cooled concentrated sulphuric acid (50 mL) in an ice bath over 90 min. The mixture was left overnight in the refrigerator then poured onto ice. The formed precipitate was filtered, dried and recrystallized from isopropanol to afford compounds **1a-c** in good yield.

#### **General procedure for synthesis of 2-(4-methyl-3,8-disubstituted-2-oxo-2H-chromen-7-yl)oxyacetate (2a-c).**

A mixture of the appropriate chromen-2-one derivative **1a-c** (0.1 mol), anhydrous potassium carbonate (27.64 g, 0.2 mol) and ethyl chloroacetate (14.64 g, 0.12 mol) in dry acetone (200 mL) was heated under reflux with stirring for 24 h. After cooling the reaction mixture, the formed precipitate was filtered and washed with acetone. The crude product was crystallized from ethanol to give compounds **2a-c**.

#### **General procedure for synthesis of 2-(4-methyl-3,8-disubstituted -2-oxo-2H-chromen-7-yl)oxyacetohydrazide (3a-c).**

A mixture of the appropriate ester derivative **2a-c** (0.01 mol) and hydrazine hydrate 99% (1 mL, 0.02 mol) in absolute ethanol (30 mL) was heated under reflux for 2 h. The precipitate was

filtered, washed with water and dried. The crude product was crystallized from acetic acid to give compounds **3a-c**

### B: Spectral data:

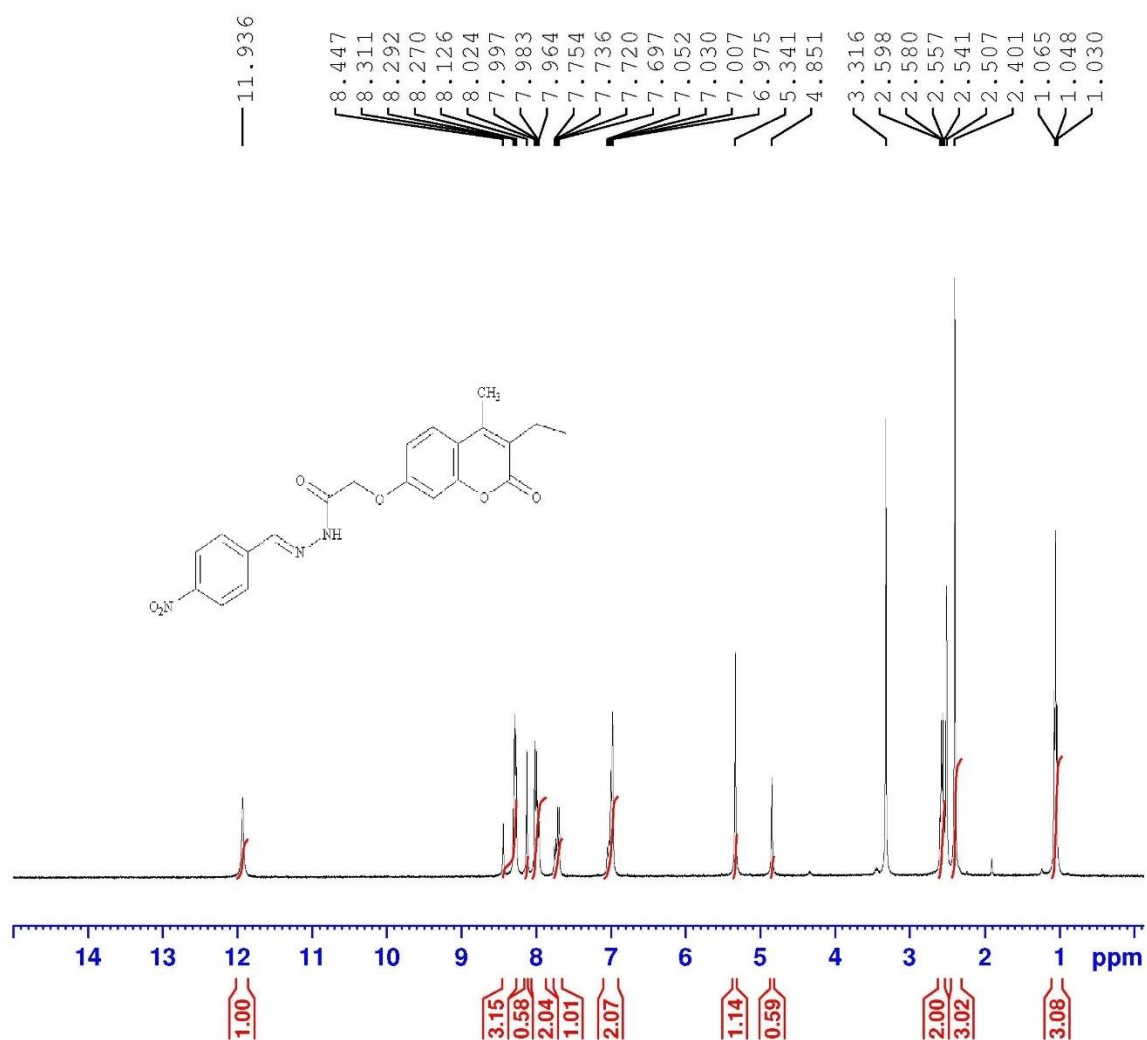

**Figure S1:** <sup>1</sup>H NMR spectrum of the compound **4a**.

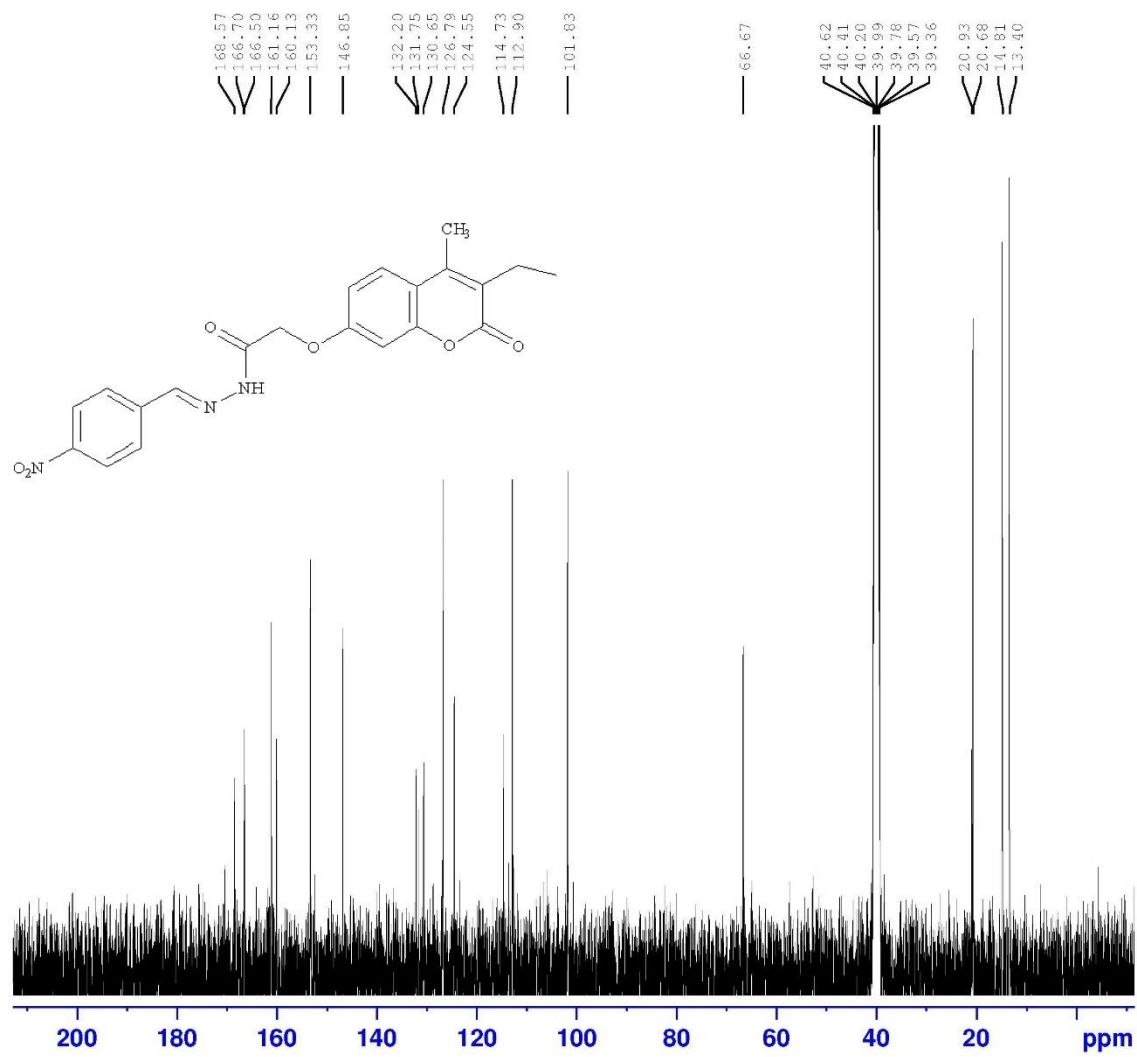

Figure S2: <sup>13</sup>C NMR spectrum of the compound 4a.

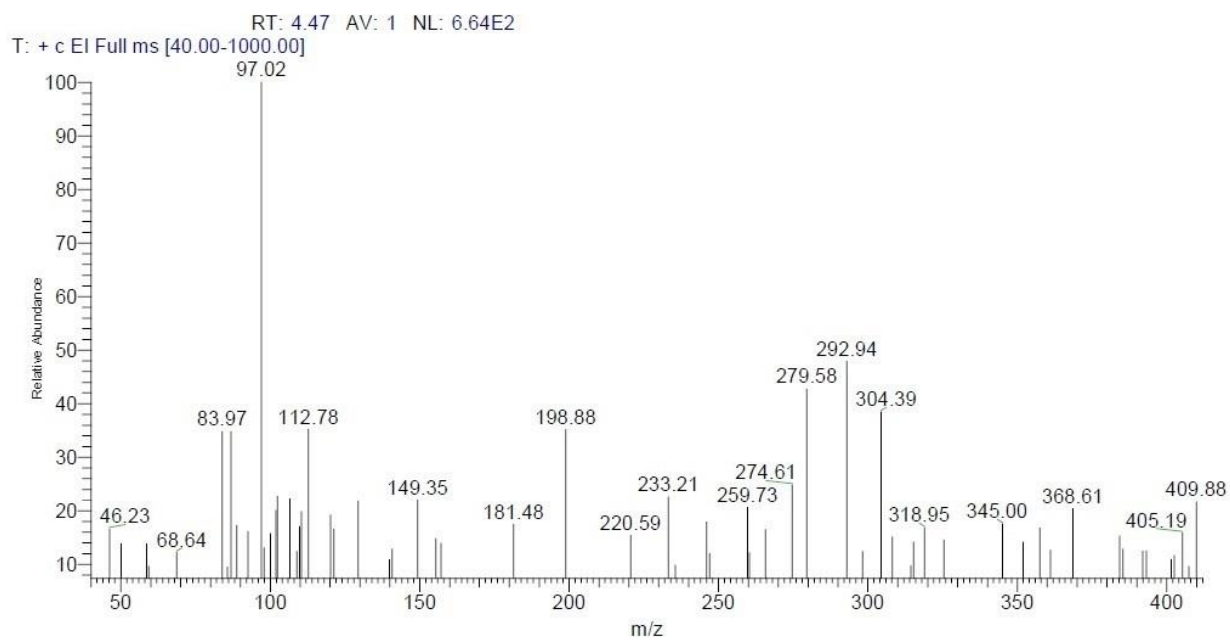

**Figure S3:** MS of the compound **4a**.

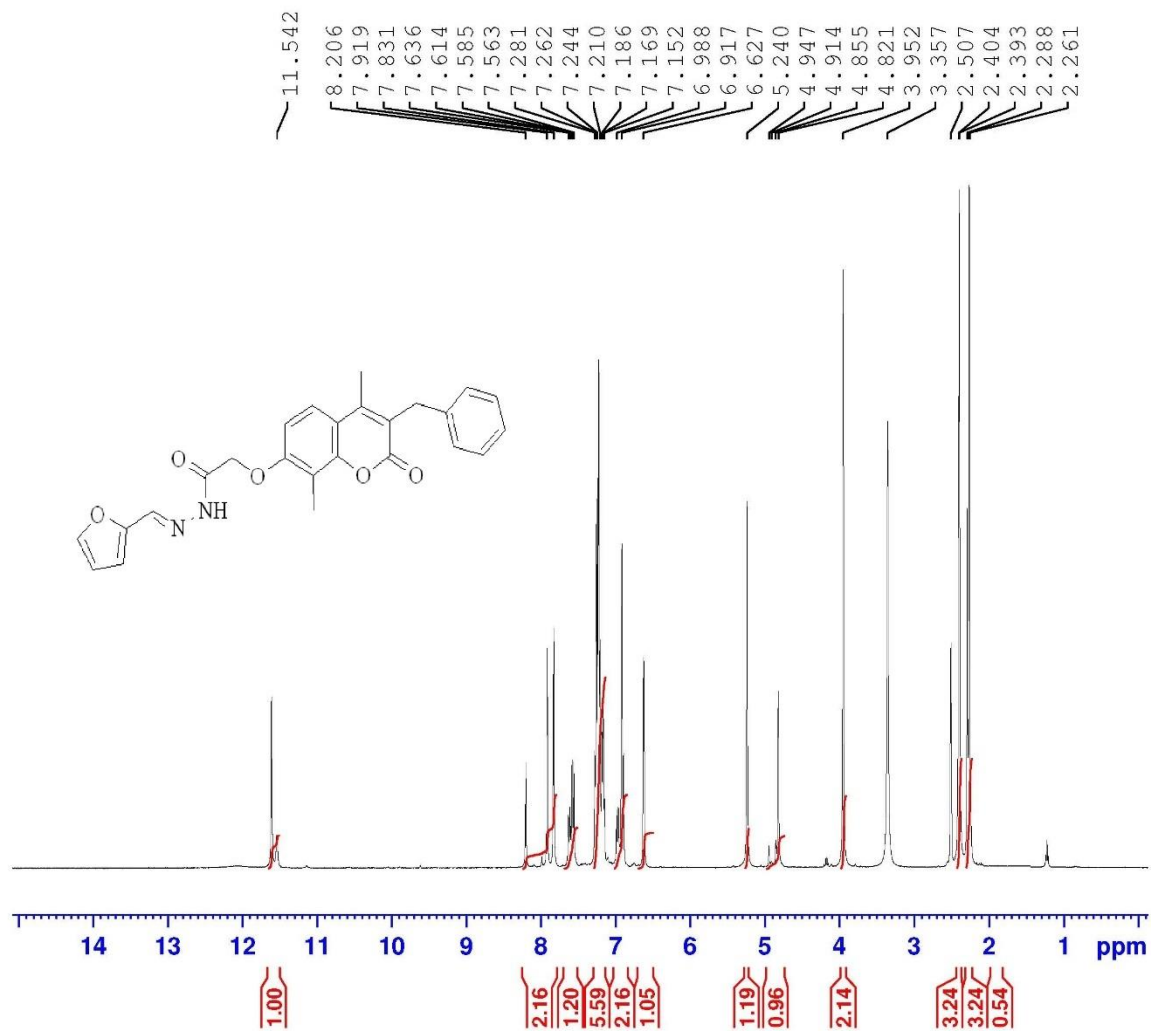

**Figure S4:** <sup>1</sup>H NMR spectrum of the compound **4b**.

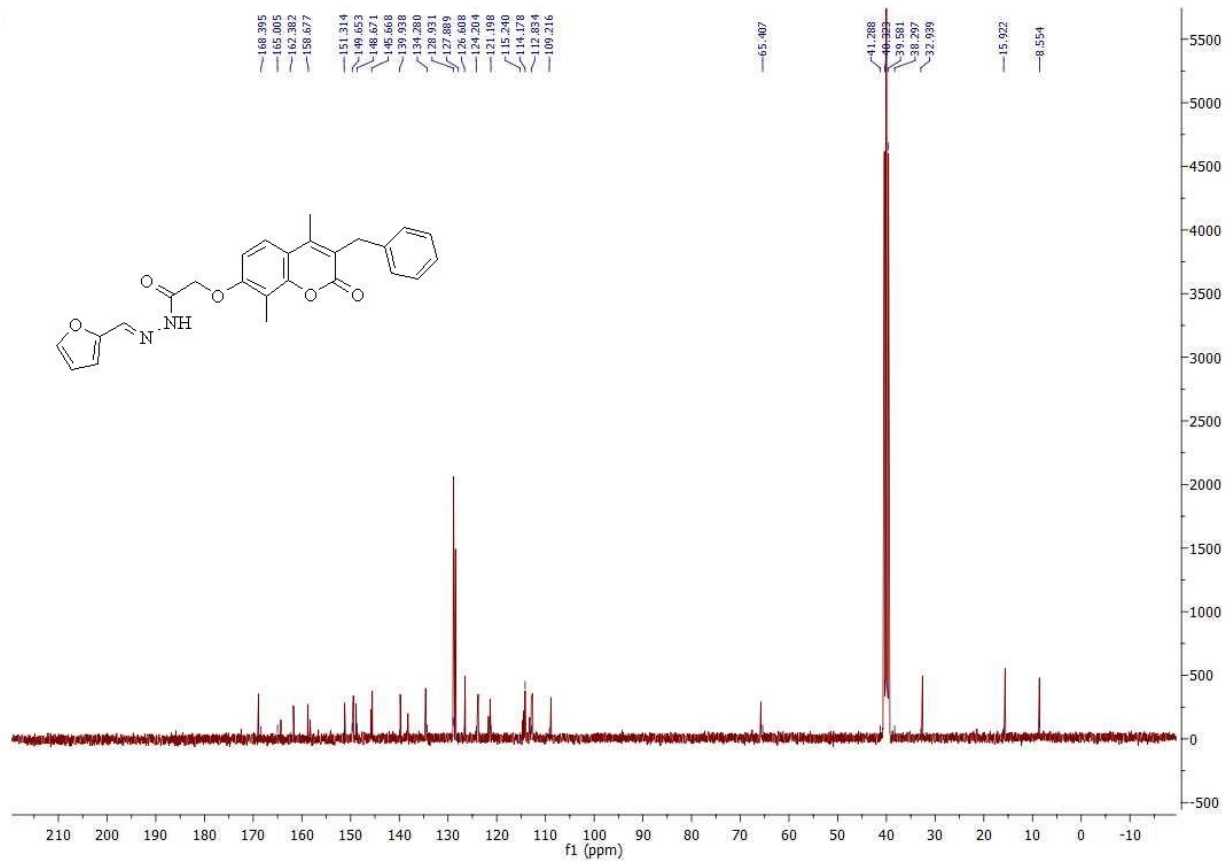

Figure S5: <sup>13</sup>C NMR spectrum of the compound **4b**.

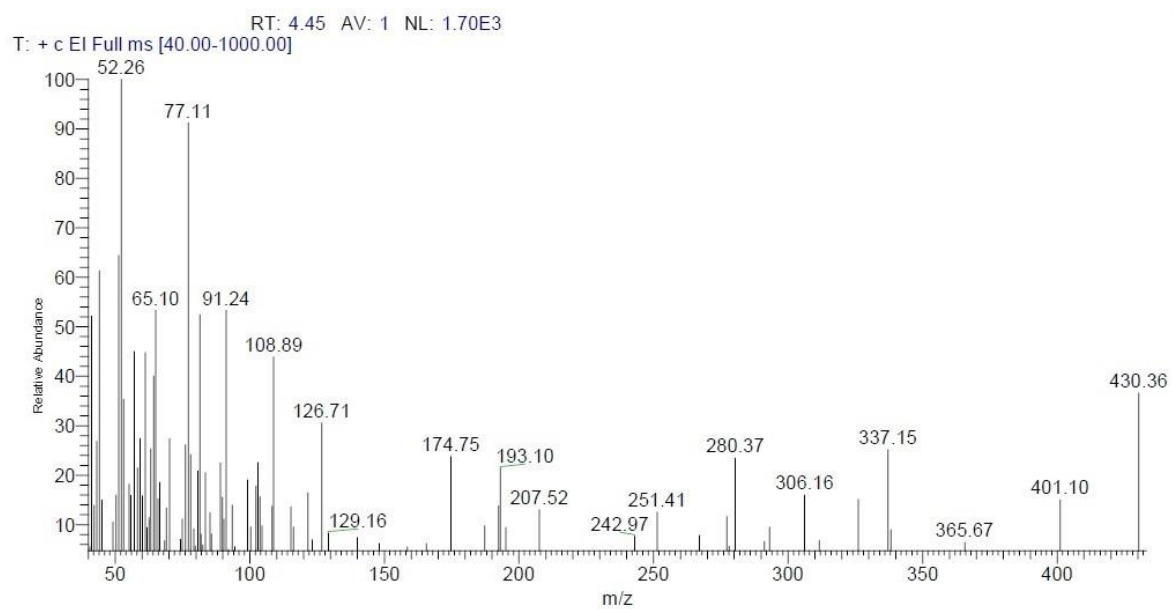

**Figure S6:** MS of the compound **4b**.



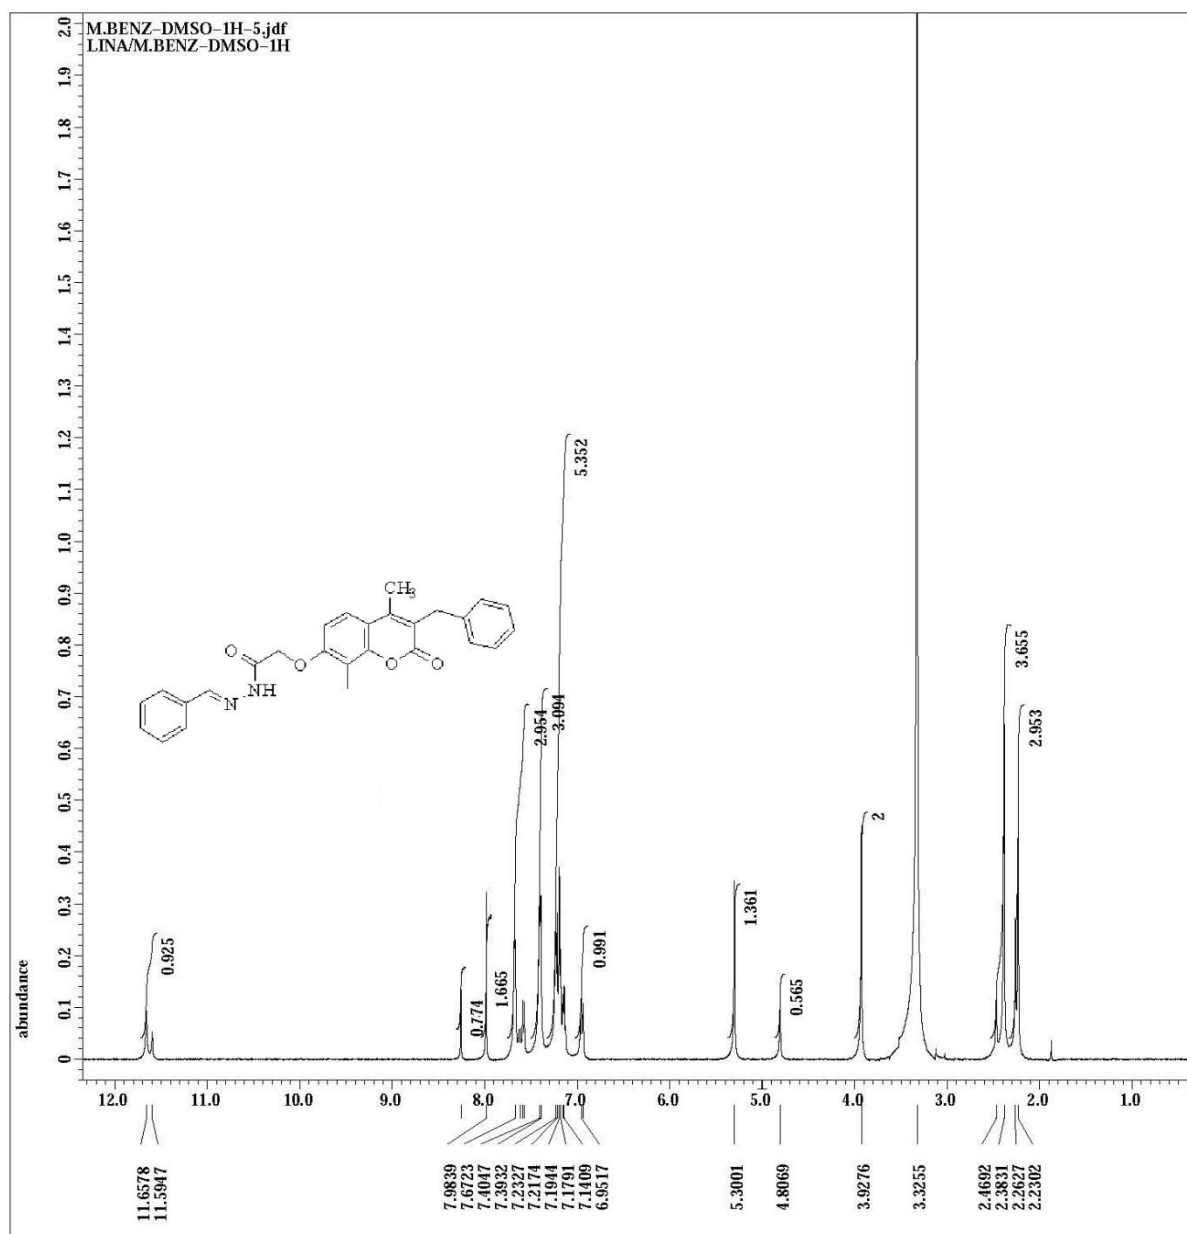

Figure S7:  $^1\text{H}$  NMR spectrum of the compound 4c.

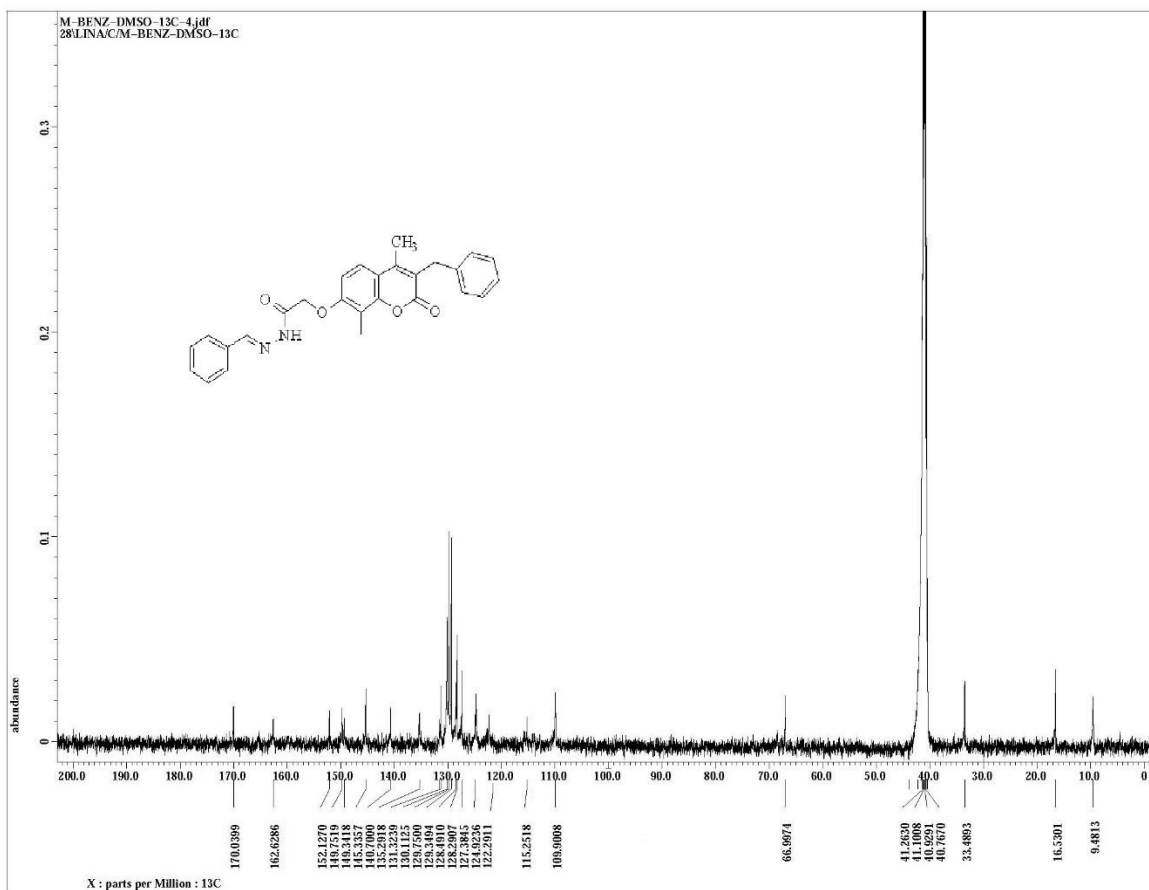

**Figure S8:**  $^{13}\text{C}$  NMR spectrum of the compound **4c**.

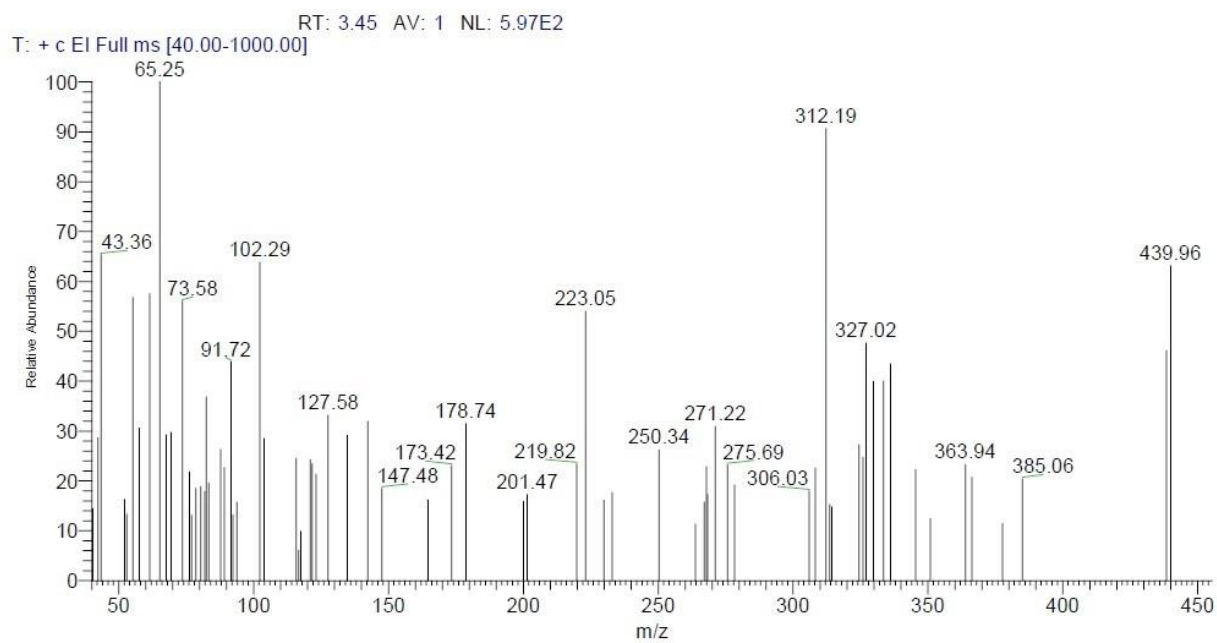

**Figure S9:** MS of the compound **4c**.

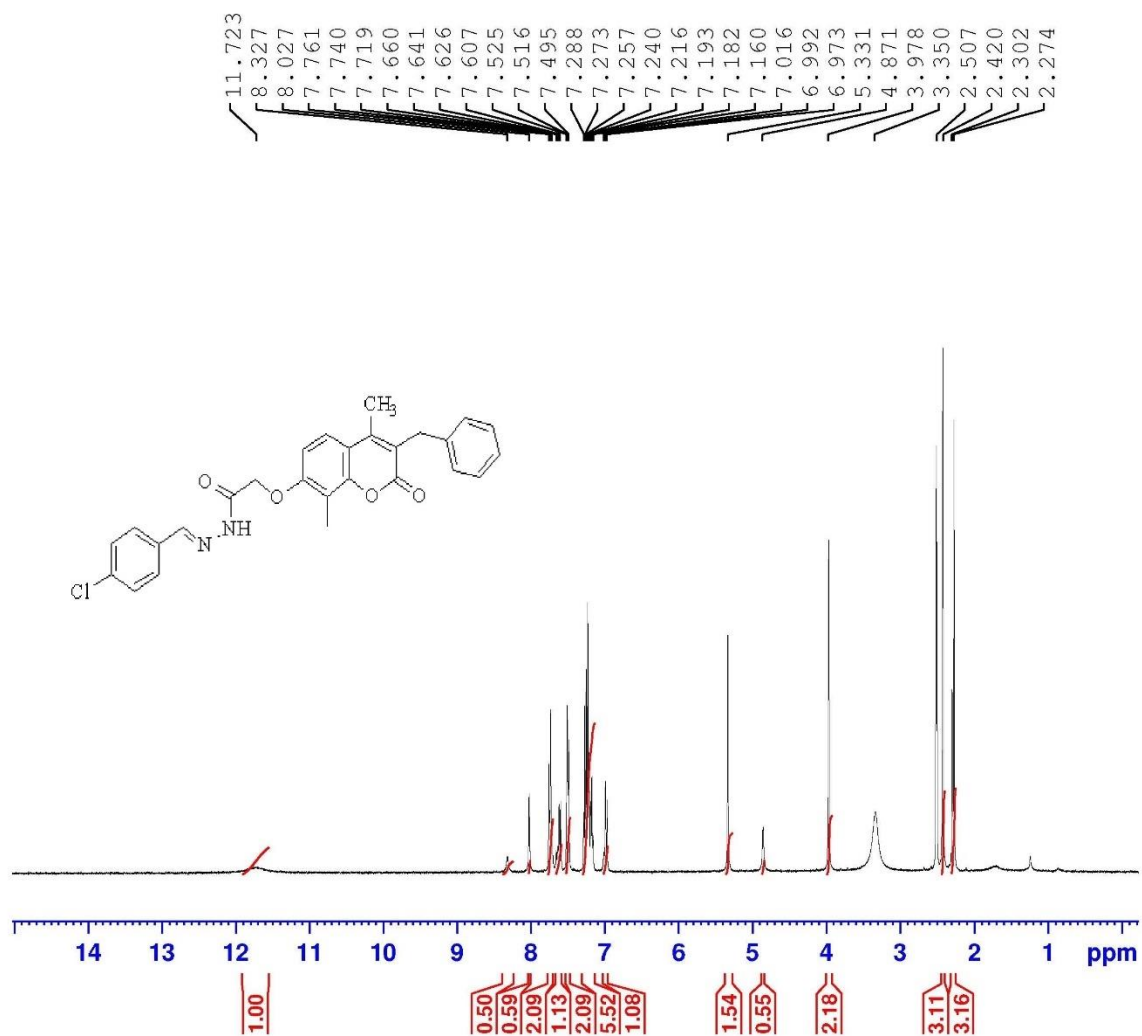

**Figure S10:** <sup>1</sup>H NMR spectrum of the compound **4d**.

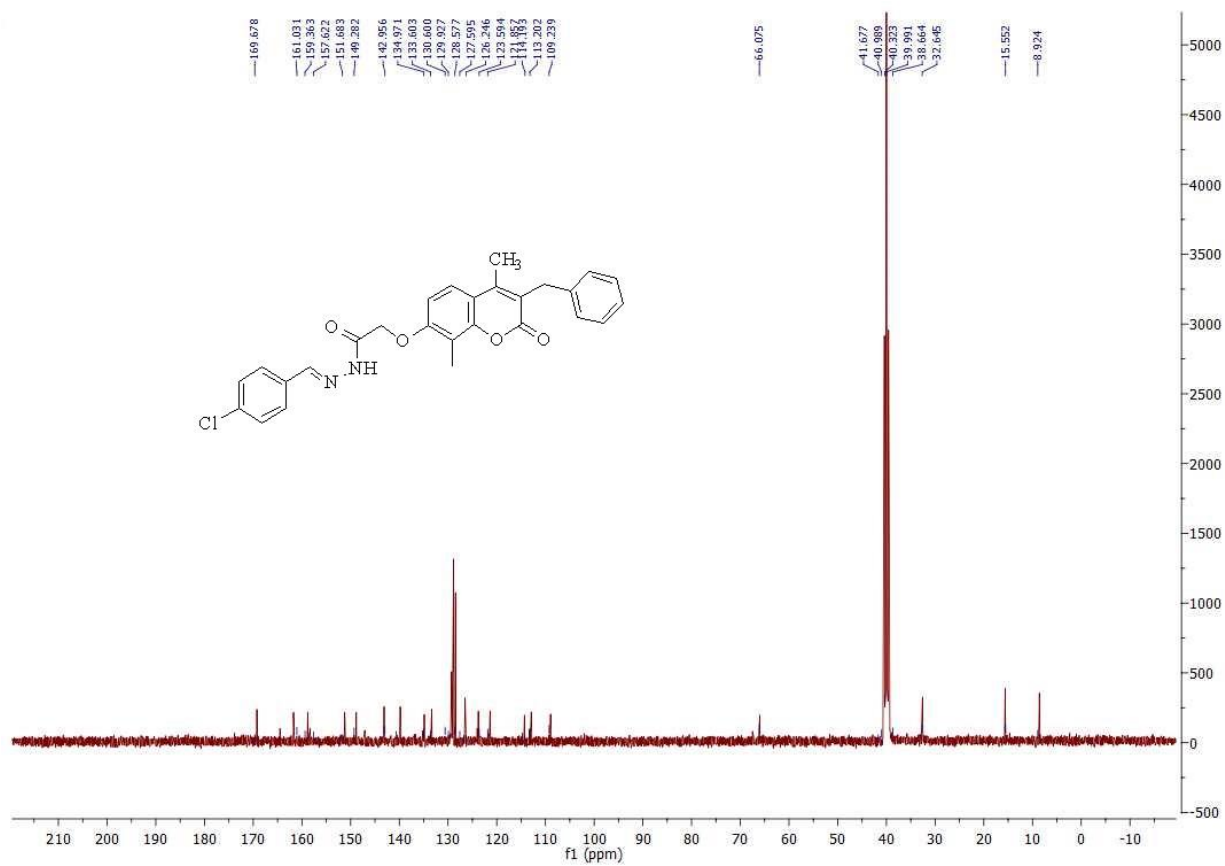

**Figure S11:**  $^{13}\text{C}$  NMR spectrum of the compound **4d**.

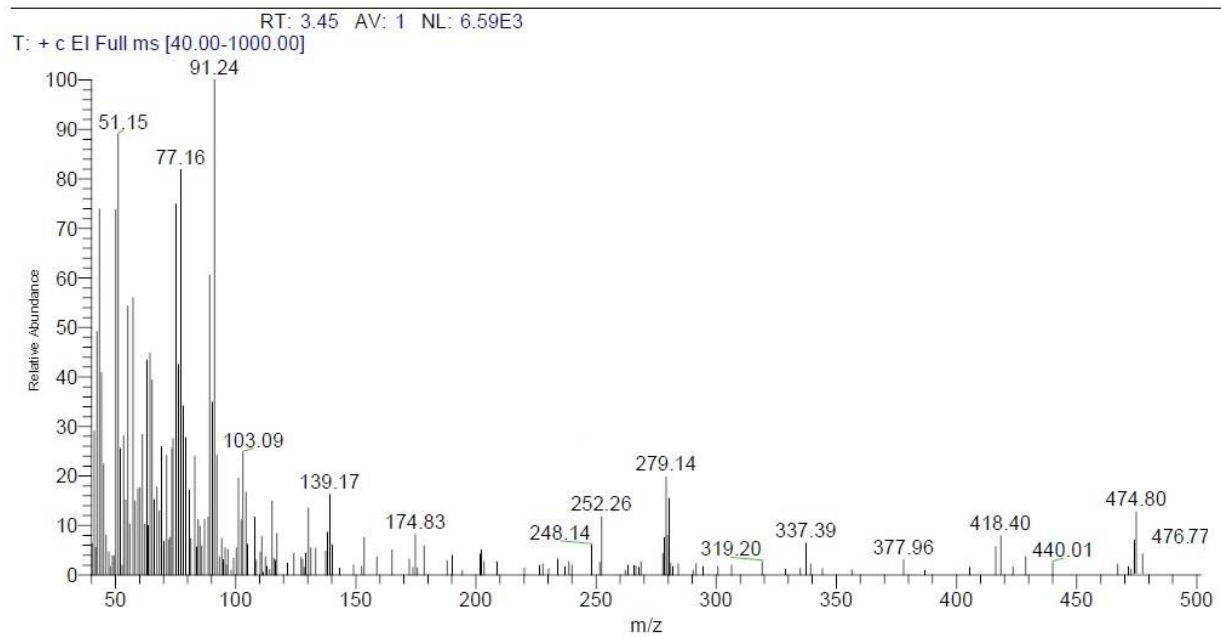

**Figure S12:** MS of the compound **4d**.

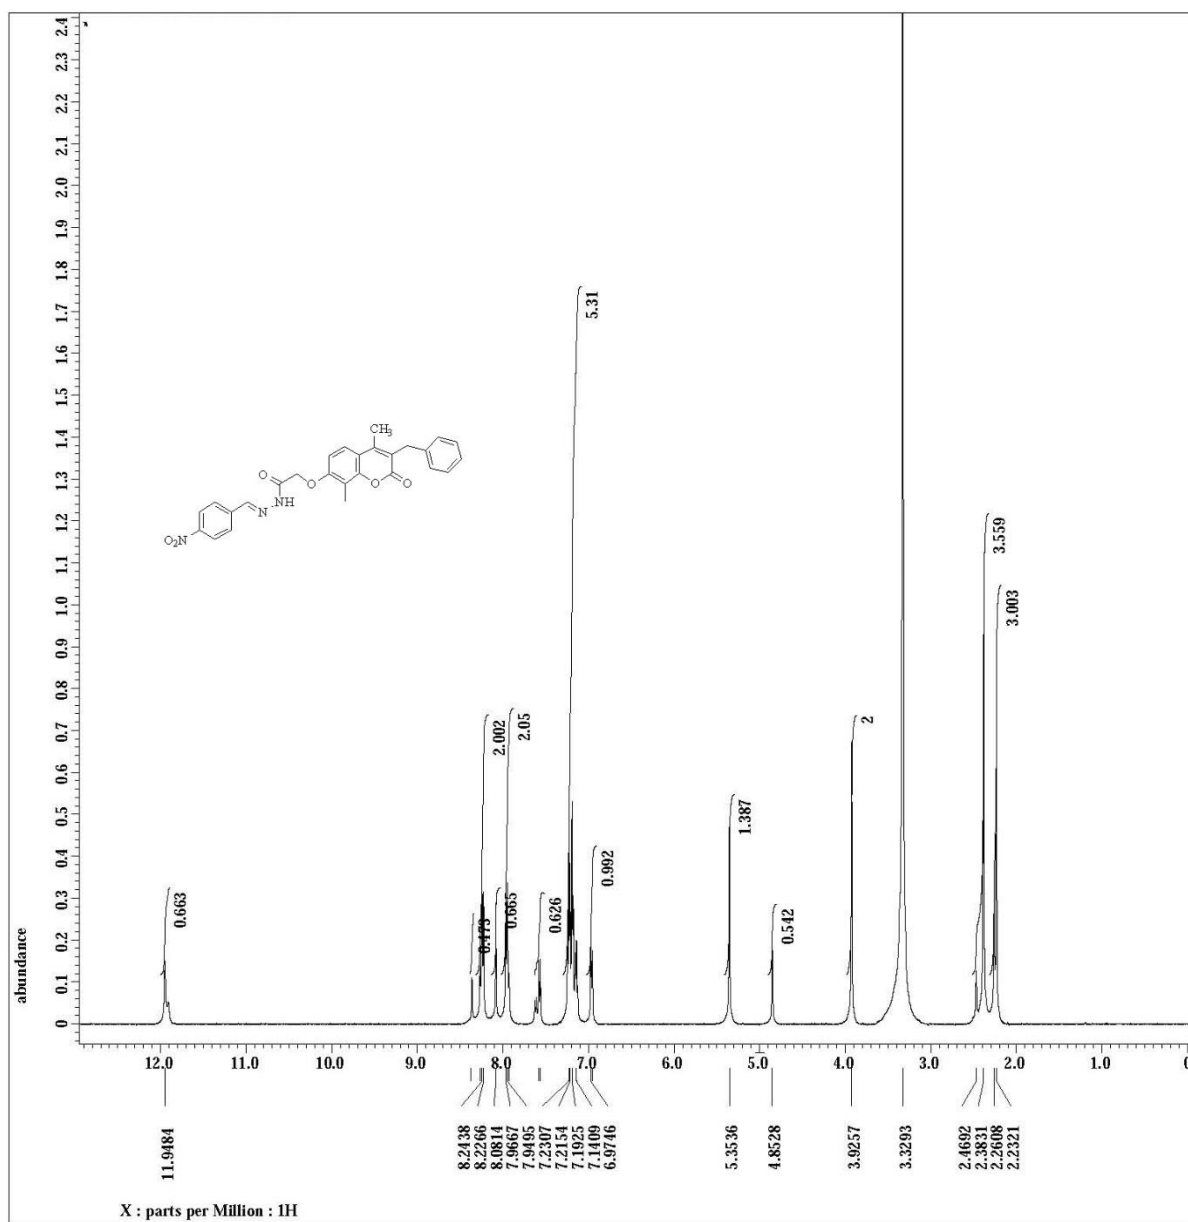

Figure S13: <sup>1</sup>H NMR spectrum of the compounds 4e.

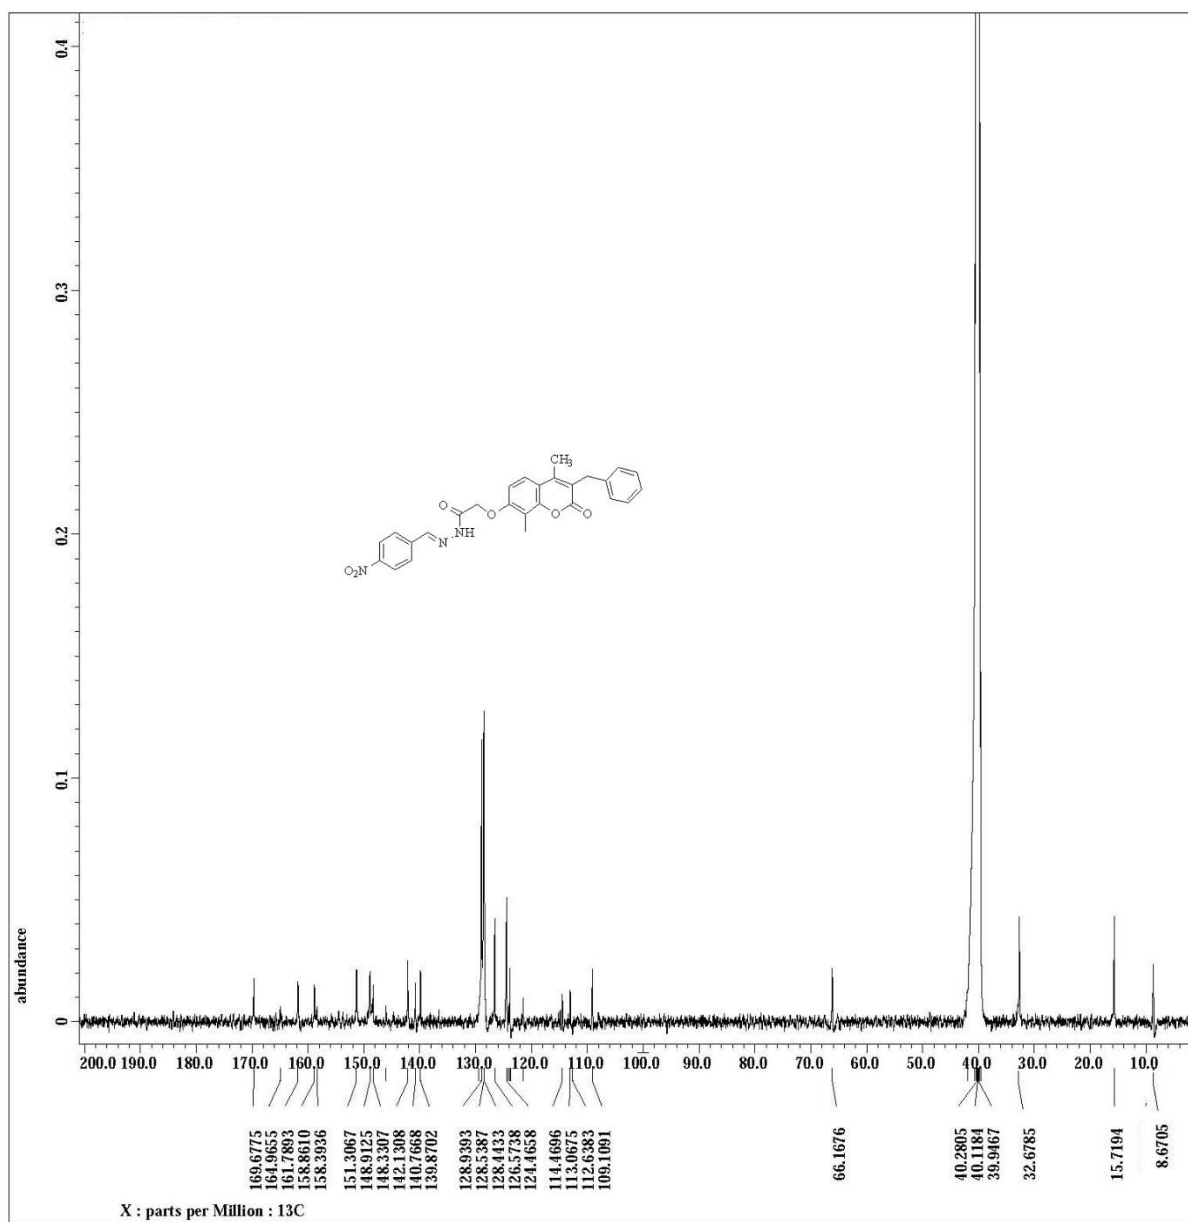

Figure S14:  $^{13}\text{C}$  NMR spectrum of the compound 4e.



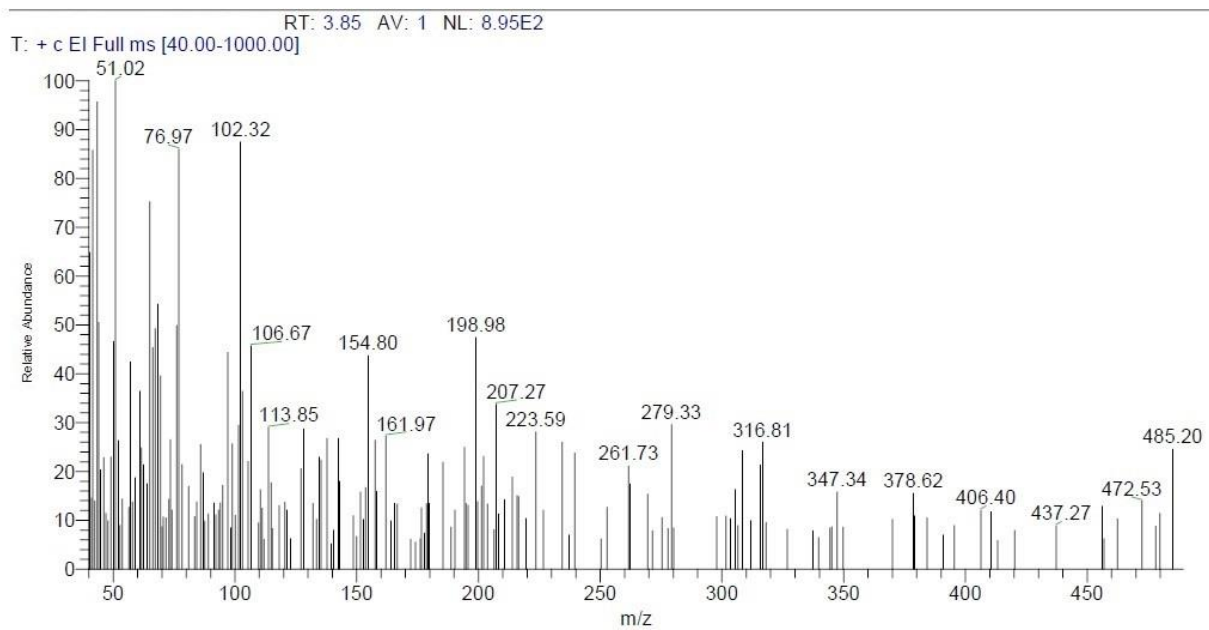

**Figure S15:** MS of the compound **4e**.

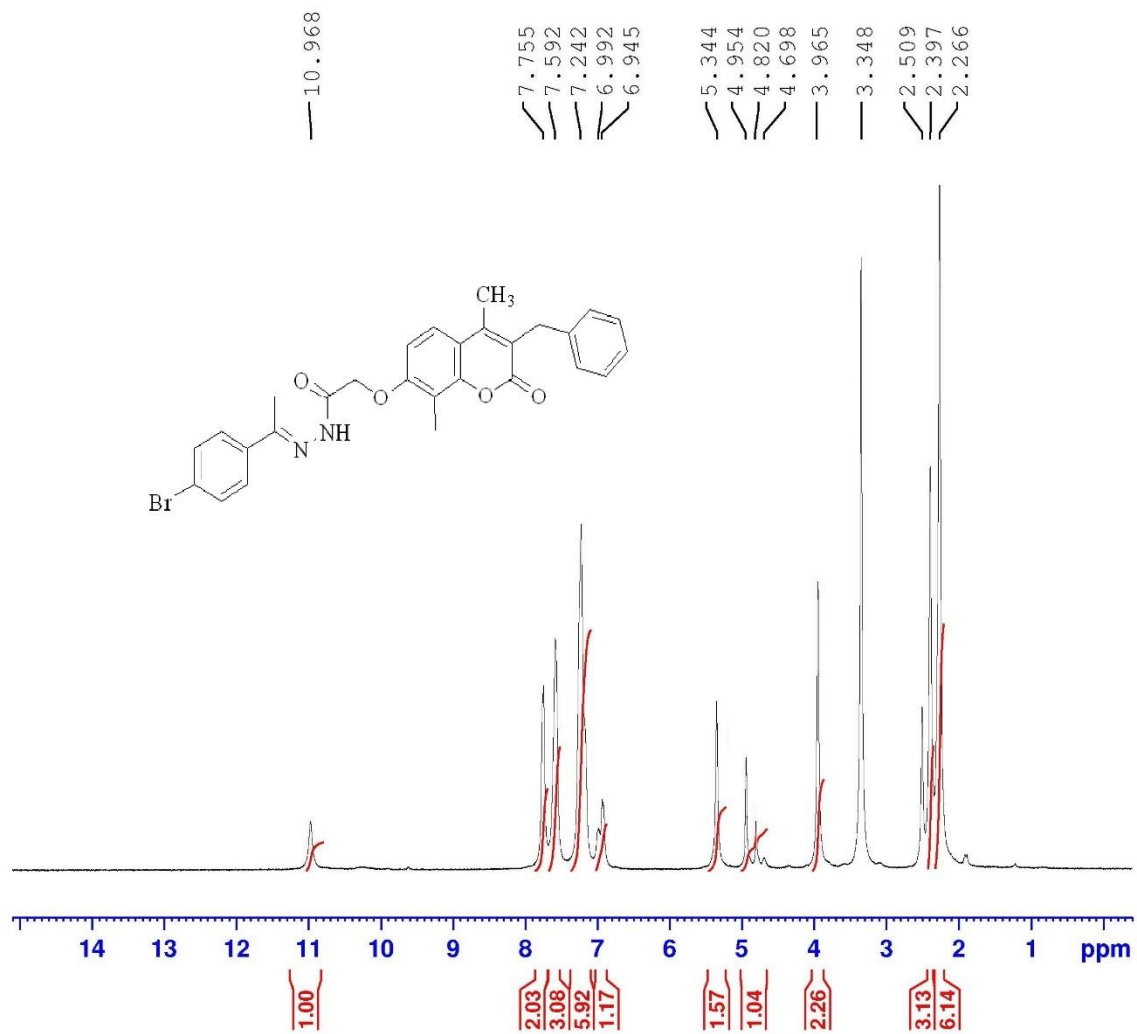

**Figure S16:** <sup>1</sup>H NMR spectrum of the compound 5.

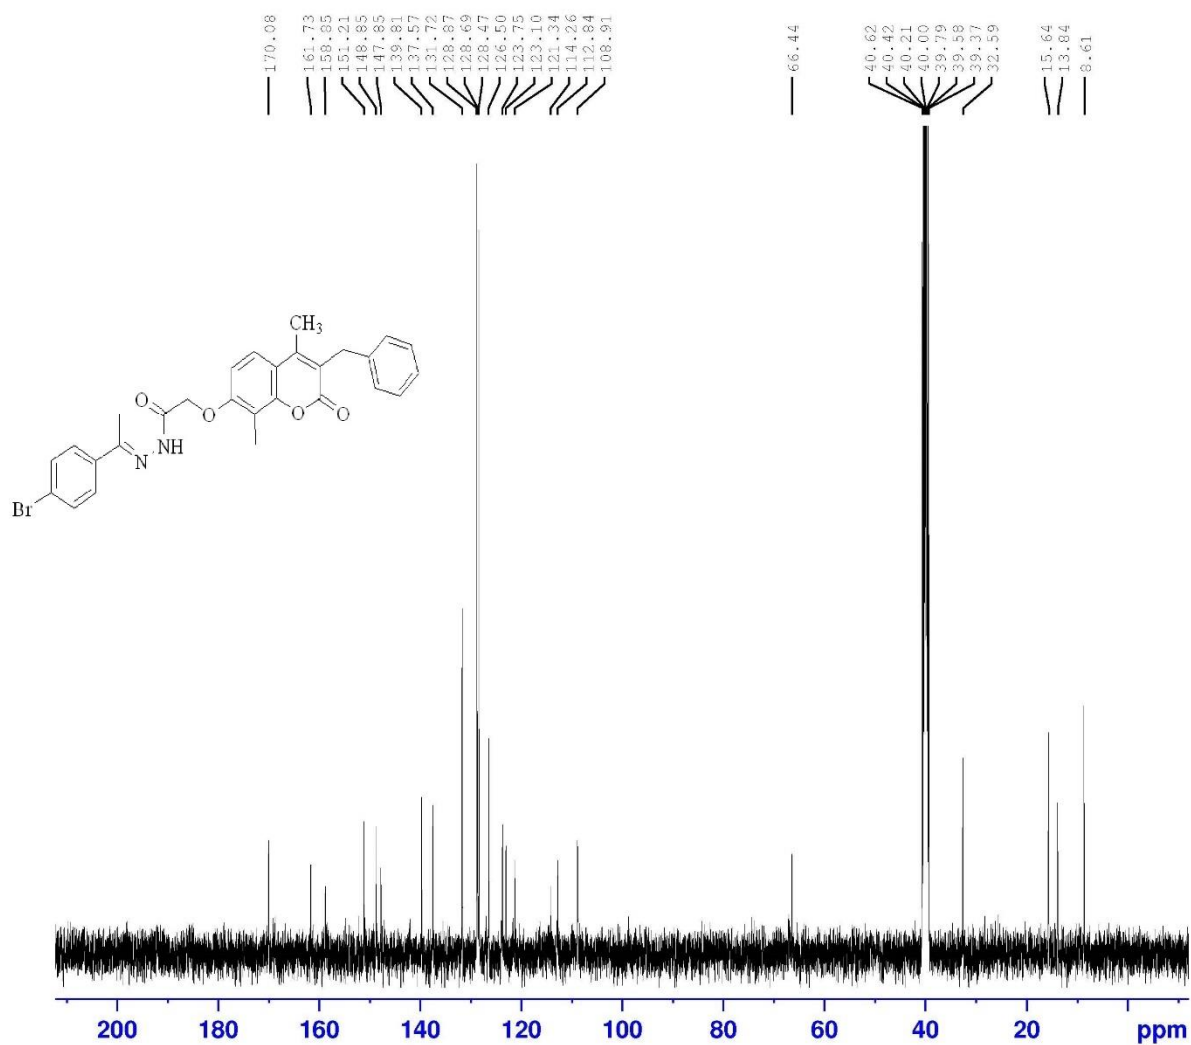

**Figure S17:** <sup>13</sup>C NMR spectrum of the compound 5.

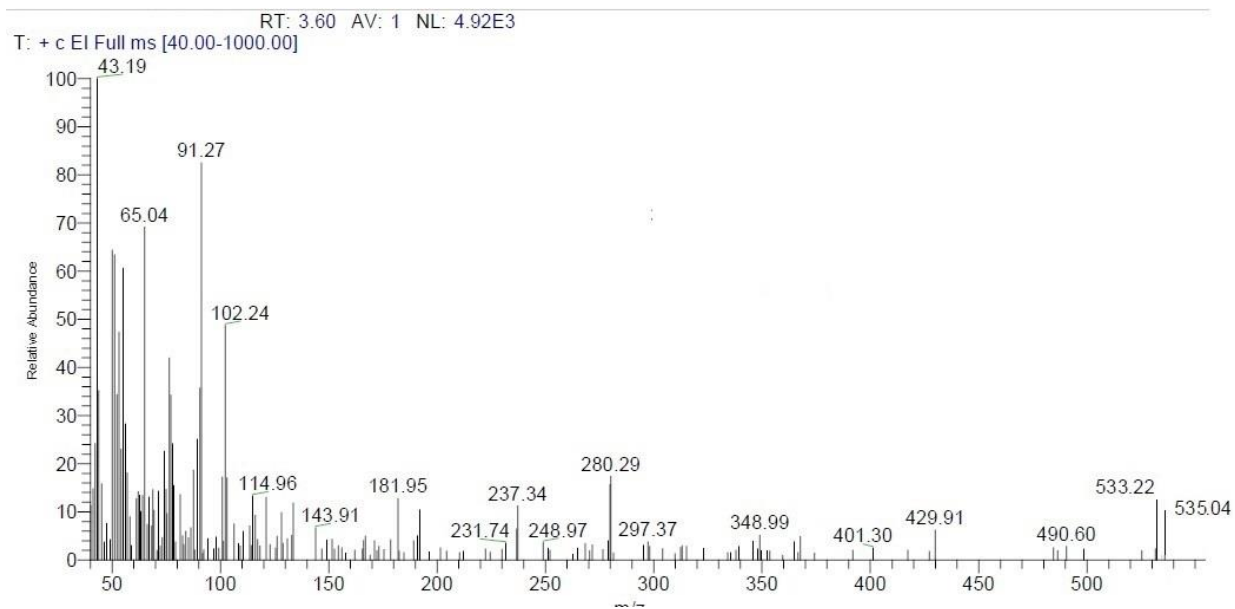

**Figure S18:** MS of the compound 5.

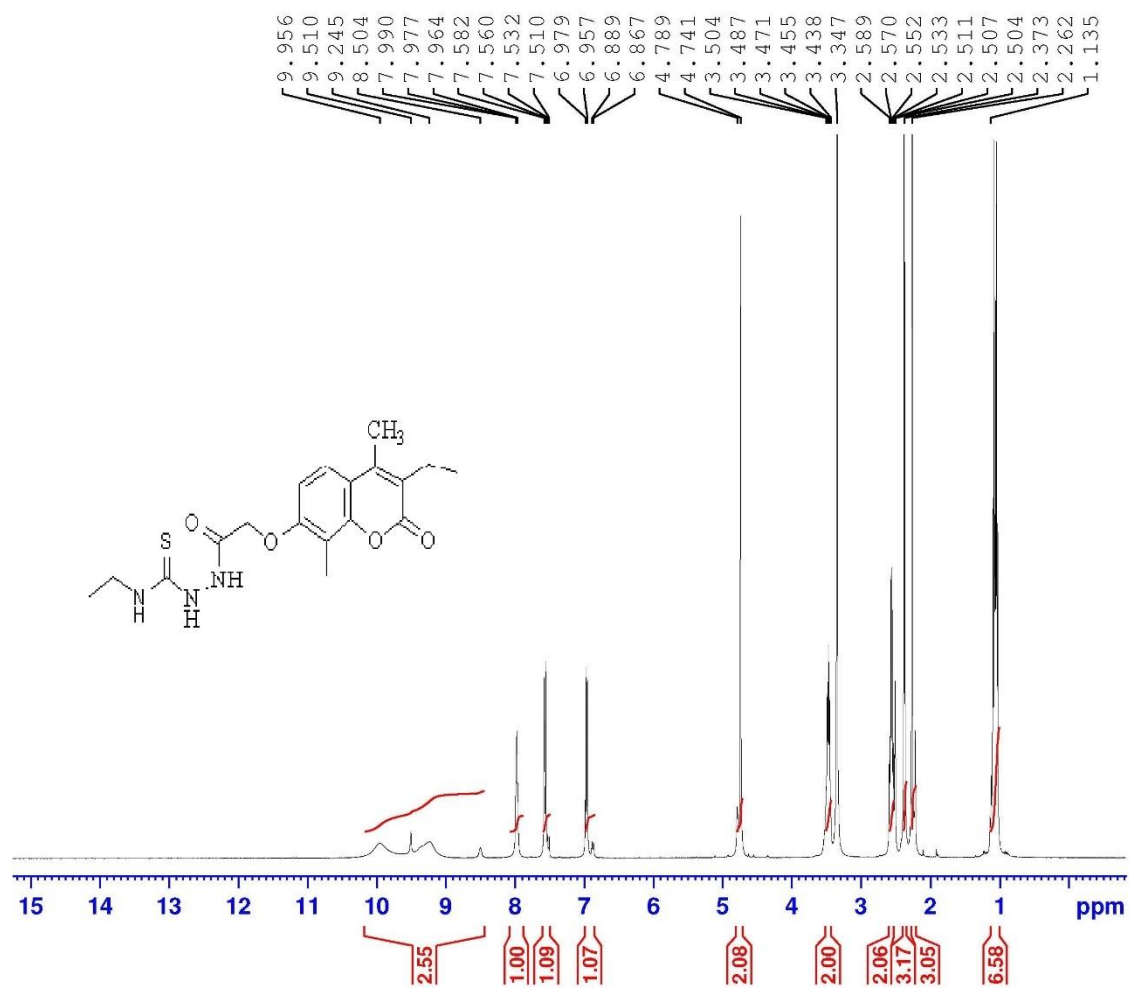

**Figure S19:** <sup>1</sup>H NMR spectrum of the compound 6a.

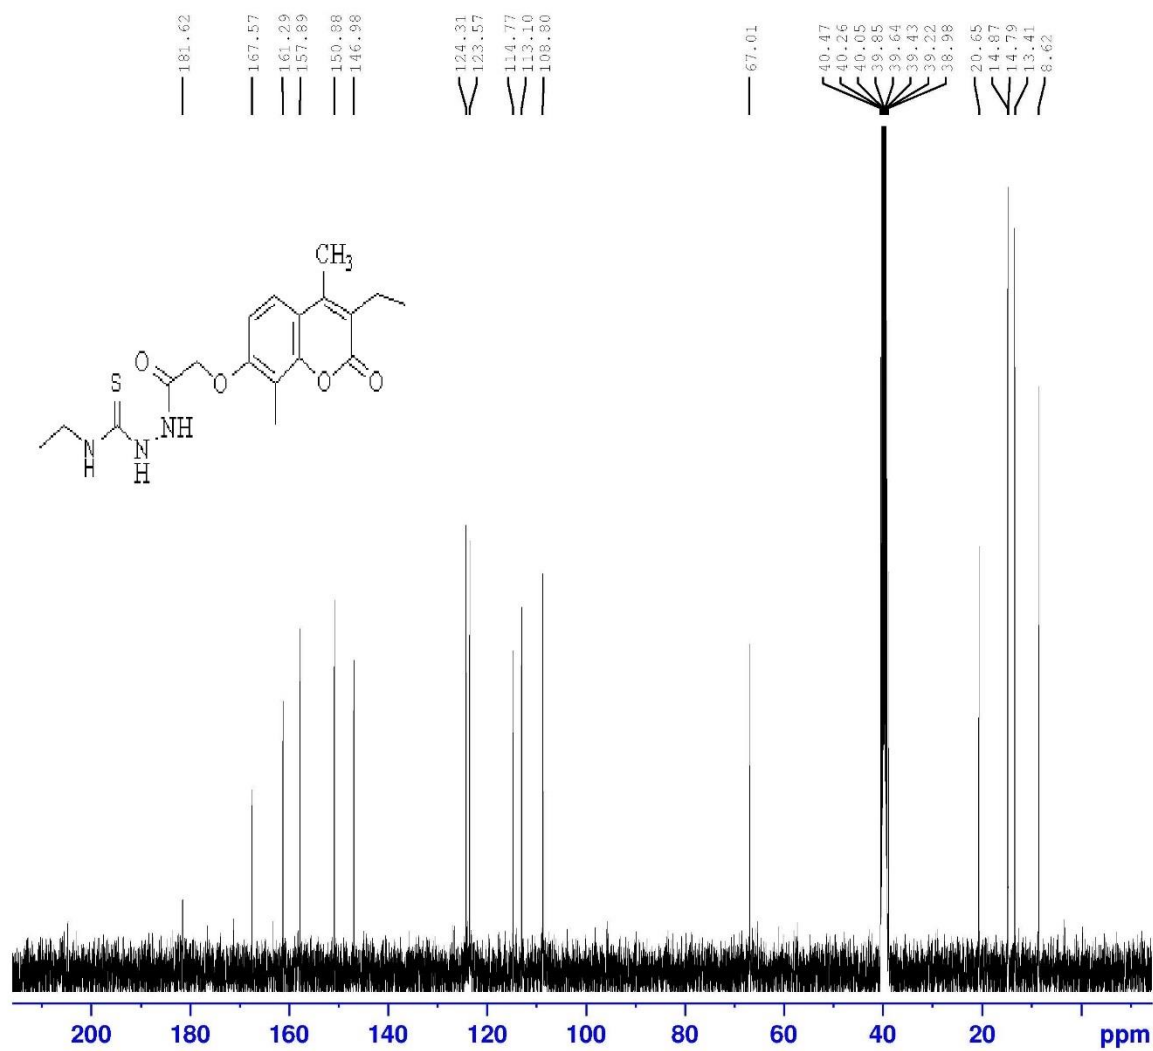

Figure S20:  $^{13}\text{C}$  NMR spectrum of the compound 6a.

RT: 2.86 AV: 1 SB: 2 0.67, 0.70 NL: 5.32E3  
T: {0,0} + cEI Full ms [40.00-1000.00]

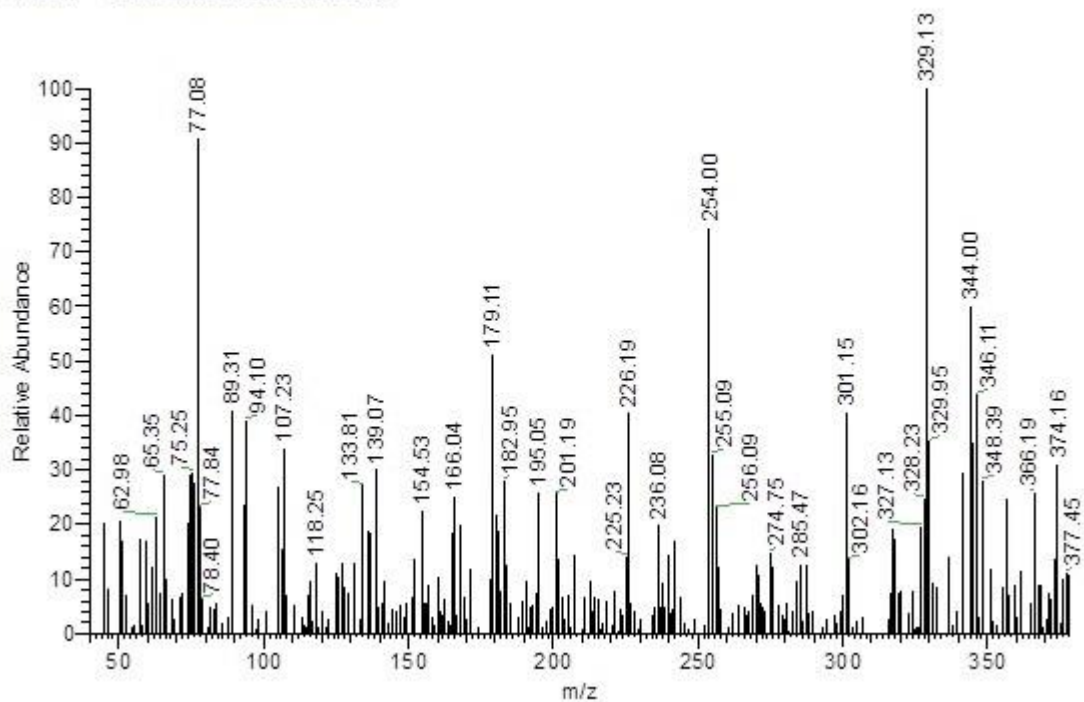

Figure S21: MS of the compound 6a.

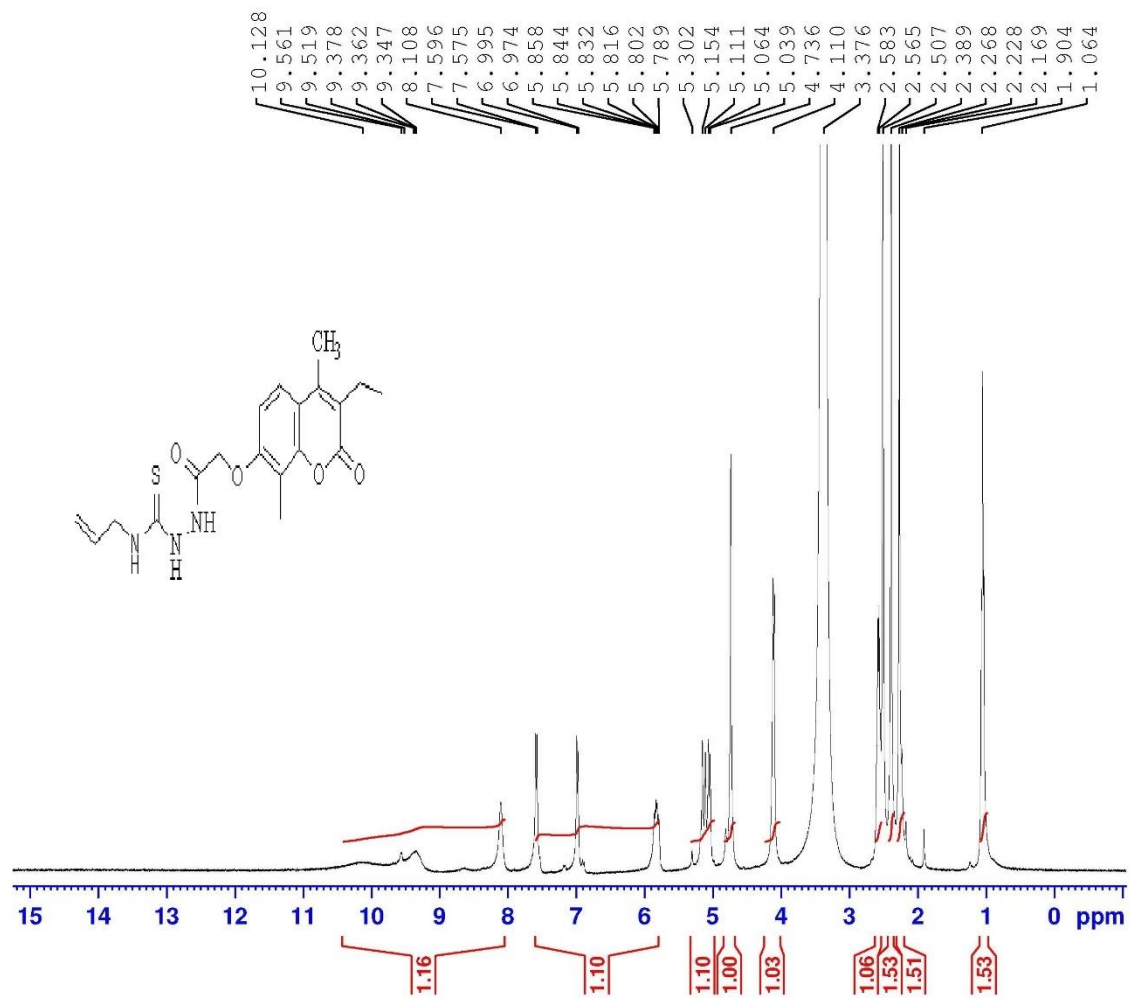

**Figure S22:** <sup>1</sup>H NMR spectrum of the compound **6b**.



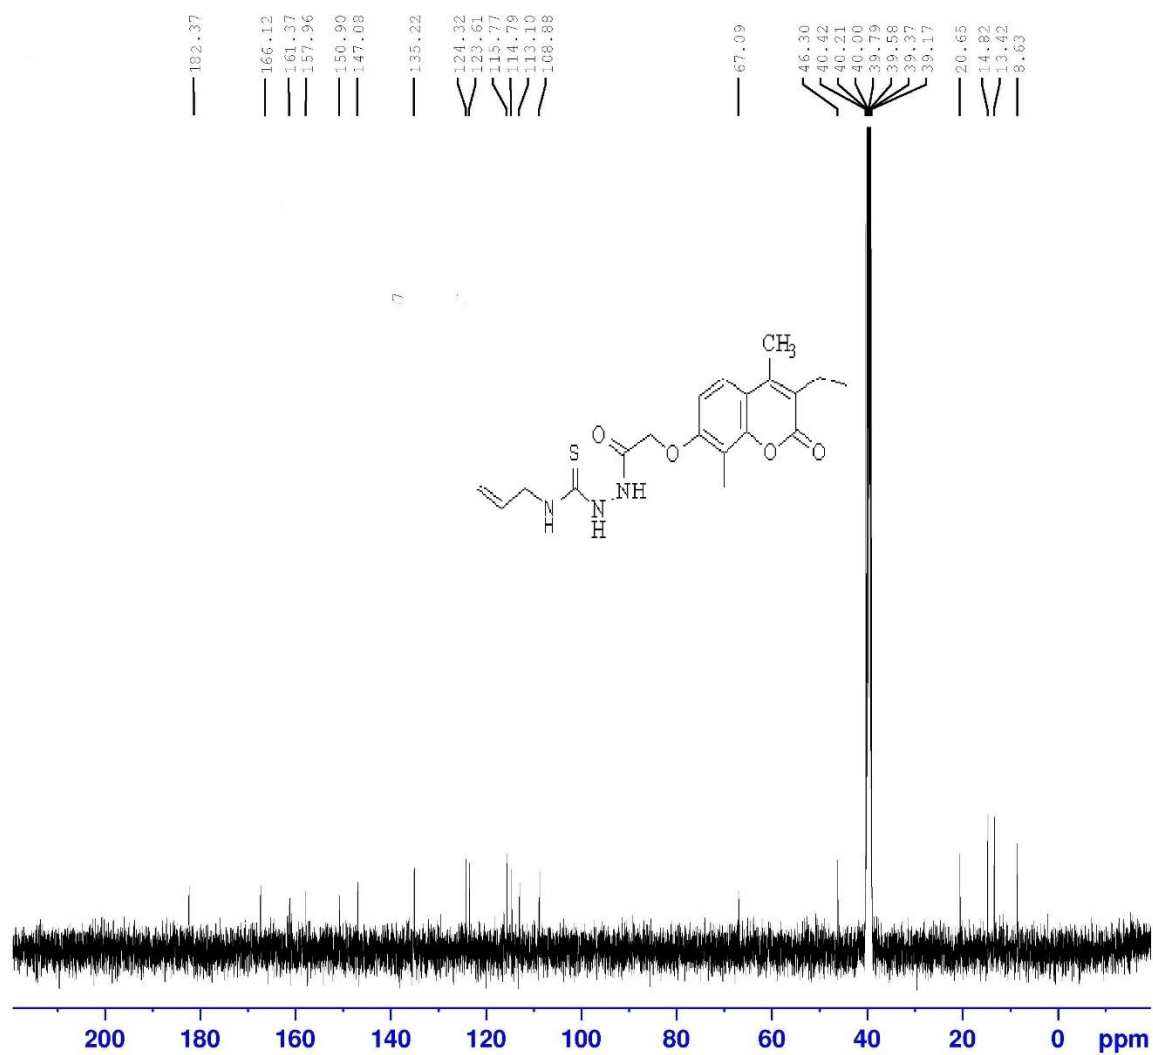

**Figure S23:** <sup>13</sup>C NMR spectrum of the compound **6b**.

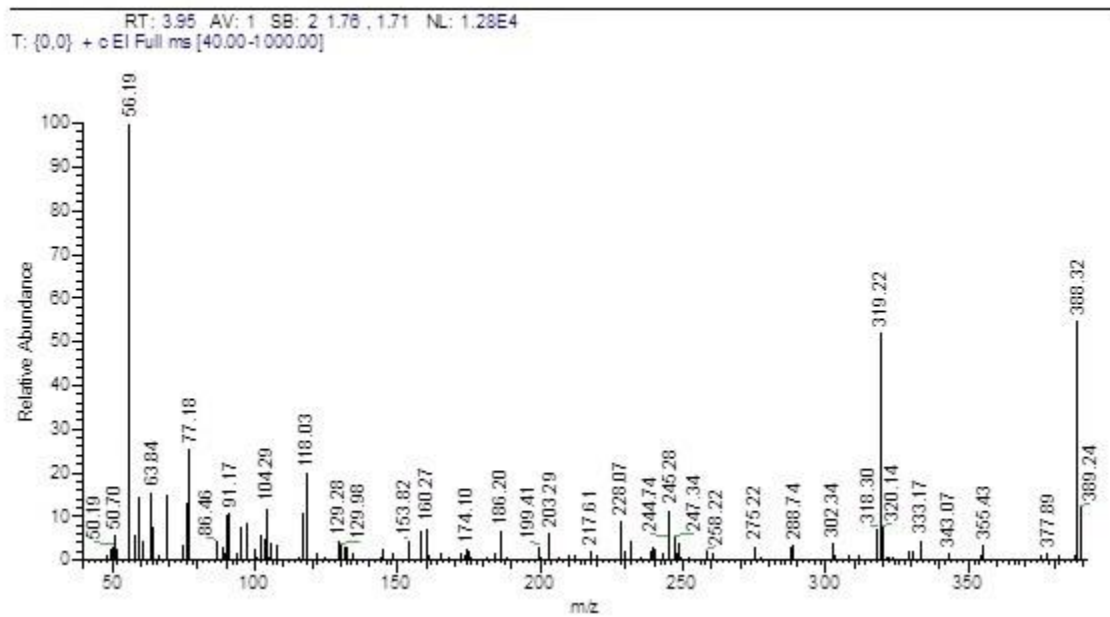

**Figure S24:** MS of the compound **6b**.

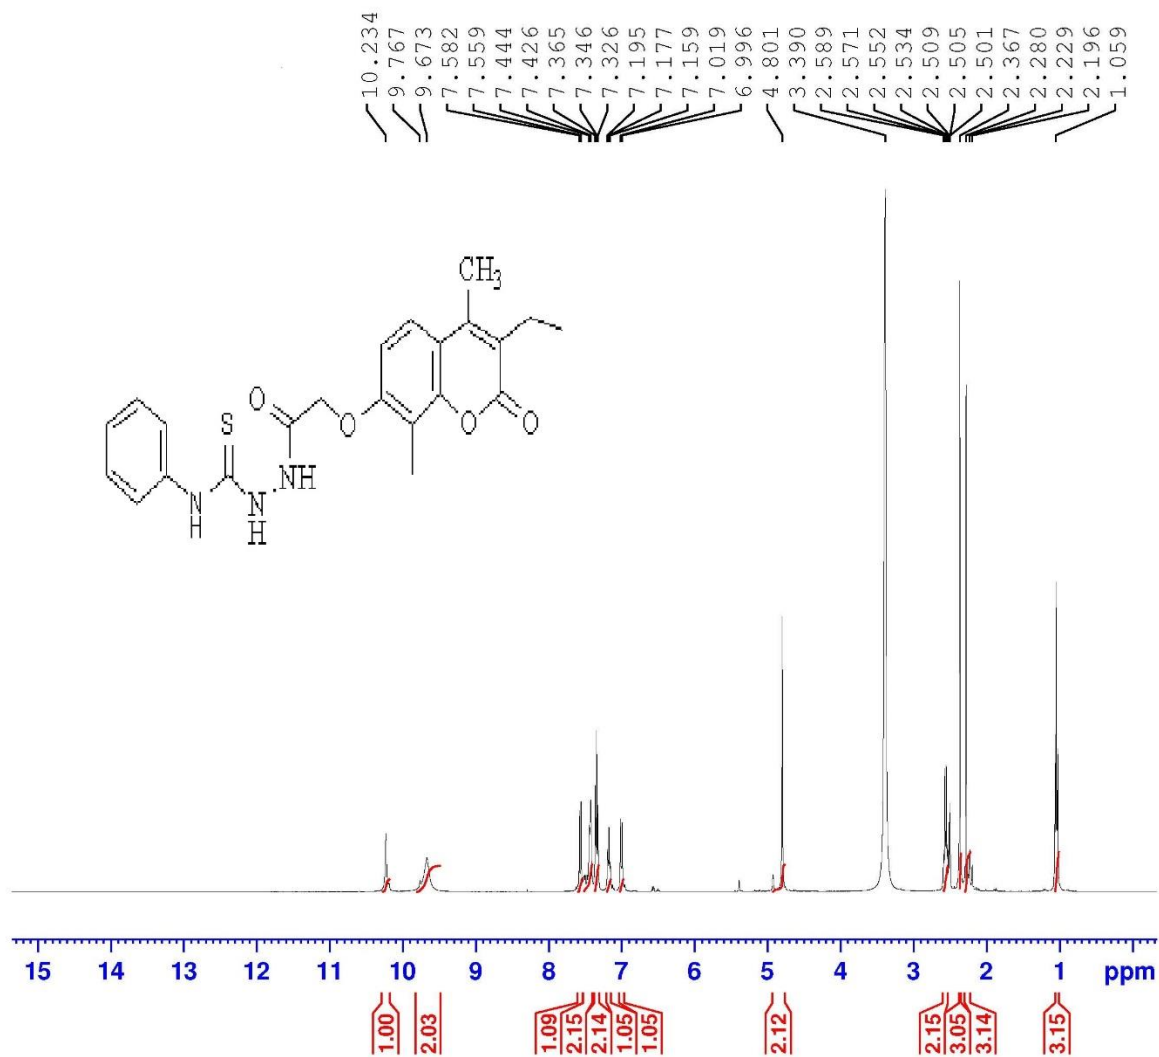

**Figure S25:** <sup>1</sup>H NMR spectrum of the compound **6c**.

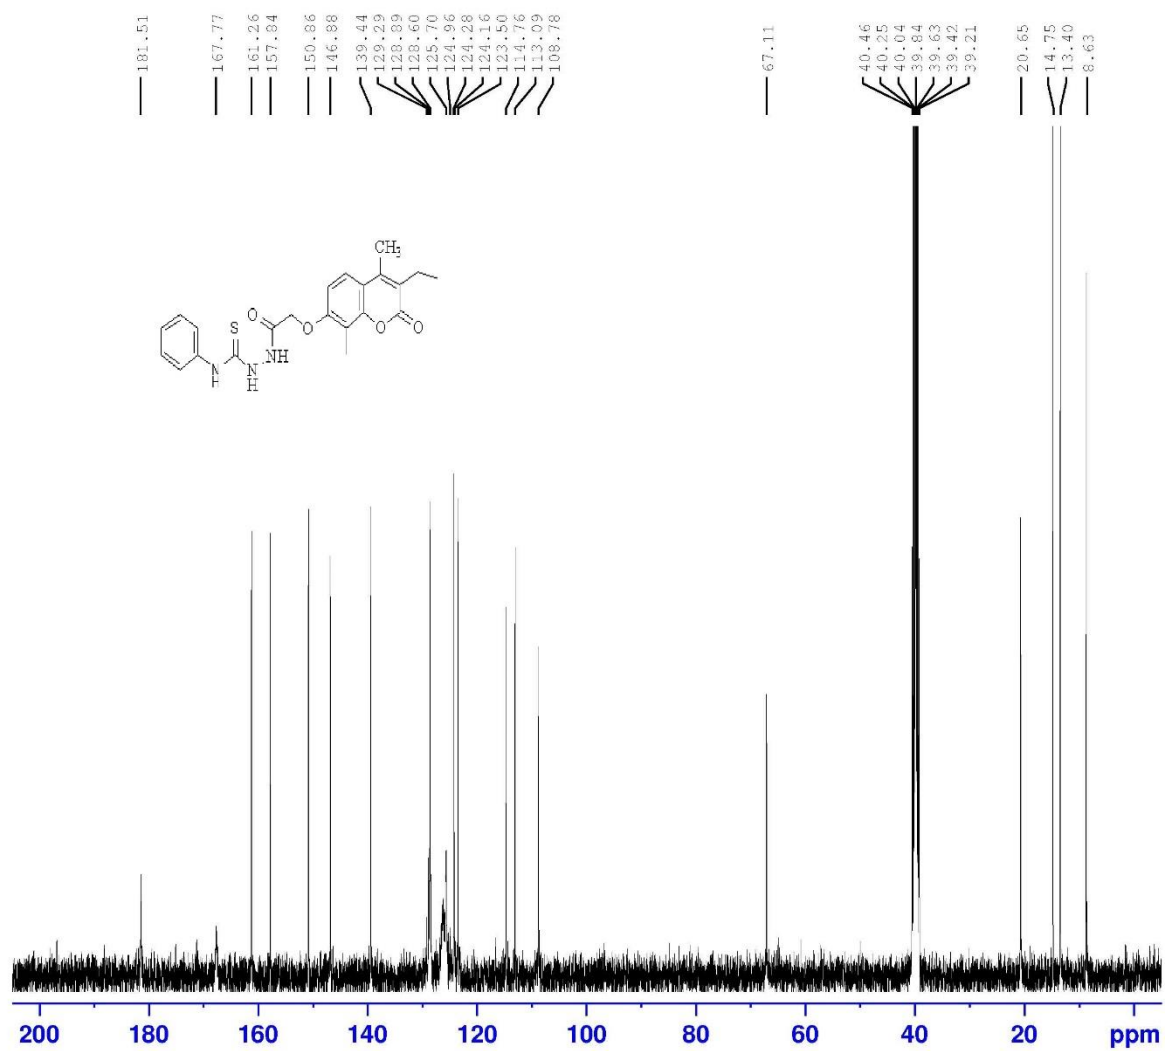

Figure S26: <sup>13</sup>C NMR spectrum of the compound 6c.

RT: 2.96 AV: 1 SB: 2 3.82, 3.53 NL: 1.40E3  
T: {0,0} + eEI Full ms [40.00-1000.00]

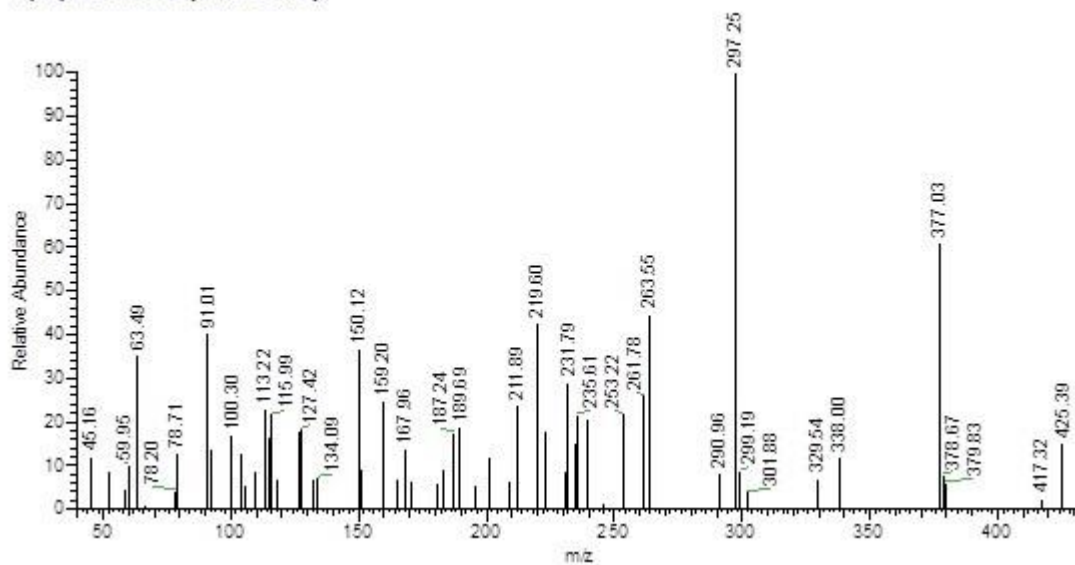

Figure S27: MS of the compound 6c.

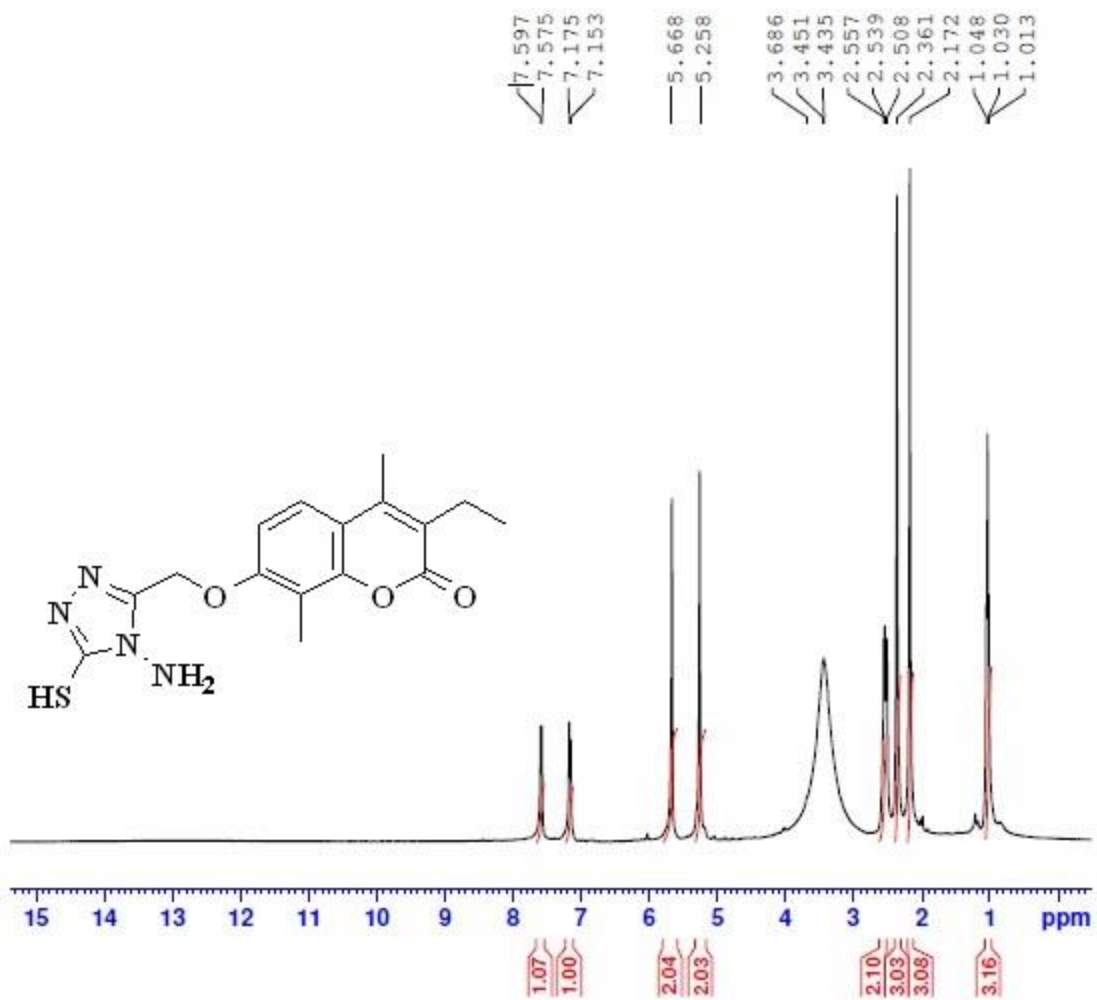

**Figure S28:** <sup>1</sup>H NMR spectrum of the compound 7.

ina-6 #224 RT: 3.77 AV: 1 SB: 2 3.82, 3.53 NL: 4.51E2  
T: {0,0} + c EI Full ms [40.00-1000.00]

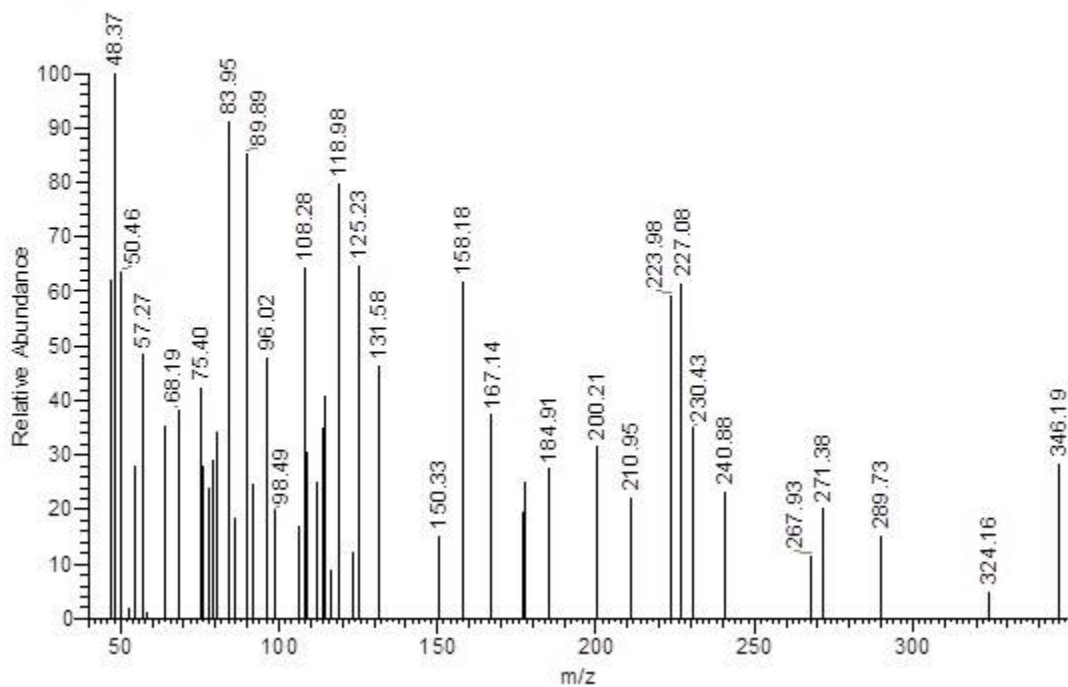

**Figure S29:** MS of the compound 7.

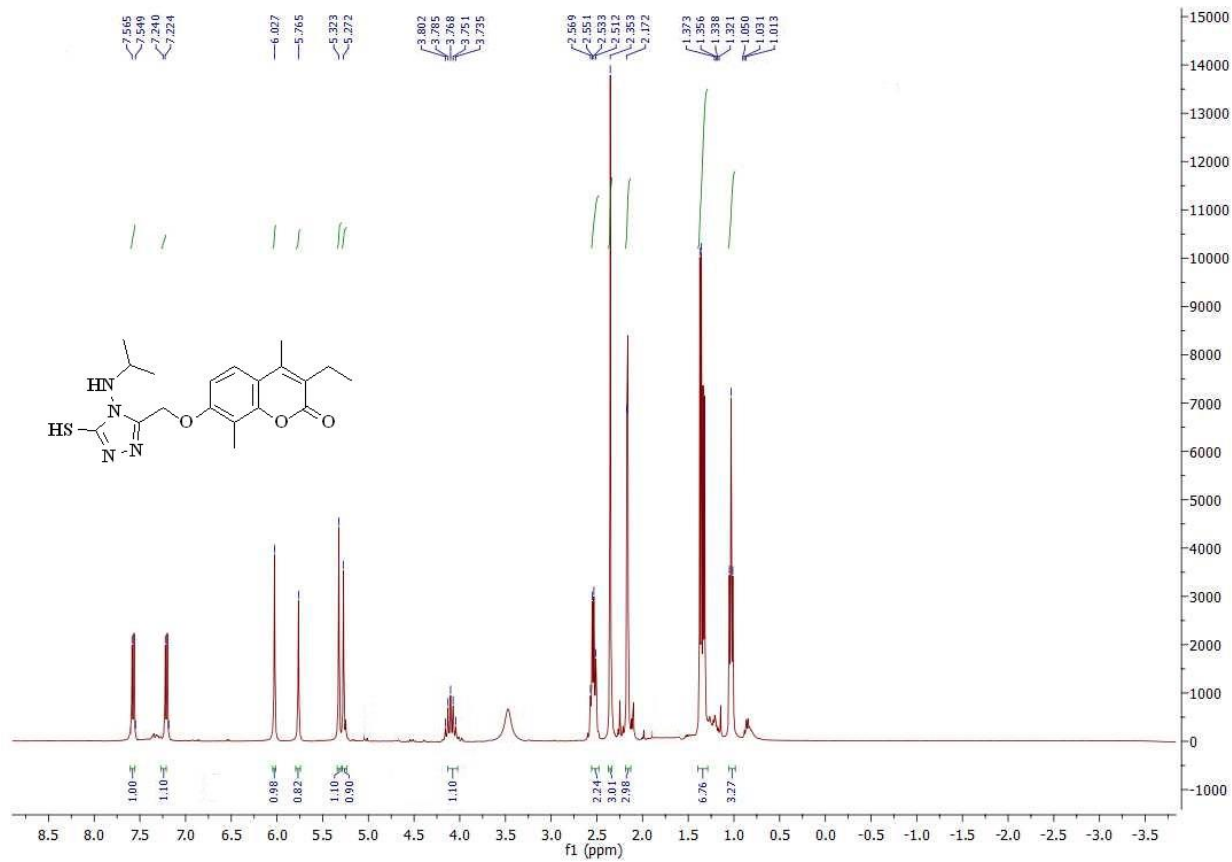

**Figure S30:**  $^1\text{H}$  NMR spectrum of the compound **8**.



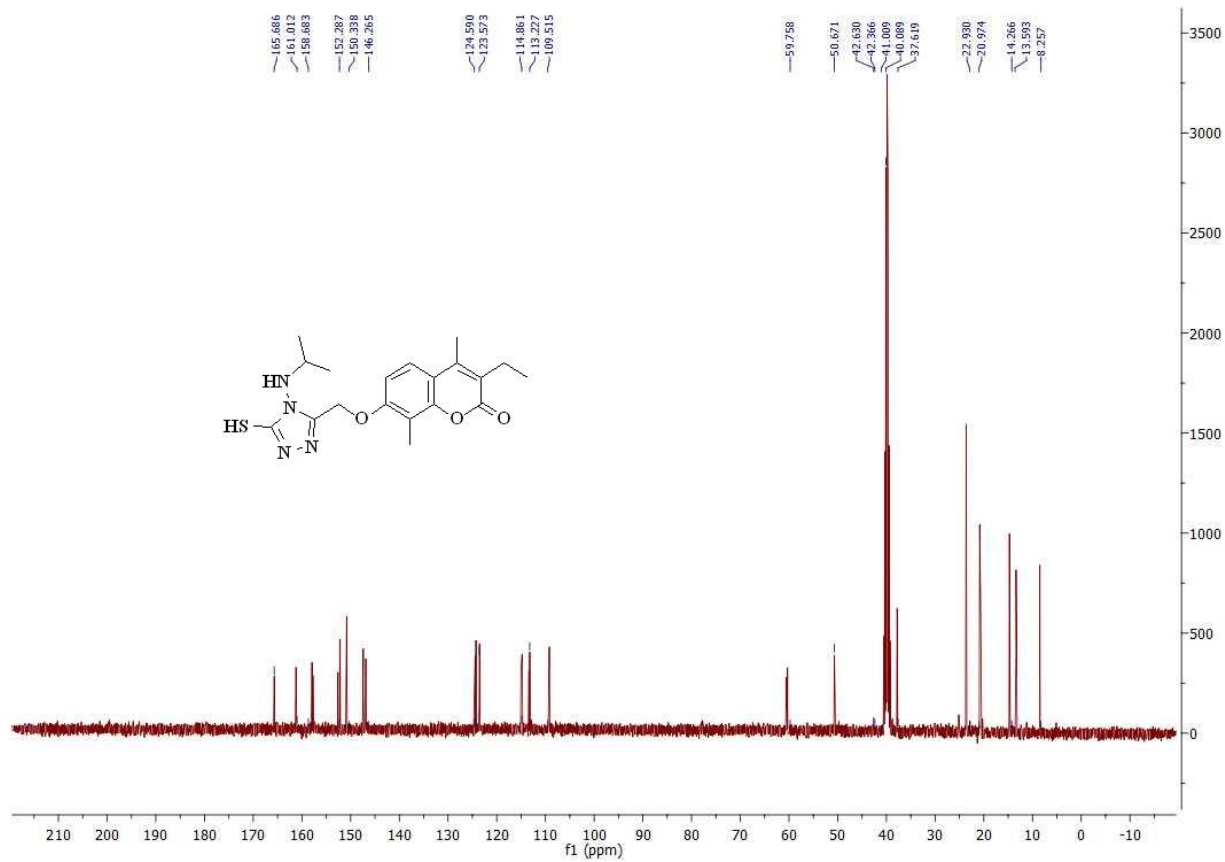

Figure S31:  $^{13}\text{C}$  NMR spectrum of the compound 8.

lina-7#275 RT: 4.62 AV: 1 SB: 2 3.82, 3.53 NL: 3.03E3  
T: [0,0] + e EI Full ms [40.00-1000.00]

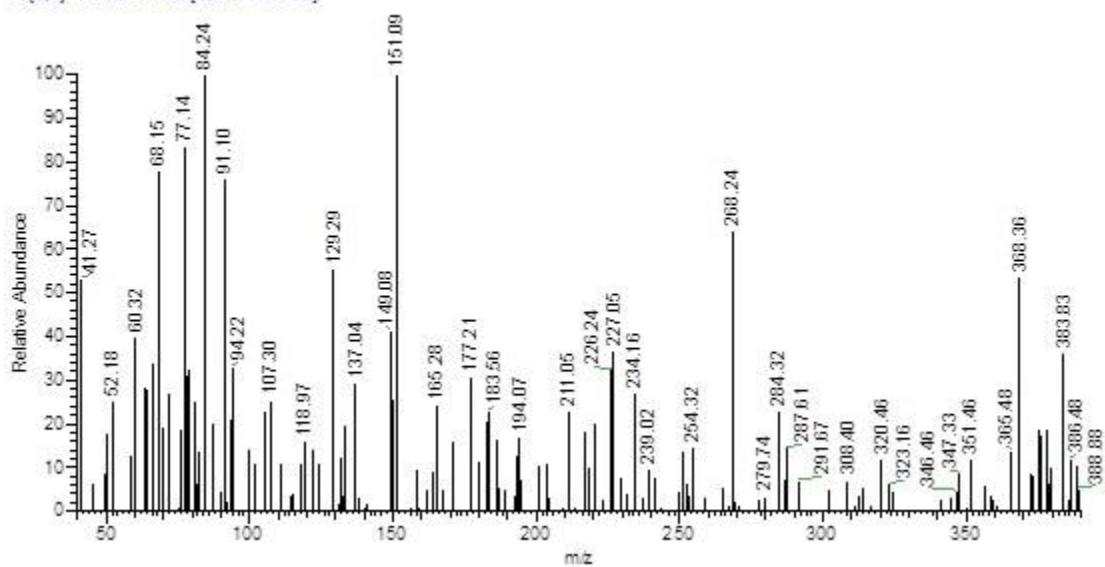

**Figure S32:** MS of the compound 8.

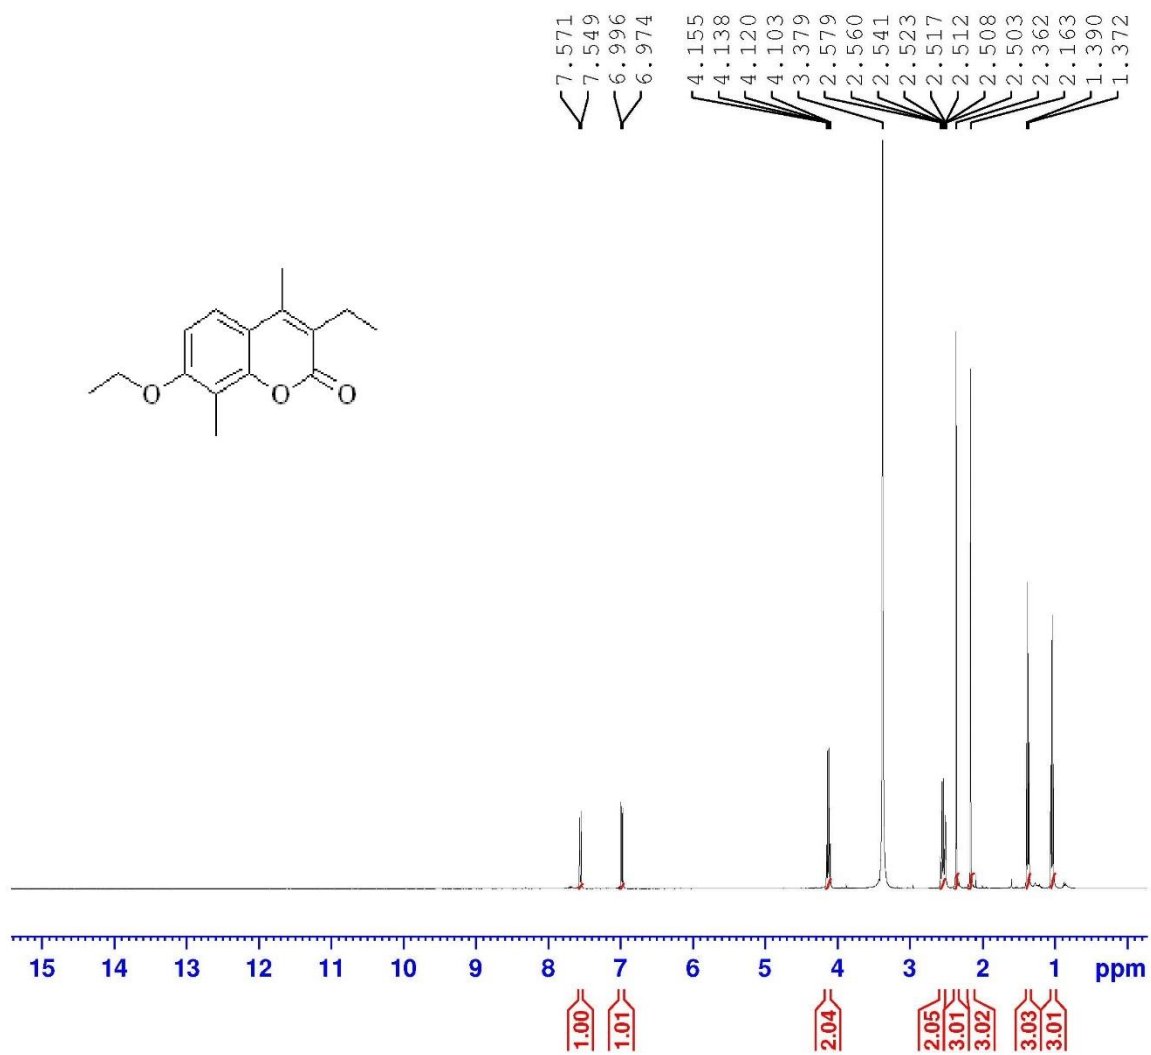

**Figure S33:** <sup>1</sup>H NMR spectrum of the compound **9a**.

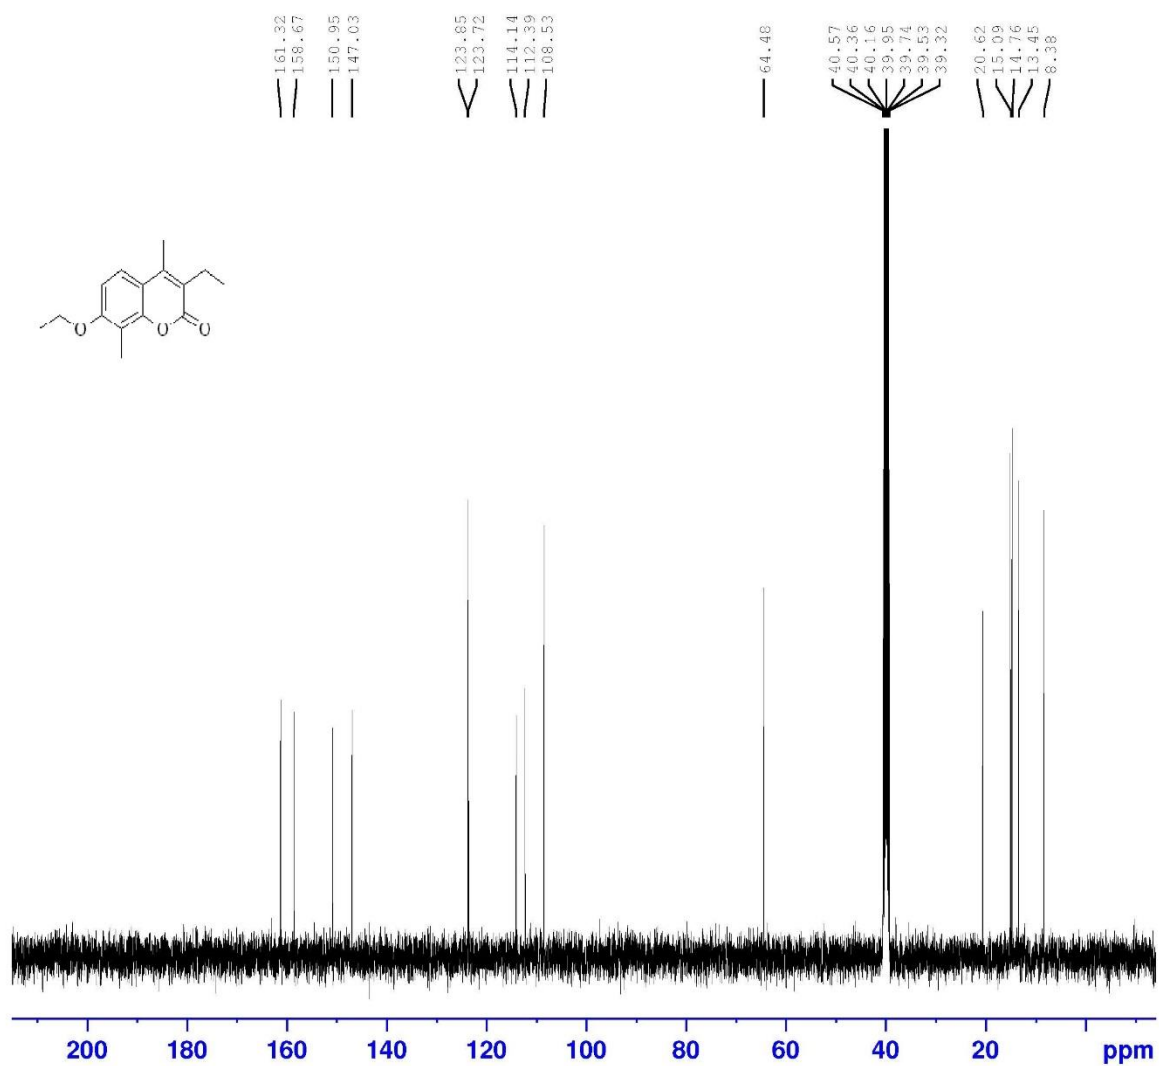

Figure S34: <sup>13</sup>C NMR spectrum of the compound 9a.

RT: 1.05 AV: 1 SB: 17 0.50-0.60 , 0.54-0.69 NL: 7.26E2  
T: {0,0} + cEI Full ms [40.00-1000.00]

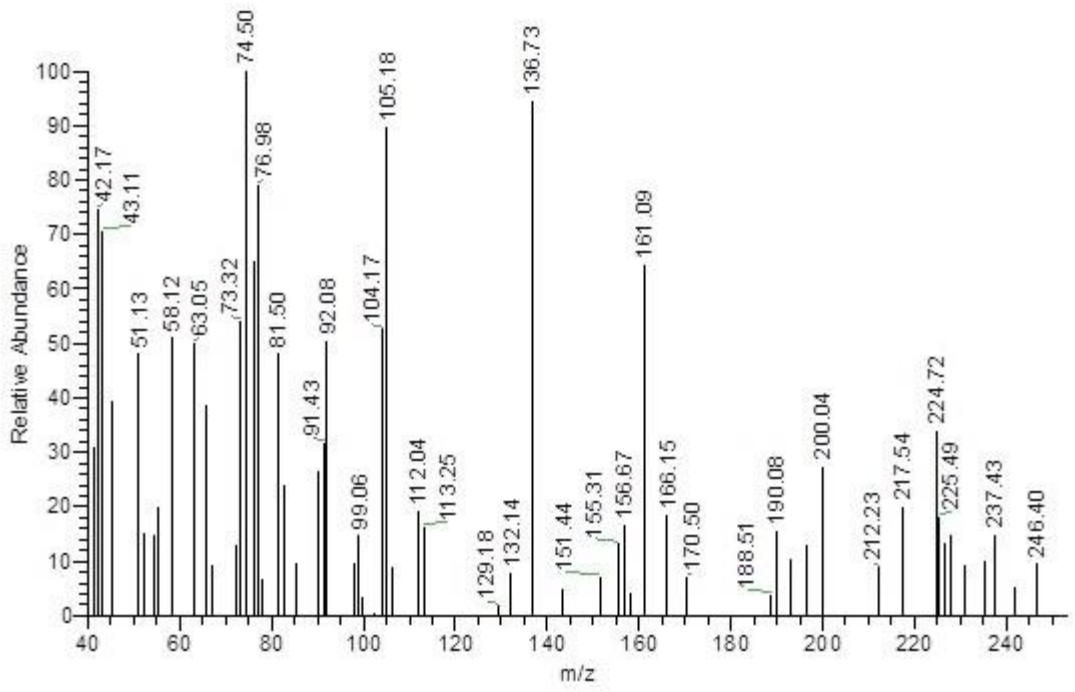

Figure S35: MS of the compound 9a.

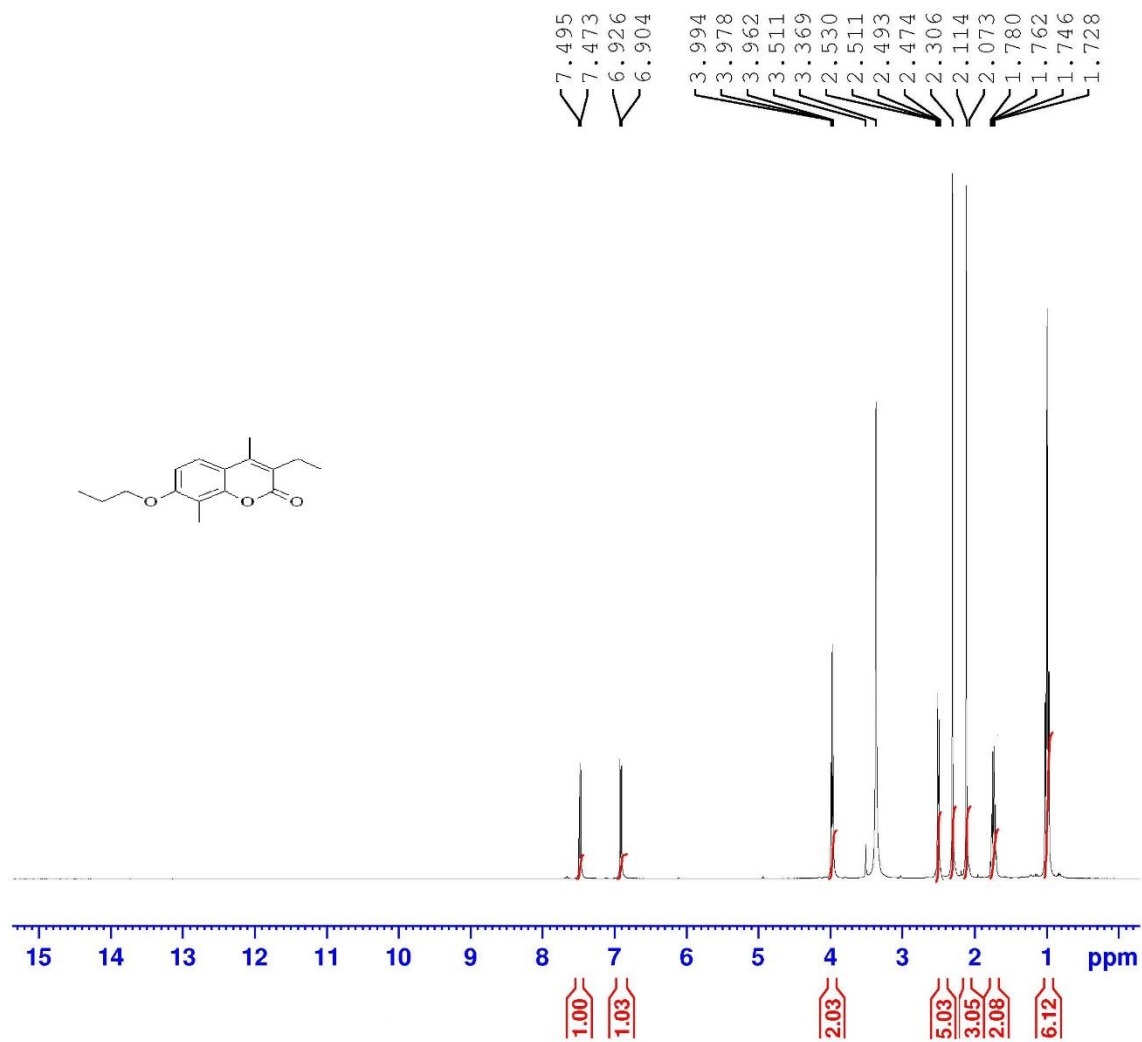

**Figure S36:** <sup>1</sup>H NMR spectrum of the compound **9b**.

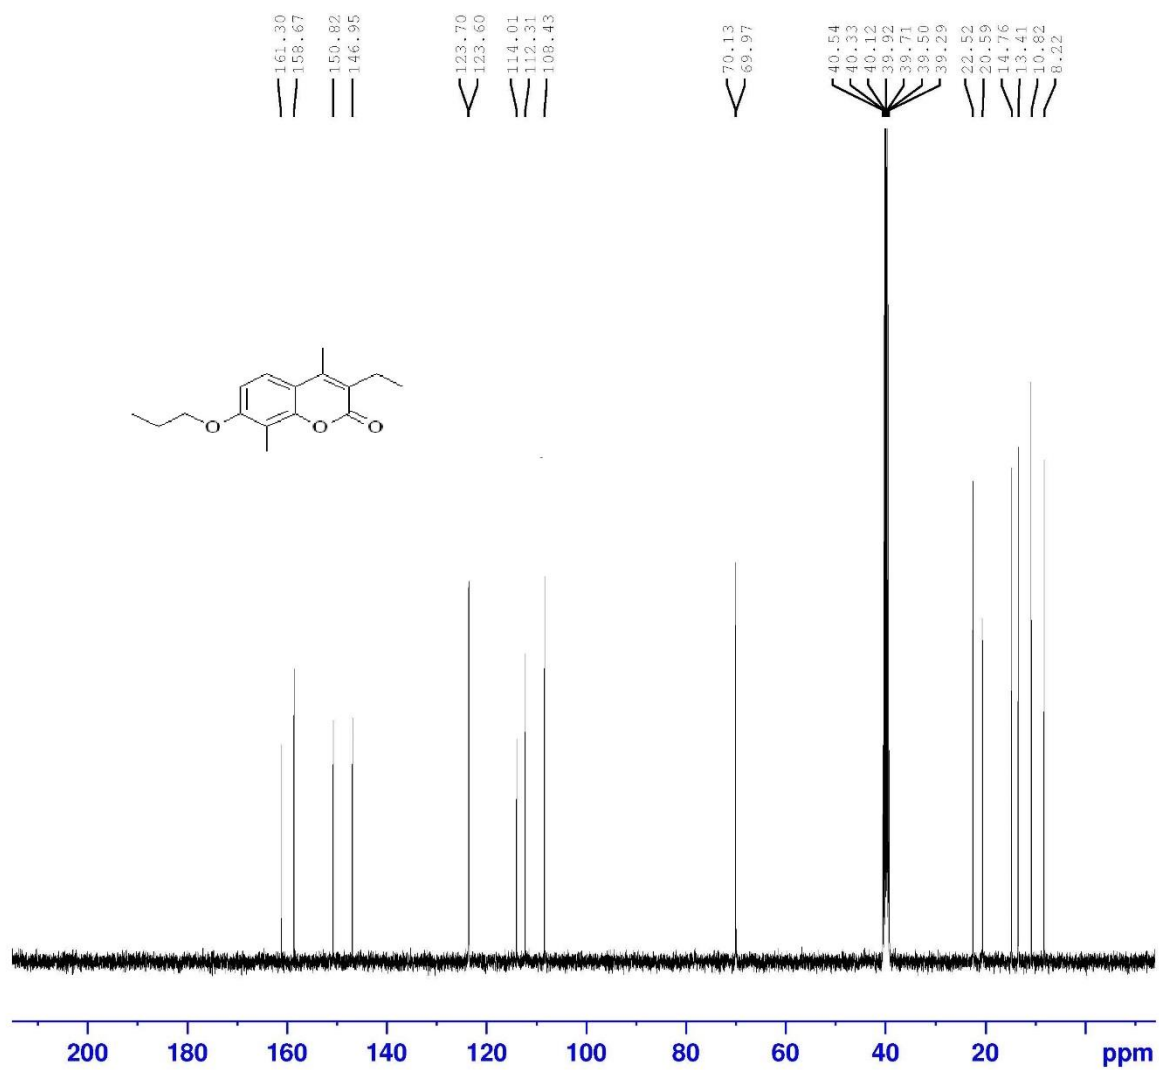

Figure S37:  $^{13}\text{C}$  NMR spectrum of the compound **9b**.

RT: 1.14 AV: 1 SB: 9 0.59, 0.42-0.54 NL: 1.97E3  
T: {0,0} + c EI Full ms [40.00-1000.00]

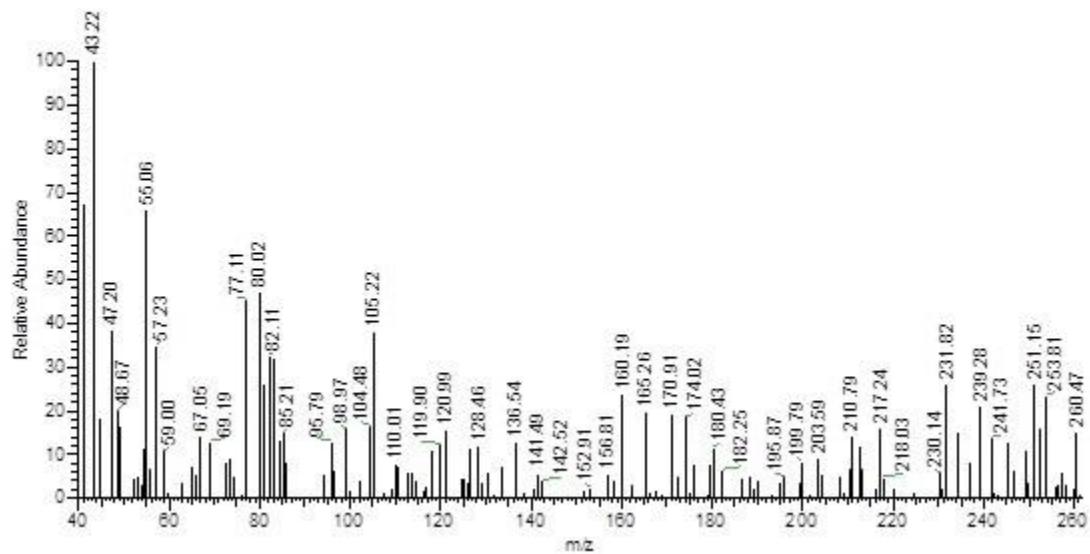

Figure S38: MS of the compound 9b.



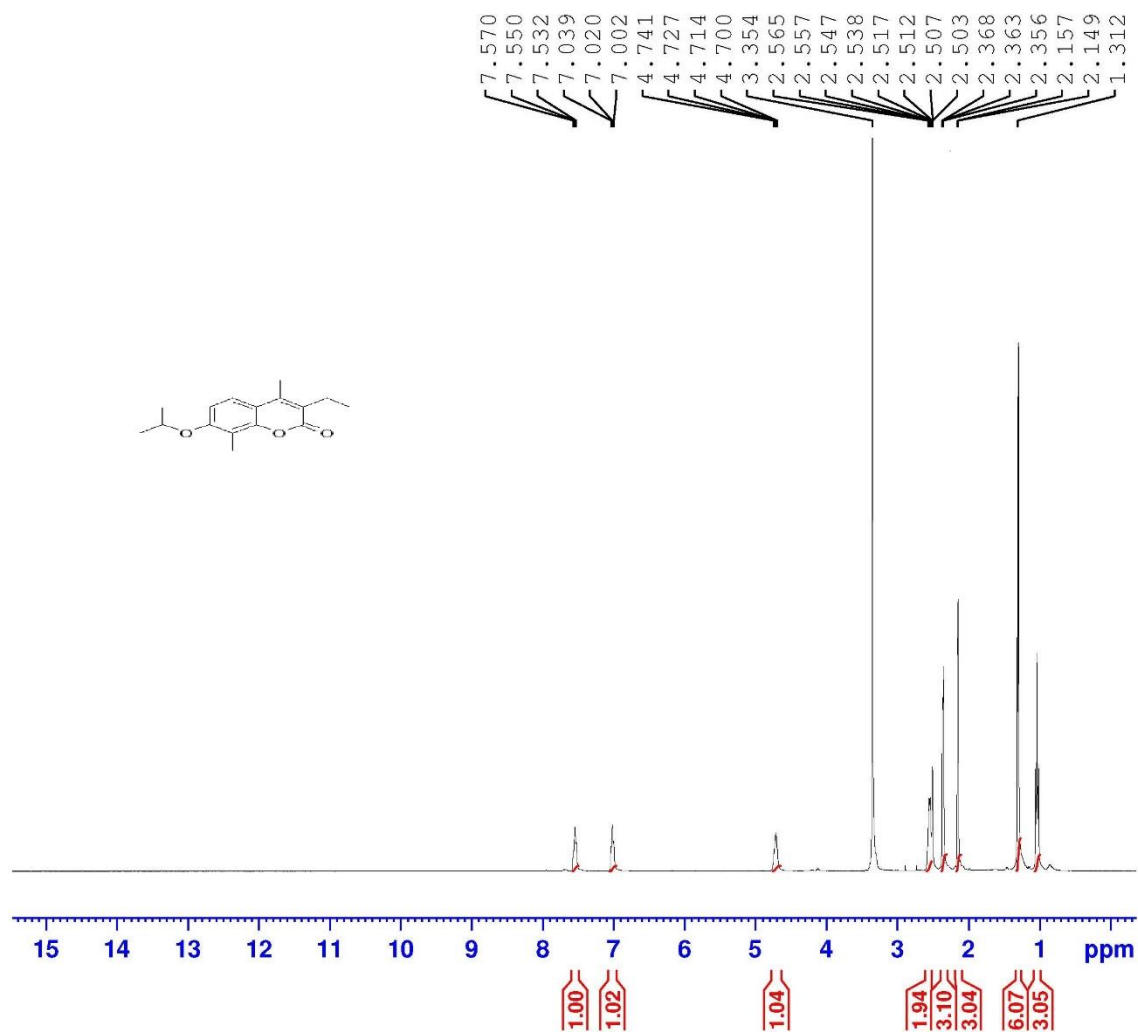

**Figure S39:** <sup>1</sup>H NMR spectrum of the compound **9c**.

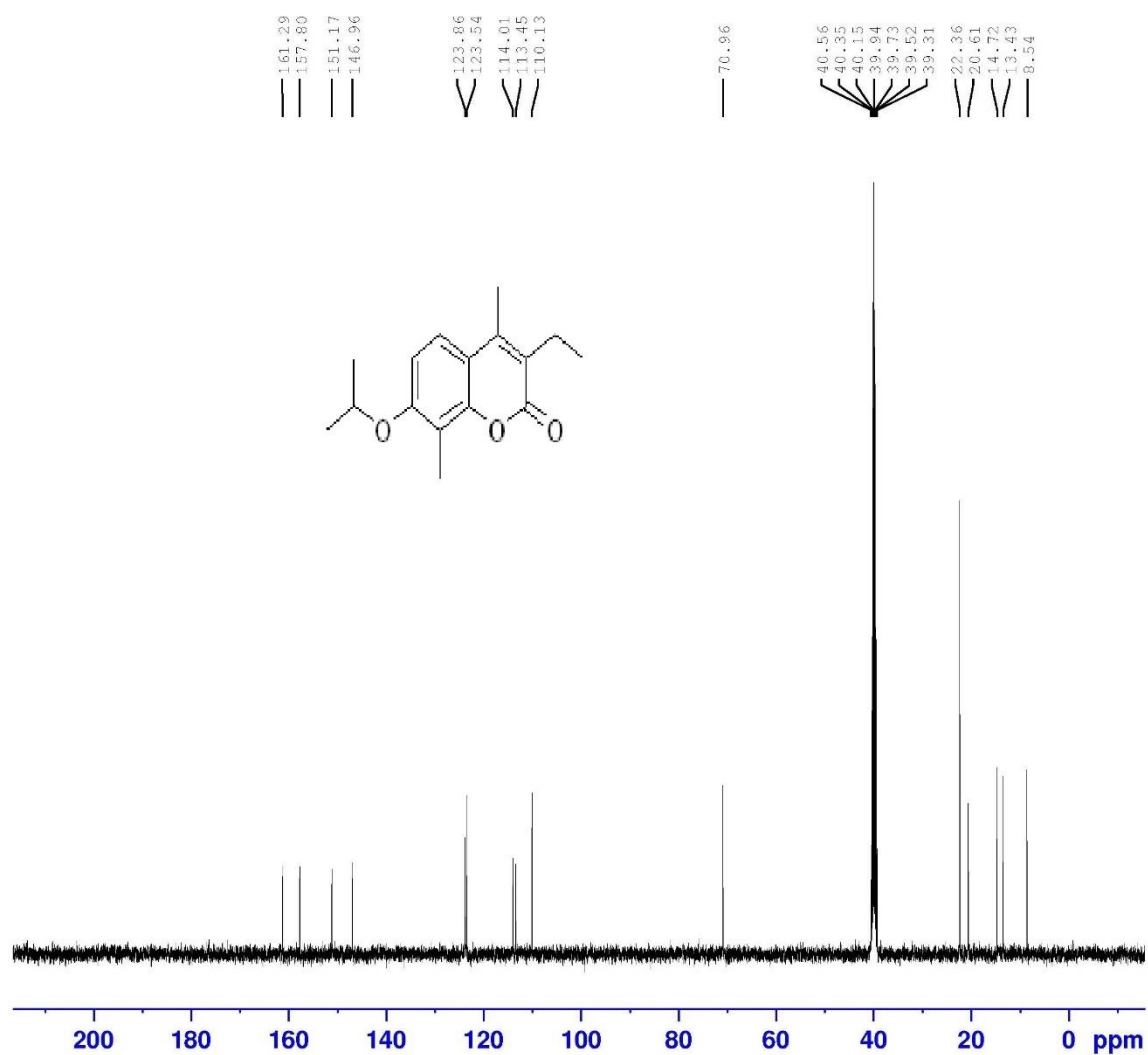

**Figure S40:**  $^{13}\text{C}$  NMR spectrum of the compound **9c**.

RT: 3.85 AV: 1 SB: 2 3.82, 3.53 NL: 7.56E2  
T: {0,0} + eEI Full ms [40.00-1000.00]

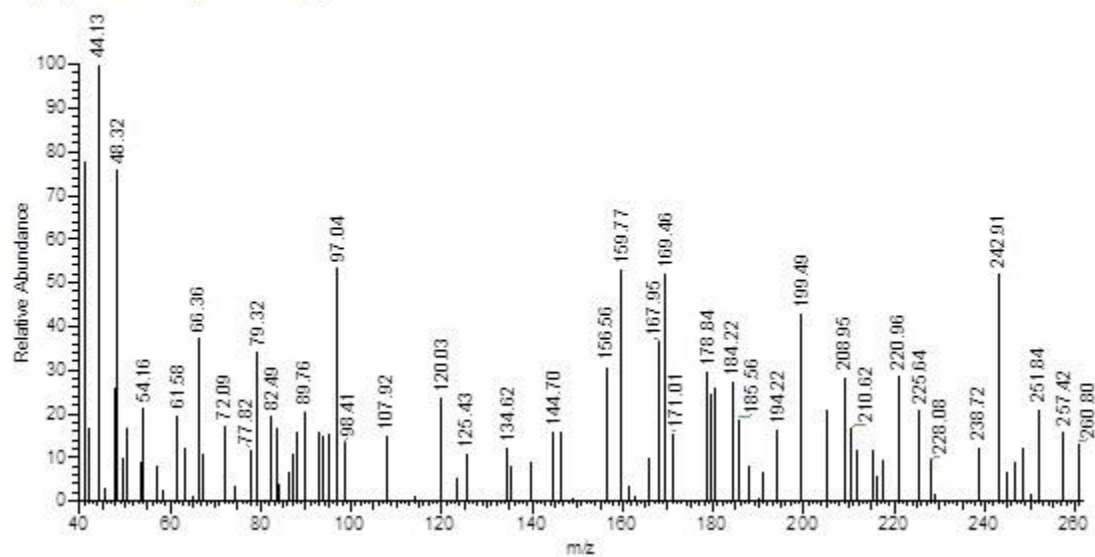

Figure S41: MS of the compound 9c.

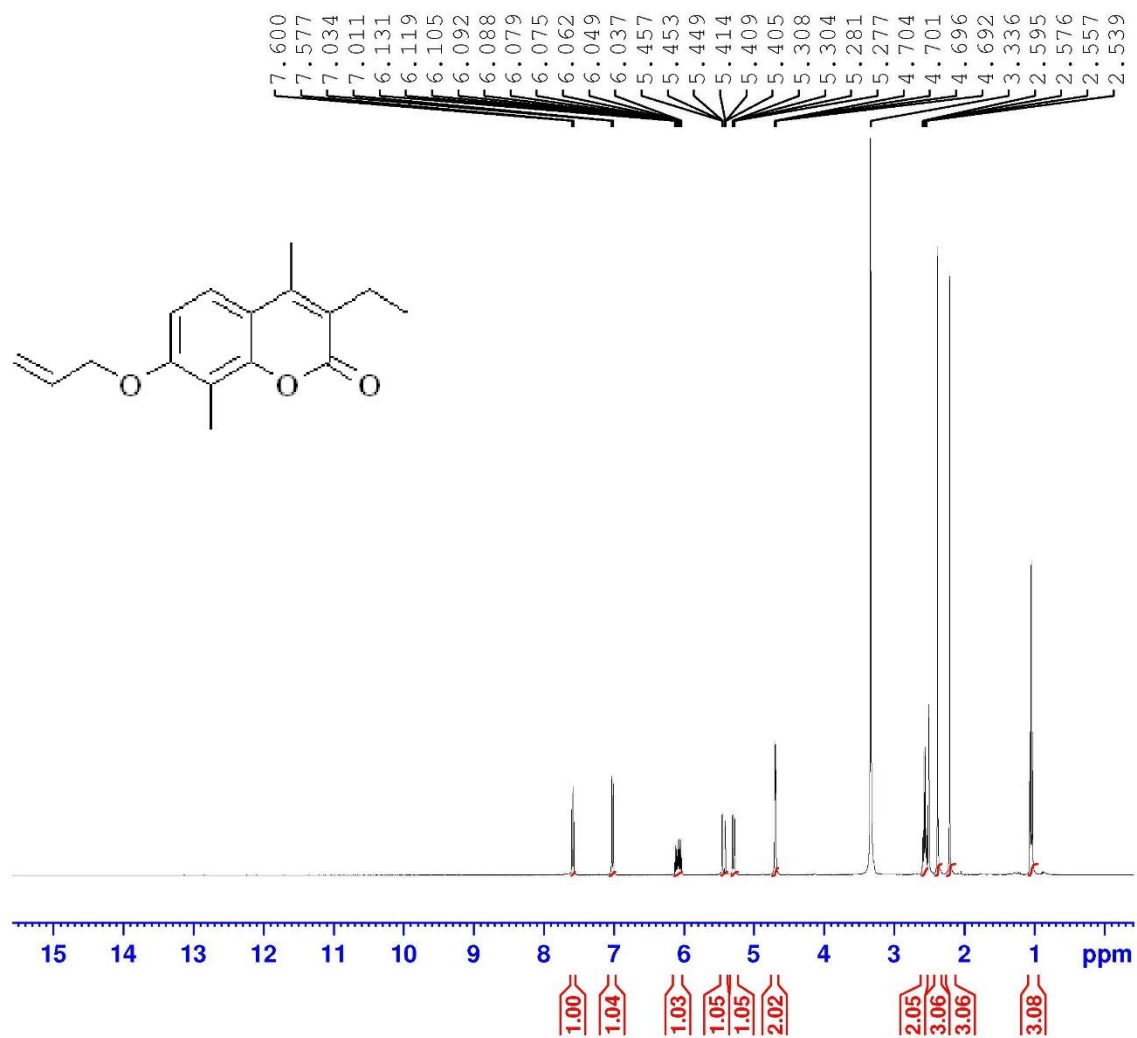

**Figure S42:** <sup>1</sup>H NMR spectrum of the compound **9d**.

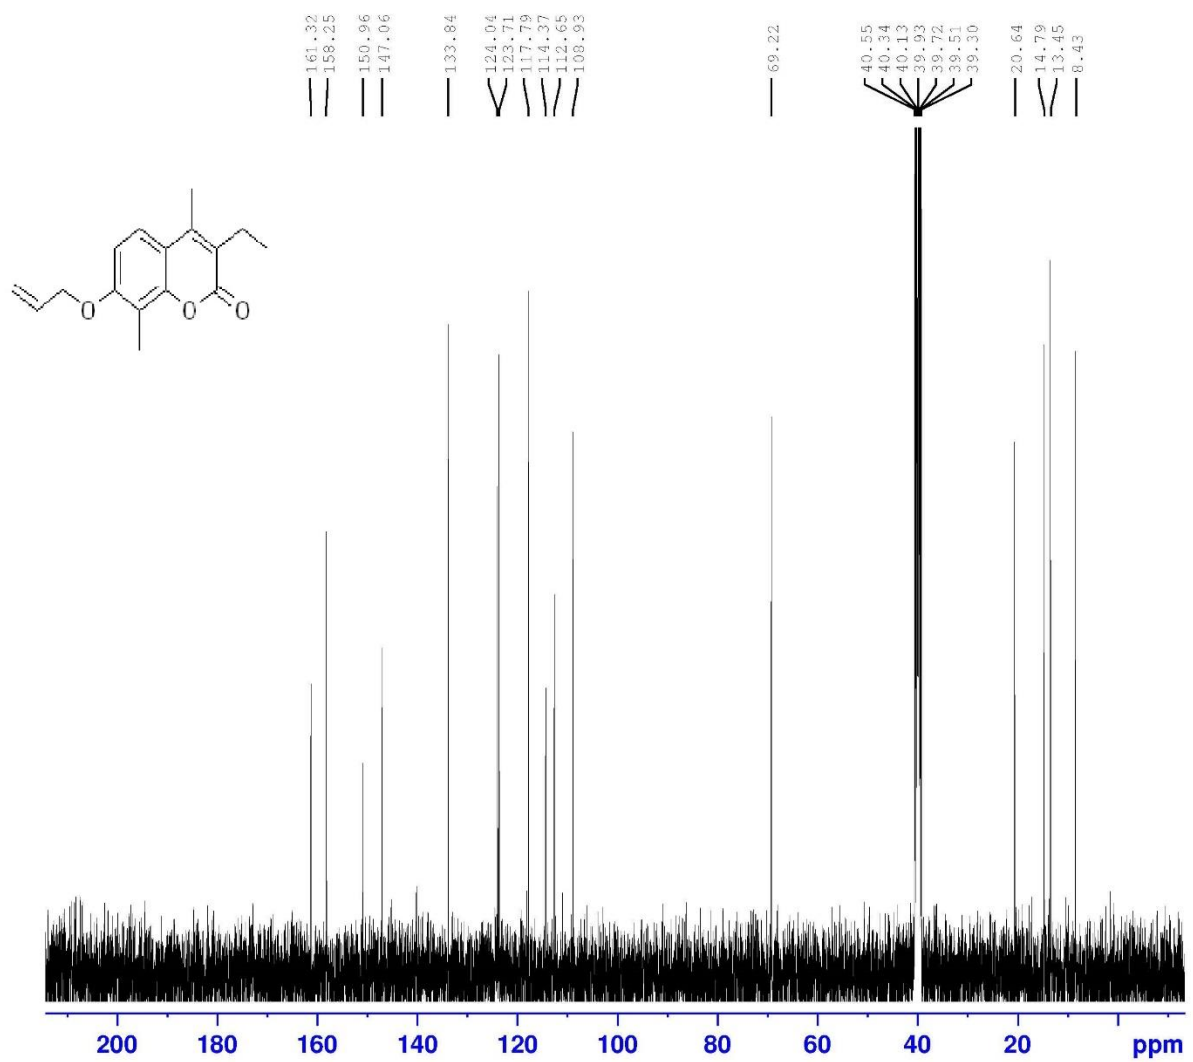

**Figure S43:** <sup>13</sup>C NMR spectrum of the compound **9d**.

RT: 0.79-0.90 AV: 8 SB: 2 3.82 , 3.53 NL: 7.17E1  
T: {0,0} + c EI Full ms [40.00-1000.00]

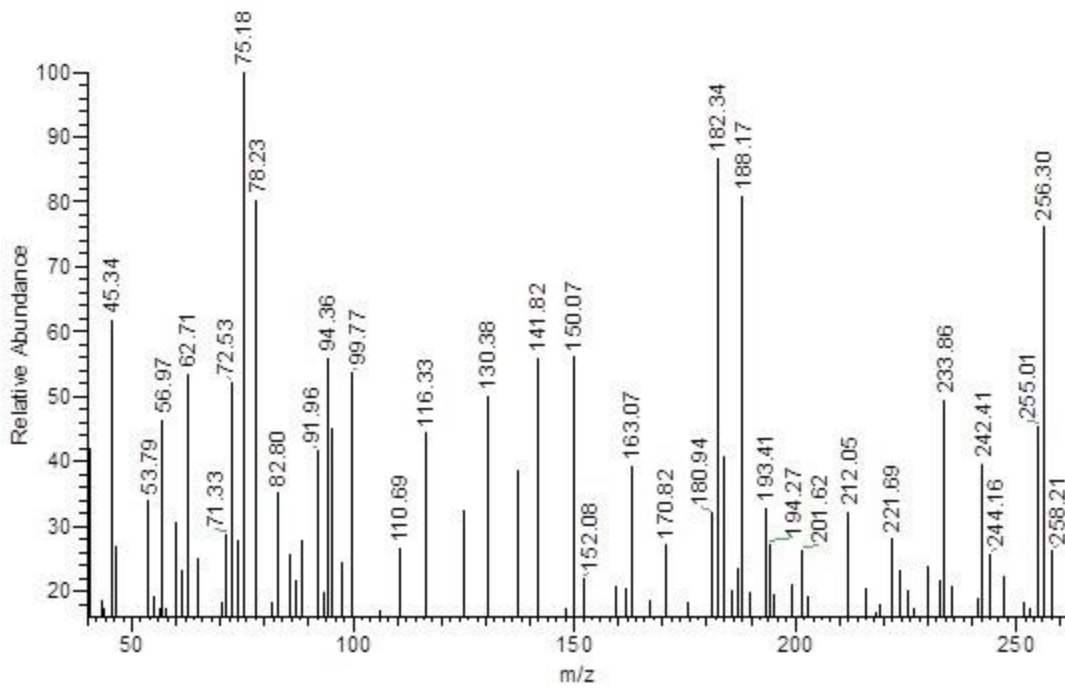

Figure S44: MS of the compound 9d.

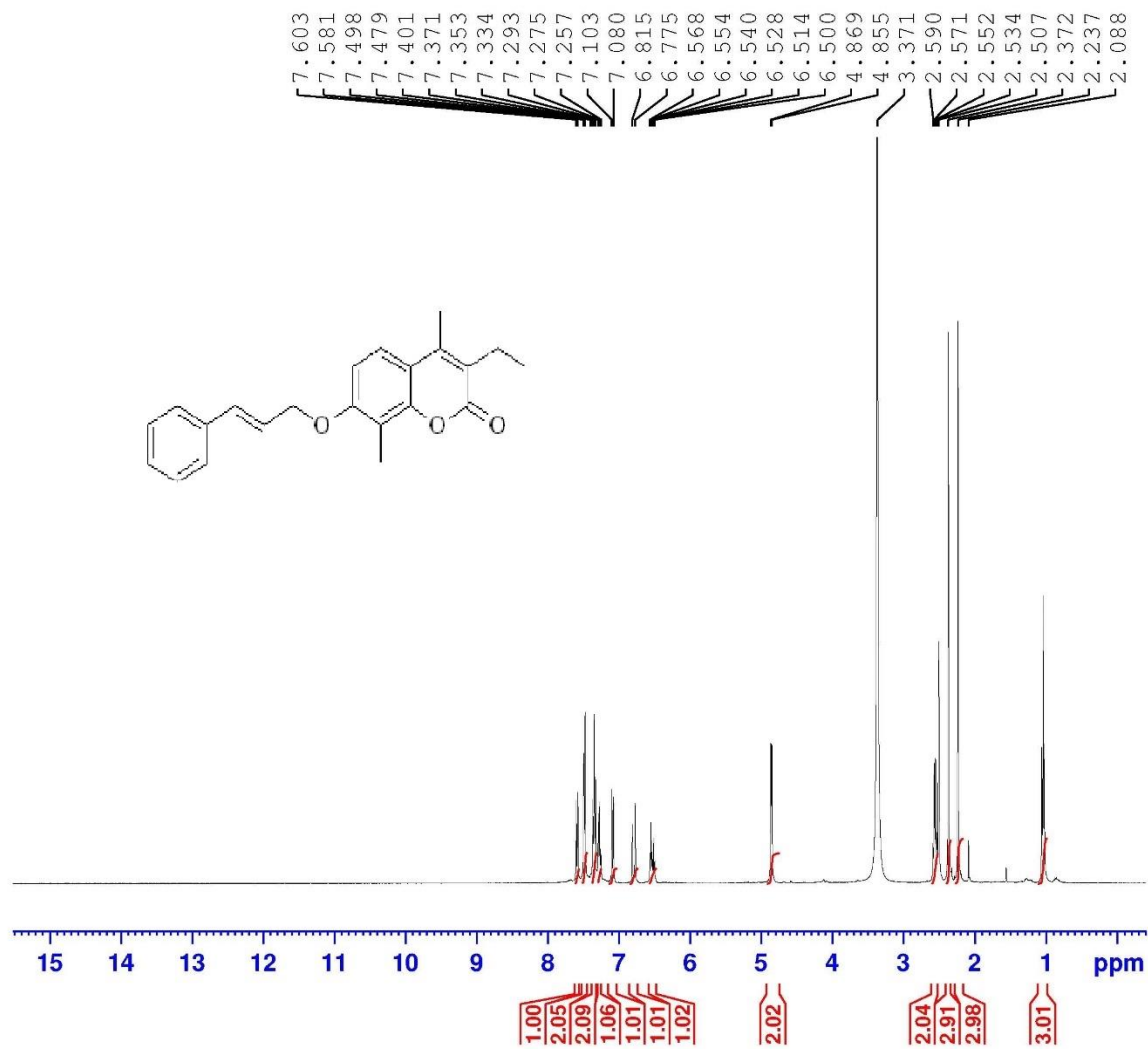

**Figure S45:** <sup>1</sup>H NMR spectrum of the compound **9e**.

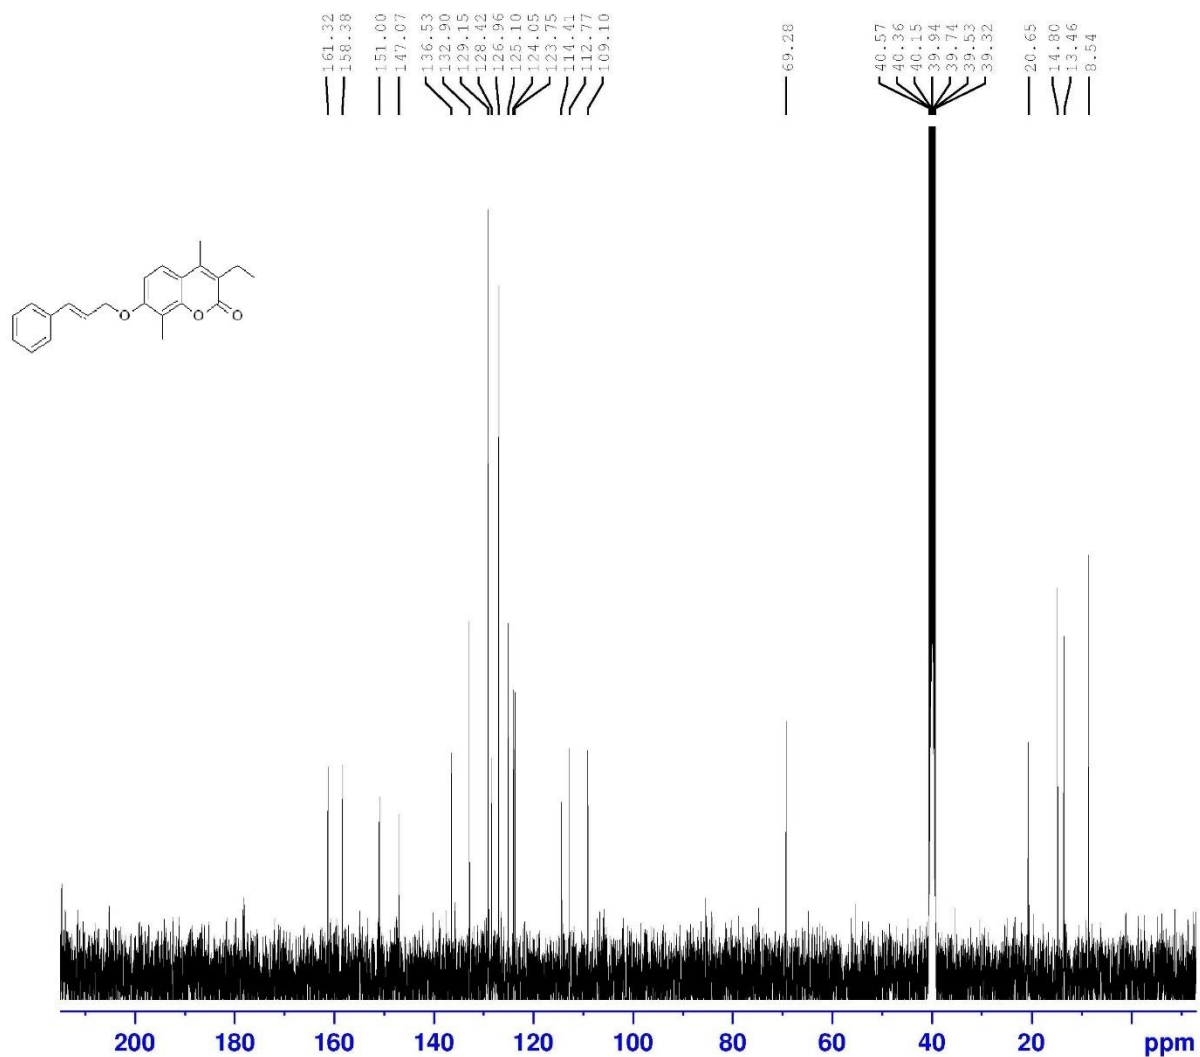

**Figure S46:** <sup>13</sup>C NMR spectrum of the compound **9e**.



RT: 3.55 AV: 1 SB: 2 3.82, 3.53 NL: 1.82E3  
T: (0,0) + eEI Full ms [40.00-1000.00]

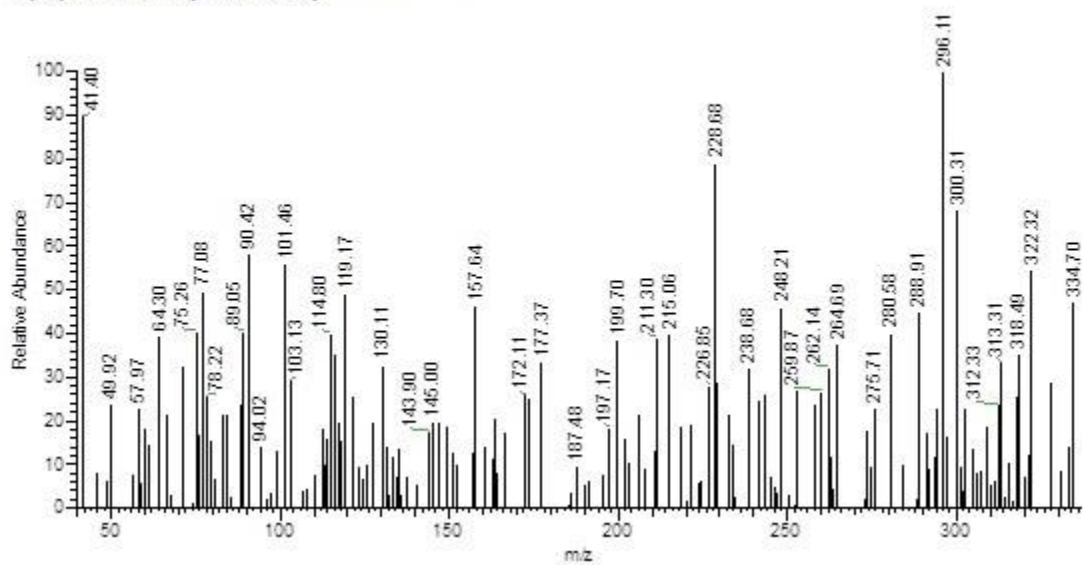

Figure S47: MS of the compound 9e.

## Part 2: Biological studies:

**Table S. 1:** The viability percentage for 6 concentrations ( $\mu\text{M}$ ) for each compound and their  $\text{IC}_{50}$  on PC-3 cell line.

| ID         | Mwt        | ug/ml      | O.D       |           |         | Viability % |           |         | Mean Viability % | IC50 ug/ml |          |     | MeanIC50 ug/ml | SD        | IC50 UM |      |          | MeanIC50 ug/ml | SD        |
|------------|------------|------------|-----------|-----------|---------|-------------|-----------|---------|------------------|------------|----------|-----|----------------|-----------|---------|------|----------|----------------|-----------|
|            |            |            |           |           |         |             |           |         |                  |            |          |     |                |           |         |      |          |                |           |
| <b>Pc3</b> |            | -----<br>- | 0.72<br>2 | 0.71<br>9 | 0.<br>7 | 100         | 100       | 10<br>0 | 100              |            |          |     |                |           |         |      |          |                |           |
| <b>4a</b>  | <b>409</b> | 1000       | 0.02<br>5 | 0.01<br>8 | 0       | 3.4<br>6    | 2.50<br>3 | 3.1     | 3.03             | 4          | 4.0<br>5 | 4.5 | 4.183          | 0.23<br>7 | 9.9     | 9.9  | 10.<br>9 | 10.218         | 0.57<br>9 |
|            |            | 500        | 0.03<br>8 | 0.03<br>7 | 0       | 5.2<br>6    | 5.14<br>6 | 5.5     | 5.32             |            |          |     |                |           |         |      |          |                |           |
|            |            | 250        | 0.05<br>9 | 0.05<br>8 | 0.<br>1 | 8.1<br>7    | 8.06<br>7 | 8       | 8.06             |            |          |     |                |           |         |      |          |                |           |
|            |            | 125        | 0.07<br>4 | 0.07<br>9 | 0.<br>1 | 10.<br>2    | 10.9<br>9 | 10      | 10.4             |            |          |     |                |           |         |      |          |                |           |
|            |            | 62.5       | 0.12<br>7 | 0.12<br>9 | 0.<br>1 | 17.<br>6    | 17.9<br>4 | 18      | 18               |            |          |     |                |           |         |      |          |                |           |
|            |            | 31.25      | 0.16<br>1 | 0.15<br>7 | 0.<br>2 | 22.<br>3    | 21.8<br>4 | 23      | 22.2             |            |          |     |                |           |         |      |          |                |           |
| <b>4b</b>  | <b>430</b> | 1000       | 0.05<br>5 | 0.04<br>8 | 0.<br>1 | 7.6<br>2    | 6.67<br>6 | 7.4     | 7.23             | 3.5        | 3.6<br>8 | 4.4 | 3.871          | 0.49<br>3 | 8.13    | 8.55 | 10.3     | 8.9927         | 1.14<br>6 |
|            |            | 500        | 0.05<br>8 | 0.05<br>8 | 0.<br>1 | 8.0<br>3    | 8.06<br>7 | 8.5     | 8.21             |            |          |     |                |           |         |      |          |                |           |
|            |            | 250        | 0.08<br>4 | 0.07<br>9 | 0.<br>1 | 11.<br>6    | 10.9<br>9 | 11      | 11.1             |            |          |     |                |           |         |      |          |                |           |
|            |            | 125        | 0.12<br>2 | 0.12<br>5 | 0.<br>1 | 16.<br>9    | 17.3<br>9 | 17      | 17.1             |            |          |     |                |           |         |      |          |                |           |
|            |            | 62.5       | 0.14<br>8 | 0.14<br>3 | 0.<br>1 | 20.<br>5    | 19.8<br>9 | 20      | 20.1             |            |          |     |                |           |         |      |          |                |           |
|            |            | 31.25      | 0.19<br>2 | 0.19      | 0.<br>2 | 26.<br>6    | 26.4<br>3 | 28      | 27               |            |          |     |                |           |         |      |          |                |           |
| <b>4c</b>  | <b>441</b> | 1000       | 0.05<br>1 | 0.04<br>8 | 0.<br>1 | 7.0<br>6    | 6.67<br>6 | 8.1     | 7.28             | 16         | 16.<br>8 | 17  | 16.55          | 0.52<br>3 | 36.2    | 38.2 | 38.3     | 37.579         | 1.18<br>8 |
|            |            | 500        | 0.08      | 0.07      | 0.      | 11.         | 10.9      | 11      | 11               |            |          |     |                |           |         |      |          |                |           |

|           |            |       |           |           |         |          |           |     |      |          |          |     |       |           |      |      |      |        |           |
|-----------|------------|-------|-----------|-----------|---------|----------|-----------|-----|------|----------|----------|-----|-------|-----------|------|------|------|--------|-----------|
|           |            |       |           | 9         | 1       | 1        | 9         |     |      |          |          |     |       |           |      |      |      |        |           |
|           |            | 250   | 0.10<br>4 | 0.10<br>1 | 0.<br>1 | 14.<br>4 | 14.0<br>5 | 14  | 14.1 |          |          |     |       |           |      |      |      |        |           |
|           |            | 125   | 0.14<br>9 | 0.15<br>5 | 0.<br>2 | 20.<br>6 | 21.5<br>6 | 21  | 21.2 |          |          |     |       |           |      |      |      |        |           |
|           |            | 62.5  | 0.19<br>1 | 0.18<br>8 | 0.<br>2 | 26.<br>5 | 26.1<br>5 | 26  | 26.3 |          |          |     |       |           |      |      |      |        |           |
|           |            | 31.25 | 0.29<br>9 | 0.30<br>3 | 0.<br>3 | 41.<br>4 | 42.1<br>4 | 43  | 42.1 |          |          |     |       |           |      |      |      |        |           |
| <b>4d</b> | <b>475</b> | 1000  | 0.01<br>8 | 0.01<br>7 | 0       | 2.4<br>9 | 2.36<br>4 | 1.8 | 2.23 | 55.<br>1 | 57       | 60  | 57.2  | 2.24<br>7 | 116  | 120  | 125  | 120.43 | 4.73<br>1 |
|           |            | 500   | 0.04      | 0.03<br>6 | 0       | 5.5<br>4 | 5.00<br>7 | 5.3 | 5.27 |          |          |     |       |           |      |      |      |        |           |
|           |            | 250   | 0.20<br>9 | 0.20<br>5 | 0.<br>2 | 28.<br>9 | 28.5<br>1 | 30  | 29   |          |          |     |       |           |      |      |      |        |           |
|           |            | 125   | 0.24<br>9 | 0.25<br>1 | 0.<br>3 | 34.<br>5 | 34.9<br>1 | 36  | 35.1 |          |          |     |       |           |      |      |      |        |           |
|           |            | 62.5  | 0.34<br>1 | 0.34<br>8 | 0.<br>3 | 47.<br>2 | 48.4      | 48  | 48   |          |          |     |       |           |      |      |      |        |           |
|           |            | 31.25 | 0.43<br>5 | 0.43<br>8 | 0.<br>4 | 60.<br>2 | 60.9<br>2 | 62  | 61.2 |          |          |     |       |           |      |      |      |        |           |
| <b>4e</b> | <b>486</b> | 1000  | 0.03<br>1 | 0.02<br>7 | 0       | 4.2<br>9 | 3.75<br>5 | 4.1 | 4.06 | 10.<br>6 | 11.<br>4 | 12  | 11.22 | 0.58<br>4 | 21.8 | 23.6 | 24.1 | 23.134 | 1.20<br>4 |
|           |            | 500   | 0.03<br>9 | 0.03<br>6 | 0       | 5.4      | 5.00<br>7 | 4.7 | 5.03 |          |          |     |       |           |      |      |      |        |           |
|           |            | 250   | 0.06<br>1 | 0.05<br>9 | 0.<br>1 | 8.4<br>5 | 8.20<br>6 | 8   | 8.2  |          |          |     |       |           |      |      |      |        |           |
|           |            | 125   | 0.06<br>9 | 0.06<br>6 | 0.<br>1 | 9.5<br>6 | 9.17<br>9 | 8.7 | 9.13 |          |          |     |       |           |      |      |      |        |           |
|           |            | 62.5  | 0.12<br>1 | 0.11<br>9 | 0.<br>1 | 16.<br>8 | 16.5<br>5 | 17  | 16.8 |          |          |     |       |           |      |      |      |        |           |
|           |            | 31.25 | 0.22<br>2 | 0.22<br>3 | 0.<br>2 | 30.<br>7 | 31.0<br>2 | 32  | 31.3 |          |          |     |       |           |      |      |      |        |           |
| <b>5</b>  | <b>533</b> | 1000  | 0.01<br>2 | 0.01<br>5 | 0       | 1.6<br>6 | 2.08<br>6 | 2   | 1.91 | 1.8<br>9 | 1.9<br>5 | 1.9 | 1.91  | 0.03<br>5 | 3.54 | 3.66 | 3.54 | 3.5807 | 0.06<br>5 |
|           |            | 500   | 0.01<br>8 | 0.01<br>6 | 0       | 2.4<br>9 | 2.22<br>5 | 2.3 | 2.33 |          |          |     |       |           |      |      |      |        |           |
|           |            | 250   | 0.02<br>4 | 0.02      | 0       | 3.3<br>2 | 2.78<br>2 | 3.1 | 3.08 |          |          |     |       |           |      |      |      |        |           |

|           |            |       |           |           |         |          |           |         |      |          |          |         |       |           |      |      |      |        |           |  |
|-----------|------------|-------|-----------|-----------|---------|----------|-----------|---------|------|----------|----------|---------|-------|-----------|------|------|------|--------|-----------|--|
|           |            | 125   | 0.06<br>4 | 0.05<br>8 | 0.<br>1 | 8.8<br>6 | 8.06<br>7 | 8.7     | 8.53 |          |          |         |       |           |      |      |      |        |           |  |
|           |            | 62.5  | 0.09<br>4 | 0.08<br>6 | 0.<br>1 | 13       | 11.9<br>6 | 13      | 12.5 |          |          |         |       |           |      |      |      |        |           |  |
|           |            | 31.25 | 0.10<br>2 | 0.1       | 0.<br>1 | 14.<br>1 | 13.9<br>1 | 14      | 14   |          |          |         |       |           |      |      |      |        |           |  |
| <b>6a</b> | <b>377</b> | 1000  | 0.01<br>9 | 0.02      | 0       | 2.6<br>3 | 2.78<br>2 | 2.8     | 2.75 | 135      | 130      | 13<br>3 | 132.6 | 2.51<br>1 | 357  | 344  | 353  | 351.21 | 6.65<br>1 |  |
|           |            | 500   | 0.05<br>2 | 0.06<br>6 | 0.<br>1 | 7.2      | 9.17<br>9 | 7.7     | 8.02 |          |          |         |       |           |      |      |      |        |           |  |
|           |            | 250   | 0.08<br>3 | 0.09<br>1 | 0.<br>1 | 11.<br>5 | 12.6<br>6 | 11      | 11.7 |          |          |         |       |           |      |      |      |        |           |  |
|           |            | 125   | 0.41<br>7 | 0.37<br>7 | 0.<br>4 | 57.<br>8 | 52.4<br>3 | 56      | 55.4 |          |          |         |       |           |      |      |      |        |           |  |
|           |            | 62.5  | 0.65<br>7 | 0.67<br>2 | 0.<br>7 | 91       | 93.4<br>6 | 95      | 93.2 |          |          |         |       |           |      |      |      |        |           |  |
|           |            | 31.25 | 0.71<br>1 | 0.71<br>9 | 0.<br>7 | 98.<br>5 | 100       | 99      | 99   |          |          |         |       |           |      |      |      |        |           |  |
| <b>6b</b> | <b>389</b> | 1000  | 0.02<br>3 | 0.01<br>9 | 0       | 3.1<br>9 | 2.64<br>3 | 2.1     | 2.65 | 97       | 94.<br>4 | 97      | 96    | 1.43<br>2 | 249  | 242  | 248  | 246.48 | 3.67<br>7 |  |
|           |            | 500   | 0.02<br>2 | 0.01<br>9 | 0       | 3.0<br>5 | 2.64<br>3 | 2.8     | 2.84 |          |          |         |       |           |      |      |      |        |           |  |
|           |            | 250   | 0.08<br>3 | 0.11      | 0.<br>1 | 11.<br>5 | 15.3      | 14      | 13.7 |          |          |         |       |           |      |      |      |        |           |  |
|           |            | 125   | 0.18<br>3 | 0.16<br>7 | 0.<br>2 | 25.<br>3 | 23.2<br>3 | 24      | 24.3 |          |          |         |       |           |      |      |      |        |           |  |
|           |            | 62.5  | 0.63<br>8 | 0.61<br>9 | 0.<br>6 | 88.<br>4 | 86.0<br>9 | 88      | 87.6 |          |          |         |       |           |      |      |      |        |           |  |
|           |            | 31.25 | 0.71<br>1 | 0.70<br>9 | 0.<br>7 | 98.<br>5 | 98.6<br>1 | 10<br>3 | 99.9 |          |          |         |       |           |      |      |      |        |           |  |
| <b>6c</b> | <b>426</b> | 1000  | 0.01<br>8 | 0.01<br>6 | 0       | 2.4<br>9 | 2.22<br>5 | 2.7     | 2.47 | 28.<br>9 | 30.<br>8 | 30      | 29.84 | 0.93      | 67.9 | 72.3 | 70.2 | 70.137 | 2.18<br>6 |  |
|           |            | 500   | 0.01<br>8 | 0.01<br>9 | 0       | 2.4<br>9 | 2.64<br>3 | 2.7     | 2.61 |          |          |         |       |           |      |      |      |        |           |  |
|           |            | 250   | 0.02      | 0.02      | 0       | 2.7<br>7 | 2.78<br>2 | 2.7     | 2.75 |          |          |         |       |           |      |      |      |        |           |  |
|           |            | 125   | 0.03<br>3 | 0.02<br>8 | 0       | 4.5<br>7 | 3.89<br>4 | 5.8     | 4.76 |          |          |         |       |           |      |      |      |        |           |  |
|           |            | 62.5  | 0.12      | 0.14      | 0.      | 17.      | 20.4      | 16      | 17.9 |          |          |         |       |           |      |      |      |        |           |  |

|           |            |       |           |           |         |          |           |         |      |          |          |         |       |           |          |          |          |        |           |
|-----------|------------|-------|-----------|-----------|---------|----------|-----------|---------|------|----------|----------|---------|-------|-----------|----------|----------|----------|--------|-----------|
|           |            |       | 8         | 7         | 1       | 7        | 5         |         |      |          |          |         |       |           |          |          |          |        |           |
|           |            | 31.25 | 0.33<br>8 | 0.35<br>7 | 0.<br>3 | 46.<br>8 | 49.6<br>5 | 49      | 48.3 |          |          |         |       |           |          |          |          |        |           |
| <b>7</b>  | <b>346</b> | 1000  | 0.02<br>8 | 0.02      | 0       | 3.8<br>8 | 2.78<br>2 | 3.1     | 3.26 | 41.<br>6 | 40.<br>6 | 40      | 40.65 | 0.97      | 120      | 117      | 115      | 117.34 | 2.8       |
|           |            | 500   | 0.01<br>9 | 0.02<br>6 | 0       | 2.6<br>3 | 3.61<br>6 | 3       | 3.08 |          |          |         |       |           |          |          |          |        |           |
|           |            | 250   | 0.02      | 0.02      | 0       | 2.7<br>7 | 2.78<br>2 | 4.8     | 3.46 |          |          |         |       |           |          |          |          |        |           |
|           |            | 125   | 0.06<br>6 | 0.08<br>1 | 0.<br>1 | 9.1<br>4 | 11.2<br>7 | 13      | 11.3 |          |          |         |       |           |          |          |          |        |           |
|           |            | 62.5  | 0.27<br>3 | 0.29<br>1 | 0.<br>3 | 37.<br>8 | 40.4<br>7 | 38      | 38.8 |          |          |         |       |           |          |          |          |        |           |
|           |            | 31.25 | 0.43<br>8 | 0.41<br>3 | 0.<br>4 | 60.<br>7 | 57.4<br>4 | 57      | 58.5 |          |          |         |       |           |          |          |          |        |           |
| <b>8</b>  | <b>388</b> | 1000  | 0.03<br>2 | 0.02<br>8 | 0       | 4.4<br>3 | 3.89<br>4 | 5.3     | 4.53 | 444      | 441      | 46<br>9 | 451.4 | 15.4      | 114<br>3 | 113<br>5 | 120<br>7 | 1161.9 | 39.6<br>3 |
|           |            | 500   | 0.26<br>7 | 0.25<br>3 | 0.<br>3 | 37       | 35.1<br>9 | 40      | 37.5 |          |          |         |       |           |          |          |          |        |           |
|           |            | 250   | 0.69<br>9 | 0.70<br>1 | 0.<br>7 | 96.<br>8 | 97.5      | 10<br>2 | 98.7 |          |          |         |       |           |          |          |          |        |           |
|           |            | 125   | 0.72<br>6 | 0.72      | 0.<br>7 | 101      | 100.<br>1 | 99      | 99.8 |          |          |         |       |           |          |          |          |        |           |
|           |            | 62.5  | 0.68<br>4 | 0.72      | 0.<br>7 | 94.<br>7 | 100.<br>1 | 10<br>2 | 98.9 |          |          |         |       |           |          |          |          |        |           |
|           |            | 31.25 | 0.71<br>8 | 0.71<br>2 | 0.<br>7 | 99.<br>4 | 99.0<br>3 | 10<br>1 | 100  |          |          |         |       |           |          |          |          |        |           |
| <b>9a</b> | <b>246</b> | 1000  | 0.01<br>8 | 0.01<br>7 | 0       | 2.4<br>9 | 2.36<br>4 | 2.4     | 2.42 | 123      | 129      | 12<br>7 | 126.2 | 2.83<br>8 | 500      | 523      | 514      | 512.23 | 11.5<br>2 |
|           |            | 500   | 0.06<br>3 | 0.04<br>8 | 0.<br>1 | 8.7<br>3 | 6.67<br>6 | 7.4     | 7.6  |          |          |         |       |           |          |          |          |        |           |
|           |            | 250   | 0.05<br>5 | 0.07<br>3 | 0.<br>1 | 7.6<br>2 | 10.1<br>5 | 8.5     | 8.76 |          |          |         |       |           |          |          |          |        |           |
|           |            | 125   | 0.35<br>2 | 0.37<br>7 | 0.<br>4 | 48.<br>8 | 52.4<br>3 | 52      | 51   |          |          |         |       |           |          |          |          |        |           |
|           |            | 62.5  | 0.71<br>3 | 0.71<br>9 | 0.<br>7 | 98.<br>8 | 100       | 10<br>1 | 99.9 |          |          |         |       |           |          |          |          |        |           |
|           |            | 31.25 | 0.72<br>1 | 0.71<br>6 | 0.<br>7 | 99.<br>9 | 99.5<br>8 | 10<br>1 | 100  |          |          |         |       |           |          |          |          |        |           |

|           |            |       |           |           |         |          |           |         |      |          |          |         |       |           |     |     |     |        |           |
|-----------|------------|-------|-----------|-----------|---------|----------|-----------|---------|------|----------|----------|---------|-------|-----------|-----|-----|-----|--------|-----------|
| <b>9b</b> | <b>260</b> | 1000  | 0.04<br>2 | 0.02<br>9 | 0       | 5.8<br>2 | 4.03<br>3 | 4.7     | 4.85 | 147      | 155      | 15<br>6 | 152.4 | 5.08<br>6 | 563 | 593 | 600 | 585.41 | 19.5<br>4 |
|           |            | 500   | 0.07<br>3 | 0.05<br>8 | 0.<br>1 | 10.<br>1 | 8.06<br>7 | 10      | 9.47 |          |          |         |       |           |     |     |     |        |           |
|           |            | 250   | 0.19<br>4 | 0.18<br>3 | 0.<br>2 | 26.<br>9 | 25.4<br>5 | 27      | 26.3 |          |          |         |       |           |     |     |     |        |           |
|           |            | 125   | 0.37<br>9 | 0.42<br>7 | 0.<br>4 | 52.<br>5 | 59.3<br>9 | 58      | 56.8 |          |          |         |       |           |     |     |     |        |           |
|           |            | 62.5  | 0.68<br>2 | 0.70<br>3 | 0.<br>7 | 94.<br>5 | 97.7<br>7 | 98      | 96.7 |          |          |         |       |           |     |     |     |        |           |
|           |            | 31.25 | 0.72<br>6 | 0.70<br>7 | 0.<br>7 | 101      | 98.3<br>3 | 98      | 99.1 |          |          |         |       |           |     |     |     |        |           |
| <b>9c</b> | <b>260</b> | 1000  | 0.01<br>7 | 0.01<br>5 | 0       | 2.3<br>5 | 2.08<br>6 | 2.3     | 2.24 | 36.<br>3 | 36.<br>6 | 37      | 36.55 | 0.21<br>1 | 140 | 140 | 141 | 140.4  | 0.80<br>9 |
|           |            | 500   | 0.01<br>8 | 0.01<br>6 | 0       | 2.4<br>9 | 2.22<br>5 | 2.7     | 2.47 |          |          |         |       |           |     |     |     |        |           |
|           |            | 250   | 0.01<br>8 | 0.01<br>8 | 0       | 2.4<br>9 | 2.50<br>3 | 3.4     | 2.8  |          |          |         |       |           |     |     |     |        |           |
|           |            | 125   | 0.04<br>4 | 0.03<br>8 | 0       | 6.0<br>9 | 5.28<br>5 | 5.1     | 5.5  |          |          |         |       |           |     |     |     |        |           |
|           |            | 62.5  | 0.08<br>9 | 0.11<br>6 | 0.<br>1 | 12.<br>3 | 16.1<br>3 | 15      | 14.5 |          |          |         |       |           |     |     |     |        |           |
|           |            | 31.25 | 0.46<br>3 | 0.45<br>1 | 0.<br>4 | 64.<br>1 | 62.7<br>3 | 64      | 63.5 |          |          |         |       |           |     |     |     |        |           |
| <b>9d</b> | <b>258</b> | 1000  | 0.04<br>8 | 0.06<br>2 | 0       | 6.6<br>5 | 8.62<br>3 | 5.5     | 6.94 | 224      | 216      | 22<br>3 | 220.9 | 4.63<br>6 | 867 | 835 | 864 | 855.27 | 17.9<br>5 |
|           |            | 500   | 0.05      | 0.05<br>8 | 0       | 6.9<br>3 | 8.06<br>7 | 6.3     | 7.08 |          |          |         |       |           |     |     |     |        |           |
|           |            | 250   | 0.28<br>9 | 0.23<br>4 | 0.<br>3 | 40       | 32.5<br>5 | 38      | 36.7 |          |          |         |       |           |     |     |     |        |           |
|           |            | 125   | 0.67<br>2 | 0.69<br>9 | 0.<br>7 | 93.<br>1 | 97.2<br>2 | 97      | 95.8 |          |          |         |       |           |     |     |     |        |           |
|           |            | 62.5  | 0.71<br>6 | 0.71<br>1 | 0.<br>7 | 99.<br>2 | 98.8<br>9 | 10<br>1 | 99.7 |          |          |         |       |           |     |     |     |        |           |
|           |            | 31.25 | 0.72<br>7 | 0.70<br>3 | 0.<br>7 | 101      | 97.7<br>7 | 10<br>1 | 99.7 |          |          |         |       |           |     |     |     |        |           |
| <b>9e</b> | <b>334</b> | 1000  | 0.05<br>2 | 0.03<br>8 | 0       | 7.2      | 5.28<br>5 | 7       | 6.48 | 84.<br>6 | 86.<br>2 | 85      | 85.32 | 0.80<br>5 | 253 | 258 | 255 | 255.14 | 2.40<br>6 |
|           |            | 500   | 0.03      | 0.05      | 0.      | 4.9      | 8.06      | 7.2     | 6.77 |          |          |         |       |           |     |     |     |        |           |

|                       |            |       |           |           |         |          |           |     |      |          |          |     |      |           |      |      |      |        |           |
|-----------------------|------------|-------|-----------|-----------|---------|----------|-----------|-----|------|----------|----------|-----|------|-----------|------|------|------|--------|-----------|
|                       |            |       | 6         | 8         | 1       | 9        | 7         |     |      |          |          |     |      |           |      |      |      |        |           |
|                       |            | 250   | 0.11<br>7 | 0.14<br>3 | 0.<br>1 | 16.<br>2 | 19.8<br>9 | 18  | 18.1 |          |          |     |      |           |      |      |      |        |           |
|                       |            | 125   | 0.27<br>3 | 0.28<br>8 | 0.<br>3 | 37.<br>8 | 40.0<br>6 | 37  | 38.3 |          |          |     |      |           |      |      |      |        |           |
|                       |            | 62.5  | 0.38<br>8 | 0.36<br>8 | 0.<br>4 | 53.<br>7 | 51.1<br>8 | 51  | 52   |          |          |     |      |           |      |      |      |        |           |
|                       |            | 31.25 | 0.67<br>2 | 0.65<br>9 | 0.<br>7 | 93.<br>1 | 91.6<br>6 | 97  | 93.9 |          |          |     |      |           |      |      |      |        |           |
| <b>erlotini<br/>b</b> | <b>393</b> | 1000  | 0.01<br>8 | 0.03<br>3 | 0       | 2.4<br>9 | 4.59      | 3.8 | 3.64 | 5.2<br>2 | 4.8<br>5 | 4.5 | 4.84 | 0.38<br>5 | 13.3 | 12.3 | 11.3 | 12.302 | 0.97<br>9 |
|                       |            | 50    | 0.02      | 0.03<br>1 | 0       | 2.7<br>7 | 4.31<br>2 | 4.1 | 3.73 |          |          |     |      |           |      |      |      |        |           |
|                       |            | 25    | 0.02<br>5 | 0.02<br>7 | 0       | 3.4<br>6 | 3.75<br>5 | 4.3 | 3.83 |          |          |     |      |           |      |      |      |        |           |
|                       |            | 12.5  | 0.06<br>3 | 0.05<br>8 | 0.<br>1 | 8.7<br>3 | 8.06<br>7 | 9.9 | 8.91 |          |          |     |      |           |      |      |      |        |           |
|                       |            | 6.25  | 0.07      | 0.07<br>9 | 0.<br>1 | 9.7      | 10.9<br>9 | 12  | 10.7 |          |          |     |      |           |      |      |      |        |           |
|                       |            | 3.125 | 0.14<br>4 | 0.15<br>2 | 0.<br>2 | 19.<br>9 | 21.1<br>4 | 21  | 20.8 |          |          |     |      |           |      |      |      |        |           |

**Table S. 2:** The viability percentage for 6 concentrations ( $\mu\text{M}$ ) for each compound and their  $\text{IC}_{50}$  on MDA-MB-231 cell line.

| ID         | Mwt    | ug/ml       | O.D   |       |       | Viability % |          |        | Mean Viability % | IC50 ug/ml |      |       | Mean IC50 ug/ml | SD    | IC50 UM |       |        | Mean IC50 Um | SD     |
|------------|--------|-------------|-------|-------|-------|-------------|----------|--------|------------------|------------|------|-------|-----------------|-------|---------|-------|--------|--------------|--------|
|            |        |             |       |       |       |             |          |        |                  |            |      |       |                 |       |         |       |        |              |        |
| MDA-MB-231 |        | -----<br>-- | 0.648 | 0.666 | 0.651 | 100         | 100      | 100    | 100              |            |      |       |                 |       |         |       |        |              |        |
| 4a         | 409.4  | 1000        | 0.088 | 0.082 | 0.086 | 13.58025    | 12.31231 | 13.21  | 13.0343          | 9.52       | 9.65 | 9.82  | 9.663           | 0.15  | 23.3    | 23.6  | 23.99  | 23.604       | 0.3675 |
|            |        | 500         | 0.091 | 0.09  | 0.088 | 14.04321    | 13.51351 | 13.518 | 13.6915          |            |      |       |                 |       |         |       |        |              |        |
|            |        | 250         | 0.116 | 0.111 | 0.113 | 17.90123    | 16.66667 | 17.358 | 17.3086          |            |      |       |                 |       |         |       |        |              |        |
|            |        | 125         | 0.149 | 0.154 | 0.152 | 22.99383    | 23.12312 | 23.349 | 23.1552          |            |      |       |                 |       |         |       |        |              |        |
|            |        | 62.5        | 0.211 | 0.217 | 0.219 | 32.56173    | 32.58258 | 33.641 | 32.9283          |            |      |       |                 |       |         |       |        |              |        |
|            |        | 31.25       | 0.239 | 0.239 | 0.235 | 36.88272    | 35.88589 | 36.098 | 36.289           |            |      |       |                 |       |         |       |        |              |        |
| 4b         | 430.46 | 1000        | 0.009 | 0.005 | 0.007 | 1.388889    | 0.750751 | 1.0753 | 1.07164          | 5.39       | 4.59 | 5.235 | 5.072           | 0.424 | 12.52   | 10.66 | 12.161 | 11.782       | 0.9856 |
|            |        | 500         | 0.008 | 0.006 | 0.009 | 1.234568    | 0.900901 | 1.3825 | 1.17265          |            |      |       |                 |       |         |       |        |              |        |
|            |        | 250         | 0.011 | 0.015 | 0.01  | 1.697531    | 2.252252 | 1.5361 | 1.82863          |            |      |       |                 |       |         |       |        |              |        |
|            |        | 125         | 0.029 | 0.034 | 0.03  | 4.475309    | 5.105105 | 4.6083 | 4.72957          |            |      |       |                 |       |         |       |        |              |        |
|            |        | 62.5        | 0.064 | 0.061 | 0.069 | 9.876543    | 9.159159 | 10.599 | 9.87826          |            |      |       |                 |       |         |       |        |              |        |
|            |        | 31.25       | 0.101 | 0.099 | 0.101 | 15.58642    | 14.86486 | 15.515 | 15.322           |            |      |       |                 |       |         |       |        |              |        |
| 4c         | 440.5  | 1000        | 0.022 | 0.031 | 0.017 | 3.395062    | 4.654655 | 2.6114 | 3.55369          | 3.31       | 3.97 | 3.96  | 3.747           | 0.378 | 7.514   | 9.012 | 8.9898 | 8.5055       | 0.8586 |



|           |                    |           |           |           |           |              |              |            |             |           |           |           |       |           |           |           |            |            |            |
|-----------|--------------------|-----------|-----------|-----------|-----------|--------------|--------------|------------|-------------|-----------|-----------|-----------|-------|-----------|-----------|-----------|------------|------------|------------|
|           |                    | 500       | 0.0<br>33 | 0.0<br>29 | 0.0<br>22 | 5.0925<br>93 | 4.3543<br>54 | 3.37<br>94 | 4.2754<br>5 |           |           |           |       |           |           |           |            |            |            |
|           |                    | 250       | 0.0<br>41 | 0.0<br>44 | 0.0<br>37 | 6.3271<br>6  | 6.6066<br>07 | 5.68<br>36 | 6.2057<br>8 |           |           |           |       |           |           |           |            |            |            |
|           |                    | 125       | 0.0<br>6  | 0.0<br>61 | 0.0<br>55 | 9.2592<br>59 | 9.1591<br>59 | 8.44<br>85 | 8.9556<br>5 |           |           |           |       |           |           |           |            |            |            |
|           |                    | 62.5      | 0.1<br>18 | 0.1<br>16 | 0.1<br>11 | 18.209<br>88 | 17.417<br>42 | 17.0<br>51 | 17.559<br>3 |           |           |           |       |           |           |           |            |            |            |
|           |                    | 31.2<br>5 | 0.1<br>28 | 0.1<br>42 | 0.1<br>32 | 19.753<br>09 | 21.321<br>32 | 20.2<br>76 | 20.450<br>3 |           |           |           |       |           |           |           |            |            |            |
| <b>4d</b> | <b>474.9<br/>4</b> | 1000      | 0.1<br>13 | 0.1<br>11 | 0.1<br>12 | 17.438<br>27 | 16.666<br>67 | 17.2<br>04 | 17.103<br>1 | 38.<br>55 | 36.<br>43 | 37        | 37.33 | 1.0<br>97 | 81.<br>17 | 76.<br>7  | 77.9<br>05 | 78.5<br>92 | 2.31       |
|           |                    | 500       | 0.1<br>25 | 0.1<br>27 | 0.1<br>29 | 19.290<br>12 | 19.069<br>07 | 19.8<br>16 | 19.391<br>6 |           |           |           |       |           |           |           |            |            |            |
|           |                    | 250       | 0.1<br>41 | 0.1<br>39 | 0.1<br>37 | 21.759<br>26 | 20.870<br>87 | 21.0<br>45 | 21.224<br>9 |           |           |           |       |           |           |           |            |            |            |
|           |                    | 125       | 0.2<br>03 | 0.2<br>04 | 0.1<br>99 | 31.327<br>16 | 30.630<br>63 | 30.5<br>68 | 30.842      |           |           |           |       |           |           |           |            |            |            |
|           |                    | 62.5      | 0.3<br>07 | 0.3<br>11 | 0.3<br>08 | 47.376<br>54 | 46.696<br>7  | 47.3<br>12 | 47.128<br>4 |           |           |           |       |           |           |           |            |            |            |
|           |                    | 31.2<br>5 | 0.3<br>41 | 0.3<br>44 | 0.3<br>38 | 52.623<br>46 | 51.651<br>65 | 51.9<br>2  | 52.065<br>1 |           |           |           |       |           |           |           |            |            |            |
| <b>4e</b> | <b>485.5</b>       | 1000      | 0.0<br>68 | 0.0<br>69 | 0.0<br>83 | 10.493<br>83 | 10.360<br>36 | 12.7<br>5  | 11.201<br>3 | 12.<br>89 | 11.<br>77 | 10.<br>67 | 11.78 | 1.1<br>1  | 26.<br>58 | 24.<br>27 | 22         | 24.2<br>82 | 2.28<br>87 |
|           |                    | 500       | 0.0<br>98 | 0.0<br>99 | 0.0<br>87 | 15.123<br>46 | 14.864<br>86 | 13.3<br>64 | 14.450<br>8 |           |           |           |       |           |           |           |            |            |            |
|           |                    | 250       | 0.0<br>83 | 0.0<br>83 | 0.1<br>07 | 12.808<br>64 | 12.462<br>46 | 16.4<br>36 | 13.902<br>5 |           |           |           |       |           |           |           |            |            |            |
|           |                    | 125       | 0.1<br>53 | 0.1<br>53 | 0.1<br>6  | 23.611<br>11 | 22.972<br>97 | 24.5<br>78 | 23.720<br>6 |           |           |           |       |           |           |           |            |            |            |
|           |                    | 62.5      | 0.2<br>21 | 0.2<br>23 | 0.1<br>99 | 34.104<br>94 | 33.483<br>48 | 30.5<br>68 | 32.718<br>9 |           |           |           |       |           |           |           |            |            |            |
|           |                    | 31.2<br>5 | 0.2<br>42 | 0.2<br>42 | 0.2<br>47 | 37.345<br>68 | 36.336<br>34 | 37.9<br>42 | 37.207<br>9 |           |           |           |       |           |           |           |            |            |            |
| <b>5</b>  | <b>533.4<br/>2</b> | 1000      | 0.0<br>99 | 0.0<br>88 | 0.1<br>09 | 15.277<br>78 | 13.213<br>21 | 16.7<br>43 | 15.078<br>2 | 25.<br>61 | 26.<br>41 | 23.<br>61 | 25.21 | 1.4<br>42 | 48.<br>01 | 49.<br>51 | 44.2<br>62 | 47.2<br>61 | 2.70<br>37 |
|           |                    | 500       | 0.1<br>27 | 0.1<br>33 | 0.1<br>32 | 19.598<br>77 | 19.969<br>97 | 20.2<br>76 | 19.948<br>4 |           |           |           |       |           |           |           |            |            |            |

|           |                    |           |           |           |           |              |              |            |             |           |           |           |       |           |           |           |            |            |            |
|-----------|--------------------|-----------|-----------|-----------|-----------|--------------|--------------|------------|-------------|-----------|-----------|-----------|-------|-----------|-----------|-----------|------------|------------|------------|
|           |                    | 250       | 0.1<br>51 | 0.1<br>49 | 0.1<br>47 | 23.302<br>47 | 22.372<br>37 | 22.5<br>81 | 22.751<br>8 |           |           |           |       |           |           |           |            |            |            |
|           |                    | 125       | 0.2<br>23 | 0.2<br>28 | 0.1<br>19 | 34.413<br>58 | 34.234<br>23 | 18.2<br>8  | 28.975<br>8 |           |           |           |       |           |           |           |            |            |            |
|           |                    | 62.5      | 0.2<br>43 | 0.2<br>79 | 0.2<br>61 | 37.5         | 41.891<br>89 | 40.0<br>92 | 39.828      |           |           |           |       |           |           |           |            |            |            |
|           |                    | 31.2<br>5 | 0.3<br>15 | 0.3<br>05 | 0.3<br>26 | 48.611<br>11 | 45.795<br>8  | 50.0<br>77 | 48.161<br>2 |           |           |           |       |           |           |           |            |            |            |
| <b>6a</b> | <b>377.4<br/>6</b> | 1000      | 0.0<br>25 | 0.0<br>36 | 0.0<br>32 | 3.8580<br>25 | 5.4054<br>05 | 4.91<br>55 | 4.7263<br>1 | 129<br>.2 | 120<br>.8 | 125       | 125   | 4.2       | 342<br>.3 | 320       | 331.<br>16 | 331.<br>16 | 11.1<br>27 |
|           |                    | 500       | 0.0<br>55 | 0.0<br>73 | 0.0<br>68 | 8.4876<br>54 | 10.960<br>96 | 10.4<br>45 | 9.9646<br>9 |           |           |           |       |           |           |           |            |            |            |
|           |                    | 250       | 0.1<br>38 | 0.1<br>53 | 0.1<br>6  | 21.296<br>3  | 22.972<br>97 | 24.5<br>78 | 22.948<br>9 |           |           |           |       |           |           |           |            |            |            |
|           |                    | 125       | 0.3<br>19 | 0.2<br>76 | 0.2<br>88 | 49.228<br>4  | 41.441<br>44 | 44.2<br>4  | 44.969<br>8 |           |           |           |       |           |           |           |            |            |            |
|           |                    | 62.5      | 0.5<br>51 | 0.5<br>68 | 0.5<br>42 | 85.030<br>86 | 85.285<br>29 | 83.2<br>57 | 84.524<br>2 |           |           |           |       |           |           |           |            |            |            |
|           |                    | 31.2<br>5 | 0.6<br>49 | 0.6<br>21 | 0.6<br>3  | 100.15<br>43 | 93.243<br>24 | 96.7<br>74 | 96.723<br>9 |           |           |           |       |           |           |           |            |            |            |
| <b>6b</b> | <b>389.4<br/>7</b> | 1000      | 0.0<br>18 | 0.0<br>19 | 0.0<br>16 | 2.7777<br>78 | 2.8528<br>53 | 2.45<br>78 | 2.6961<br>3 | 93.<br>63 | 92.<br>65 | 95.<br>36 | 93.88 | 1.3<br>72 | 240<br>.4 | 237<br>.9 | 244.<br>85 | 241.<br>05 | 3.52<br>32 |
|           |                    | 500       | 0.0<br>18 | 0.0<br>19 | 0.0<br>22 | 2.7777<br>78 | 2.8528<br>53 | 3.37<br>94 | 3.0033<br>5 |           |           |           |       |           |           |           |            |            |            |
|           |                    | 250       | 0.0<br>41 | 0.0<br>28 | 0.0<br>46 | 6.3271<br>6  | 4.2042<br>04 | 7.06<br>61 | 5.8658<br>1 |           |           |           |       |           |           |           |            |            |            |
|           |                    | 125       | 0.1<br>3  | 0.1<br>26 | 0.1<br>45 | 20.061<br>73 | 18.918<br>92 | 22.2<br>73 | 20.418      |           |           |           |       |           |           |           |            |            |            |
|           |                    | 62.5      | 0.5<br>77 | 0.5<br>93 | 0.5<br>82 | 89.043<br>21 | 89.039<br>04 | 89.4<br>01 | 89.161<br>1 |           |           |           |       |           |           |           |            |            |            |
|           |                    | 31.2<br>5 | 0.6<br>6  | 0.6<br>52 | 0.6<br>5  | 101.85<br>19 | 97.897<br>9  | 99.8<br>46 | 99.865<br>4 |           |           |           |       |           |           |           |            |            |            |
| <b>6c</b> | <b>425.5</b>       | 1000      | 0.0<br>18 | 0.0<br>18 | 0.0<br>2  | 2.7777<br>78 | 2.7027<br>03 | 3.07<br>22 | 2.8508<br>9 | 39.<br>38 | 35.<br>77 | 38.<br>41 | 37.85 | 1.8<br>68 | 92.<br>55 | 84.<br>07 | 90.2<br>7  | 88.9<br>62 | 4.39<br>08 |
|           |                    | 500       | 0.0<br>33 | 0.0<br>23 | 0.0<br>27 | 5.0925<br>93 | 3.4534<br>53 | 4.14<br>75 | 4.2311<br>7 |           |           |           |       |           |           |           |            |            |            |
|           |                    | 250       | 0.0<br>33 | 0.0<br>48 | 0.0<br>51 | 5.0925<br>93 | 7.2072<br>07 | 7.83<br>41 | 6.7113      |           |           |           |       |           |           |           |            |            |            |

|    |            |           |           |           |           |              |              |            |             |           |           |           |       |           |           |           |            |            |            |
|----|------------|-----------|-----------|-----------|-----------|--------------|--------------|------------|-------------|-----------|-----------|-----------|-------|-----------|-----------|-----------|------------|------------|------------|
|    |            | 125       | 0.0<br>62 | 0.0<br>49 | 0.0<br>55 | 9.5679<br>01 | 7.3573<br>57 | 8.44<br>85 | 8.4579<br>3 |           |           |           |       |           |           |           |            |            |            |
|    |            | 62.5      | 0.1<br>38 | 0.1<br>24 | 0.1<br>52 | 21.296<br>3  | 18.618<br>62 | 23.3<br>49 | 21.087<br>9 |           |           |           |       |           |           |           |            |            |            |
|    |            | 31.2<br>5 | 0.4<br>29 | 0.3<br>98 | 0.4<br>11 | 66.203<br>7  | 59.759<br>76 | 63.1<br>34 | 63.032<br>4 |           |           |           |       |           |           |           |            |            |            |
| 7  | 346.4<br>1 | 1000      | 0.0<br>27 | 0.0<br>46 | 0.0<br>33 | 4.1666<br>67 | 6.9069<br>07 | 5.06<br>91 | 5.3809      | 77.<br>19 | 73.<br>3  | 77.<br>6  | 76.03 | 2.3<br>73 | 222<br>.8 | 211<br>.6 | 224.<br>01 | 219.<br>48 | 6.85<br>06 |
|    |            | 500       | 0.0<br>2  | 0.0<br>18 | 0.0<br>18 | 3.0864<br>2  | 2.7027<br>03 | 2.76<br>5  | 2.8513<br>7 |           |           |           |       |           |           |           |            |            |            |
|    |            | 250       | 0.0<br>19 | 0.0<br>19 | 0.0<br>19 | 2.9320<br>99 | 2.8528<br>53 | 2.91<br>86 | 2.9011<br>8 |           |           |           |       |           |           |           |            |            |            |
|    |            | 125       | 0.0<br>73 | 0.0<br>89 | 0.1<br>03 | 11.265<br>43 | 13.363<br>36 | 15.8<br>22 | 13.483<br>5 |           |           |           |       |           |           |           |            |            |            |
|    |            | 62.5      | 0.4<br>72 | 0.4<br>39 | 0.4<br>52 | 72.839<br>51 | 65.915<br>92 | 69.4<br>32 | 69.395<br>7 |           |           |           |       |           |           |           |            |            |            |
|    |            | 31.2<br>5 | 0.6<br>19 | 0.5<br>99 | 0.6<br>34 | 95.524<br>69 | 89.939<br>94 | 97.3<br>89 | 94.284<br>4 |           |           |           |       |           |           |           |            |            |            |
| 8  | 388.4<br>9 | 1000      | 0.0<br>22 | 0.0<br>15 | 0.0<br>17 | 3.3950<br>62 | 2.2522<br>52 | 2.61<br>14 | 2.7528<br>9 | 257       | 253       | 251<br>.8 | 253.9 | 2.7<br>23 | 661<br>.5 | 651<br>.2 | 648.<br>15 | 653.<br>64 | 7.00<br>85 |
|    |            | 500       | 0.0<br>96 | 0.1<br>12 | 0.1<br>09 | 14.814<br>81 | 16.816<br>82 | 16.7<br>43 | 16.125      |           |           |           |       |           |           |           |            |            |            |
|    |            | 250       | 0.3<br>28 | 0.3<br>33 | 0.3<br>12 | 50.617<br>28 | 50           | 47.9<br>26 | 49.514<br>5 |           |           |           |       |           |           |           |            |            |            |
|    |            | 125       | 0.6<br>2  | 0.5<br>98 | 0.6<br>13 | 95.679<br>01 | 89.789<br>79 | 94.1<br>63 | 93.210<br>5 |           |           |           |       |           |           |           |            |            |            |
|    |            | 62.5      | 0.6<br>57 | 0.6<br>53 | 0.6<br>44 | 101.38<br>89 | 98.048<br>05 | 98.9<br>25 | 99.453<br>9 |           |           |           |       |           |           |           |            |            |            |
|    |            | 31.2<br>5 | 0.6<br>55 | 0.6<br>6  | 0.6<br>5  | 101.08<br>02 | 99.099<br>1  | 99.8<br>46 | 100.00<br>9 |           |           |           |       |           |           |           |            |            |            |
| 9a | 246.3<br>1 | 1000      | 0.0<br>15 | 0.0<br>17 | 0.0<br>16 | 2.3148<br>15 | 2.5525<br>53 | 2.45<br>78 | 2.4417<br>1 | 189<br>.5 | 189<br>.7 | 186<br>.8 | 188.7 | 1.6<br>2  | 769<br>.4 | 770<br>.2 | 758.<br>39 | 765.<br>97 | 6.57<br>57 |
|    |            | 500       | 0.0<br>52 | 0.0<br>38 | 0.0<br>49 | 8.0246<br>91 | 5.7057<br>06 | 7.52<br>69 | 7.0857<br>6 |           |           |           |       |           |           |           |            |            |            |
|    |            | 250       | 0.2<br>17 | 0.2<br>2  | 0.1<br>98 | 33.487<br>65 | 33.033<br>03 | 30.4<br>15 | 32.311<br>8 |           |           |           |       |           |           |           |            |            |            |
|    |            | 125       | 0.4<br>89 | 0.5<br>12 | 0.5<br>02 | 75.462<br>96 | 76.876<br>88 | 77.1<br>12 | 76.484      |           |           |           |       |           |           |           |            |            |            |

|           |                    |           |           |           |           |              |              |            |             |           |           |           |       |           |           |           |            |            |            |  |
|-----------|--------------------|-----------|-----------|-----------|-----------|--------------|--------------|------------|-------------|-----------|-----------|-----------|-------|-----------|-----------|-----------|------------|------------|------------|--|
|           |                    | 62.5      | 0.6<br>17 | 0.6<br>39 | 0.6<br>32 | 95.216<br>05 | 95.945<br>95 | 97.0<br>81 | 96.081<br>1 |           |           |           |       |           |           |           |            |            |            |  |
|           |                    | 31.2<br>5 | 0.6<br>53 | 0.6<br>61 | 0.6<br>5  | 100.77<br>16 | 99.249<br>25 | 99.8<br>46 | 99.955<br>7 |           |           |           |       |           |           |           |            |            |            |  |
| <b>9b</b> | <b>260.3<br/>3</b> | 1000      | 0.0<br>16 | 0.0<br>23 | 0.0<br>18 | 2.4691<br>36 | 3.4534<br>53 | 2.76<br>5  | 2.8958<br>6 | 215<br>.8 | 204<br>.6 | 211<br>.3 | 210.6 | 5.6<br>36 | 828<br>.9 | 785<br>.9 | 811.<br>66 | 808.<br>85 | 21.6<br>49 |  |
|           |                    | 500       | 0.0<br>7  | 0.0<br>92 | 0.0<br>78 | 10.802<br>47 | 13.813<br>81 | 11.9<br>82 | 12.199<br>3 |           |           |           |       |           |           |           |            |            |            |  |
|           |                    | 250       | 0.2<br>41 | 0.2<br>25 | 0.2<br>3  | 37.191<br>36 | 33.783<br>78 | 35.3<br>3  | 35.435<br>1 |           |           |           |       |           |           |           |            |            |            |  |
|           |                    | 125       | 0.5<br>73 | 0.5<br>53 | 0.5<br>69 | 88.425<br>93 | 83.033<br>03 | 87.4<br>04 | 86.287<br>7 |           |           |           |       |           |           |           |            |            |            |  |
|           |                    | 62.5      | 0.6<br>6  | 0.6<br>52 | 0.6<br>48 | 101.85<br>19 | 97.897<br>9  | 99.5<br>39 | 99.763      |           |           |           |       |           |           |           |            |            |            |  |
|           |                    | 31.2<br>5 | 0.6<br>59 | 0.6<br>42 | 0.6<br>43 | 101.69<br>75 | 96.396<br>4  | 98.7<br>71 | 98.955      |           |           |           |       |           |           |           |            |            |            |  |
| <b>9c</b> | <b>260.3<br/>3</b> | 1000      | 0.0<br>21 | 0.0<br>18 | 0.0<br>19 | 3.2407<br>41 | 2.7027<br>03 | 2.91<br>86 | 2.9540<br>1 | 48.<br>41 | 46.<br>74 | 50.<br>17 | 48.44 | 1.7<br>15 | 186       | 179<br>.5 | 192.<br>72 | 186.<br>07 | 6.58<br>85 |  |
|           |                    | 500       | 0.0<br>32 | 0.0<br>47 | 0.0<br>36 | 4.9382<br>72 | 7.0570<br>57 | 5.53       | 5.8417<br>6 |           |           |           |       |           |           |           |            |            |            |  |
|           |                    | 250       | 0.0<br>55 | 0.0<br>32 | 0.0<br>47 | 8.4876<br>54 | 4.8048<br>05 | 7.21<br>97 | 6.8373<br>7 |           |           |           |       |           |           |           |            |            |            |  |
|           |                    | 125       | 0.0<br>62 | 0.0<br>58 | 0.0<br>63 | 9.5679<br>01 | 8.7087<br>09 | 9.67<br>74 | 9.3180<br>1 |           |           |           |       |           |           |           |            |            |            |  |
|           |                    | 62.5      | 0.1<br>52 | 0.1<br>58 | 0.1<br>72 | 23.456<br>79 | 23.723<br>72 | 26.4<br>21 | 24.533<br>8 |           |           |           |       |           |           |           |            |            |            |  |
|           |                    | 31.2<br>5 | 0.5<br>83 | 0.5<br>63 | 0.5<br>99 | 89.969<br>14 | 84.534<br>53 | 92.0<br>12 | 88.838<br>7 |           |           |           |       |           |           |           |            |            |            |  |
| <b>9d</b> | <b>258.3<br/>2</b> | 1000      | 0.0<br>16 | 0.0<br>25 | 0.0<br>2  | 2.4691<br>36 | 3.7537<br>54 | 3.07<br>22 | 3.0983<br>6 | 153<br>.6 | 156<br>.4 | 158<br>.5 | 156.2 | 2.4<br>58 | 594<br>.6 | 605<br>.5 | 613.<br>58 | 604.<br>55 | 9.51<br>66 |  |
|           |                    | 500       | 0.0<br>28 | 0.0<br>44 | 0.0<br>32 | 4.3209<br>88 | 6.6066<br>07 | 4.91<br>55 | 5.2810<br>4 |           |           |           |       |           |           |           |            |            |            |  |
|           |                    | 250       | 0.1<br>18 | 0.1<br>47 | 0.1<br>32 | 18.209<br>88 | 22.072<br>07 | 20.2<br>76 | 20.186<br>1 |           |           |           |       |           |           |           |            |            |            |  |
|           |                    | 125       | 0.4<br>26 | 0.4<br>31 | 0.4<br>4  | 65.740<br>74 | 64.714<br>71 | 67.5<br>88 | 66.014<br>6 |           |           |           |       |           |           |           |            |            |            |  |
|           |                    | 62.5      | 0.6<br>58 | 0.6<br>43 | 0.6<br>51 | 101.54<br>32 | 96.546<br>55 | 100        | 99.363<br>3 |           |           |           |       |           |           |           |            |            |            |  |

|                       |                    |           |           |           |           |              |              |            |             |           |           |           |       |           |           |           |            |            |            |  |
|-----------------------|--------------------|-----------|-----------|-----------|-----------|--------------|--------------|------------|-------------|-----------|-----------|-----------|-------|-----------|-----------|-----------|------------|------------|------------|--|
|                       |                    | 31.2<br>5 | 0.6<br>63 | 0.6<br>47 | 0.6<br>49 | 102.31<br>48 | 97.147<br>15 | 99.6<br>93 | 99.718<br>2 |           |           |           |       |           |           |           |            |            |            |  |
| <b>9e</b>             | <b>334.4<br/>2</b> | 1000      | 0.0<br>19 | 0.0<br>17 | 0.0<br>18 | 2.9320<br>99 | 2.5525<br>53 | 2.76<br>5  | 2.7498<br>8 | 195<br>.2 | 190<br>.1 | 196<br>.2 | 193.8 | 3.2<br>72 | 583<br>.7 | 568<br>.4 | 586.<br>69 | 579.<br>61 | 9.78<br>29 |  |
|                       |                    | 500       | 0.0<br>79 | 0.0<br>93 | 0.0<br>83 | 12.191<br>36 | 13.963<br>96 | 12.7<br>5  | 12.968<br>3 |           |           |           |       |           |           |           |            |            |            |  |
|                       |                    | 250       | 0.1<br>62 | 0.1<br>66 | 0.1<br>83 | 25           | 24.924<br>92 | 28.1<br>11 | 26.011<br>8 |           |           |           |       |           |           |           |            |            |            |  |
|                       |                    | 125       | 0.5<br>83 | 0.5<br>69 | 0.5<br>6  | 89.969<br>14 | 85.435<br>44 | 86.0<br>22 | 87.142      |           |           |           |       |           |           |           |            |            |            |  |
|                       |                    | 62.5      | 0.6<br>46 | 0.6<br>57 | 0.6<br>52 | 99.691<br>36 | 98.648<br>65 | 100.<br>15 | 99.497<br>9 |           |           |           |       |           |           |           |            |            |            |  |
|                       |                    | 31.2<br>5 | 0.6<br>58 | 0.6<br>57 | 0.6<br>5  | 101.54<br>32 | 98.648<br>65 | 99.8<br>46 | 100.01<br>3 |           |           |           |       |           |           |           |            |            |            |  |
| <b>Erlot<br/>inib</b> | <b>393.4<br/>4</b> | 1000      | 0.0<br>17 | 0.0<br>22 | 0.0<br>21 | 2.6234<br>57 | 3.3033<br>03 | 3.22<br>58 | 3.0508<br>6 | 4.2<br>7  | 4.8<br>7  | 4.0<br>16 | 4.385 | 0.4<br>39 | 10.<br>85 | 12.<br>38 | 10.2<br>08 | 11.1<br>46 | 1.11<br>46 |  |
|                       |                    | 50        | 0.0<br>31 | 0.0<br>19 | 0.0<br>25 | 4.7839<br>51 | 2.8528<br>53 | 3.84<br>02 | 3.8256<br>8 |           |           |           |       |           |           |           |            |            |            |  |
|                       |                    | 25        | 0.0<br>51 | 0.0<br>38 | 0.0<br>4  | 7.8703<br>7  | 5.7057<br>06 | 6.14<br>44 | 6.5734<br>9 |           |           |           |       |           |           |           |            |            |            |  |
|                       |                    | 12.5      | 0.0<br>73 | 0.0<br>69 | 0.0<br>83 | 11.265<br>43 | 10.360<br>36 | 12.7<br>5  | 11.458<br>5 |           |           |           |       |           |           |           |            |            |            |  |
|                       |                    | 6.25      | 0.1<br>28 | 0.1<br>42 | 0.1<br>32 | 19.753<br>09 | 21.321<br>32 | 20.2<br>76 | 20.450<br>3 |           |           |           |       |           |           |           |            |            |            |  |
|                       |                    | 3.12<br>5 | 0.1<br>4  | 0.1<br>36 | 0.1<br>33 | 21.604<br>94 | 20.420<br>42 | 20.4<br>3  | 20.818<br>5 |           |           |           |       |           |           |           |            |            |            |  |

**Table S.3:** The viability percentage ( $\mu\text{M}$ ) for compound **5** and erlotinib showing their  $\text{IC}_{50}$  on HCT-116 cell line.

| ID               | Mwt          | ug/ml       | O.D       |           |           | Viability % |          |          | Mean Viability % | IC50 ug/ml |           |           | MeanIC 50 ug/ml | SD        | IC50 UM   |           |            | MeanIC 50 UM | SD         |
|------------------|--------------|-------------|-----------|-----------|-----------|-------------|----------|----------|------------------|------------|-----------|-----------|-----------------|-----------|-----------|-----------|------------|--------------|------------|
|                  |              |             |           |           |           |             |          |          |                  |            |           |           |                 |           |           |           |            |              |            |
| <b>HCT-116</b>   |              | -----<br>-- | 0.50<br>2 | 0.49<br>7 | 0.47<br>9 | 100         | 10<br>0  | 10<br>0  | 100              |            |           |           |                 |           |           |           |            |              |            |
| <b>5</b>         | <b>533.4</b> | 100         | 0.16<br>3 | 0.17<br>7 | 0.15<br>7 | 32.47       | 35.<br>6 | 32.<br>8 | 33.62            | 10.9<br>1  | 10.4<br>2 | 10.3<br>7 | 10.57           | 0.29<br>8 | 20.4<br>5 | 19.5<br>3 | 19.44<br>1 | 19.8092<br>8 | 0.559<br>4 |
|                  |              | 25          | 0.22<br>7 | 0.19      | 0.22<br>5 | 45.21<br>9  | 38.<br>2 | 47       | 43.47            |            |           |           |                 |           |           |           |            |              |            |
|                  |              | 6.3         | 0.24<br>2 | 0.24<br>6 | 0.24<br>9 | 48.20<br>7  | 49.<br>5 | 52       | 49.9             |            |           |           |                 |           |           |           |            |              |            |
|                  |              | 1.6         | 0.31<br>4 | 0.31<br>1 | 0.28<br>7 | 62.55       | 62.<br>6 | 59.<br>9 | 61.68            |            |           |           |                 |           |           |           |            |              |            |
|                  |              | 0.4         | 0.32<br>4 | 0.32<br>6 | 0.3       | 64.54<br>2  | 65.<br>6 | 62.<br>6 | 64.26            |            |           |           |                 |           |           |           |            |              |            |
|                  |              | 0.2         | 0.33<br>9 | 0.34      | 0.29<br>8 | 67.53       | 68.<br>4 | 62.<br>2 | 66.05            |            |           |           |                 |           |           |           |            |              |            |
| <b>erlotinib</b> | <b>393.4</b> | 100         | 0.13<br>1 | 0.12<br>9 | 0.14<br>4 | 26.09<br>6  | 26       | 30.<br>1 | 27.37            | 6.55       | 7.02      | 7.46      | 7.013           | 0.45<br>5 | 16.6<br>5 | 17.8<br>4 | 18.96<br>1 | 17.8173<br>8 | 1.156<br>7 |
|                  |              | 25          | 0.15<br>9 | 0.15<br>5 | 0.16<br>5 | 31.67<br>3  | 31.<br>2 | 34.<br>4 | 32.44            |            |           |           |                 |           |           |           |            |              |            |
|                  |              | 6.3         | 0.22<br>5 | 0.24<br>6 | 0.22<br>7 | 44.82<br>1  | 49.<br>5 | 47.<br>4 | 47.24            |            |           |           |                 |           |           |           |            |              |            |
|                  |              | 1.6         | 0.32<br>2 | 0.30<br>8 | 0.30<br>7 | 64.14<br>3  | 62       | 64.<br>1 | 63.4             |            |           |           |                 |           |           |           |            |              |            |
|                  |              | 0.4         | 0.33<br>1 | 0.33<br>8 | 0.31<br>3 | 65.93<br>6  | 68       | 65.<br>3 | 66.43            |            |           |           |                 |           |           |           |            |              |            |
|                  |              | 0.2         | 0.34<br>8 | 0.34<br>2 | 0.32      | 69.32<br>3  | 68.<br>8 | 66.<br>8 | 68.31            |            |           |           |                 |           |           |           |            |              |            |

**Table S.4:** The viability percentage ( $\mu\text{M}$ ) for compound **5** and erlotinib showing their  $\text{IC}_{50}$  on HEPG-2 cell line.

| ID               | Mwt          | ug/ml       | O.D       |           |           | Viability % |          |          | Mean Viability % | IC50 ug/ml |          |          | MeanIC 50 ug/ml | SD        | IC50 UM   |           |            | MeanIC 50 UM | SD         |
|------------------|--------------|-------------|-----------|-----------|-----------|-------------|----------|----------|------------------|------------|----------|----------|-----------------|-----------|-----------|-----------|------------|--------------|------------|
|                  |              |             |           |           |           |             |          |          |                  |            |          |          |                 |           |           |           |            |              |            |
| <b>HEPG-2</b>    |              | -----<br>-- | 0.54<br>9 | 0.56<br>1 | 0.58<br>6 | 100         | 10<br>0  | 10<br>0  | 100              |            |          |          |                 |           |           |           |            |              |            |
| <b>5</b>         | <b>533.4</b> | 100         | 0.19<br>2 | 0.18<br>1 | 0.21<br>6 | 34.97<br>3  | 32.<br>3 | 36.<br>9 | 34.7             | 8.3<br>3   | 7.3<br>9 | 7.0<br>7 | 7.5967          | 0.65<br>5 | 15.6<br>2 | 13.8<br>5 | 13.25<br>4 | 14.241       | 1.227<br>8 |
|                  |              | 25          | 0.25<br>5 | 0.23<br>1 | 0.26<br>4 | 46.44<br>8  | 41.<br>2 | 45.<br>1 | 44.23            |            |          |          |                 |           |           |           |            |              |            |
|                  |              | 6.3         | 0.27<br>9 | 0.29<br>2 | 0.28<br>6 | 50.82       | 52       | 48.<br>8 | 50.56            |            |          |          |                 |           |           |           |            |              |            |
|                  |              | 1.6         | 0.29<br>8 | 0.31<br>9 | 0.31<br>2 | 54.28<br>1  | 56.<br>9 | 53.<br>2 | 54.8             |            |          |          |                 |           |           |           |            |              |            |
|                  |              | 0.4         | 0.32<br>3 | 0.32<br>9 | 0.33<br>1 | 58.83<br>4  | 58.<br>6 | 56.<br>5 | 57.99            |            |          |          |                 |           |           |           |            |              |            |
|                  |              | 0.2         | 0.34<br>1 | 0.36      | 0.36<br>6 | 62.11<br>3  | 64.<br>2 | 62.<br>5 | 62.91            |            |          |          |                 |           |           |           |            |              |            |
| <b>erlotinib</b> | <b>393.4</b> | 100         | 0.13<br>6 | 0.12<br>9 | 0.13<br>7 | 24.77<br>2  | 23       | 23.<br>4 | 23.72            | 8.6<br>6   | 8.5<br>1 | 8.8<br>7 | 25.08           | 0.18<br>1 | 22.0<br>1 | 21.6<br>3 | 22.54<br>5 | 22.062       | 0.46       |
|                  |              | 25          | 0.21<br>5 | 0.22<br>2 | 0.22<br>1 | 39.16<br>2  | 39.<br>6 | 37.<br>7 | 38.82            |            |          |          |                 |           |           |           |            |              |            |
|                  |              | 6.3         | 0.25<br>4 | 0.26<br>1 | 0.34<br>4 | 46.26<br>6  | 46.<br>5 | 58.<br>7 | 50.5             |            |          |          |                 |           |           |           |            |              |            |
|                  |              | 1.6         | 0.32<br>1 | 0.32<br>6 | 0.31<br>9 | 58.47       | 58.<br>1 | 54.<br>4 | 57.01            |            |          |          |                 |           |           |           |            |              |            |
|                  |              | 0.4         | 0.39<br>4 | 0.41<br>1 | 0.37<br>7 | 71.76<br>7  | 73.<br>3 | 64.<br>3 | 69.79            |            |          |          |                 |           |           |           |            |              |            |
|                  |              | 0.2         | 0.41<br>4 | 0.42<br>1 | 0.44      | 75.41       | 75       | 75.<br>1 | 75.18            |            |          |          |                 |           |           |           |            |              |            |

**Table S.5:** The viability percentage ( $\mu\text{M}$ ) for compound **5** and erlotinib showing their  $\text{IC}_{50}$  on HPrEC cell line.

| ID               | Mwt          | ug/ml       | O.D       |           |           | Viability % |          |          | Mean Viability % | IC50 ug/ml |           |           | MeanIC 50 ug/ml | SD        | IC50 UM   |           |            | MeanIC 50 UM | SD         |
|------------------|--------------|-------------|-----------|-----------|-----------|-------------|----------|----------|------------------|------------|-----------|-----------|-----------------|-----------|-----------|-----------|------------|--------------|------------|
|                  |              |             |           |           |           |             |          |          |                  |            |           |           |                 |           |           |           |            |              |            |
| HPrEC            |              | -----<br>-- | 0.54<br>5 | 0.53<br>1 | 0.52<br>9 | 100         | 100      | 100      | 100              |            |           |           |                 |           |           |           |            |              |            |
| <b>5</b>         | <b>533.4</b> | 100         | 0.24<br>8 | 0.23<br>9 | 0.23<br>1 | 45.50<br>5  | 45       | 43.<br>7 | 44.73            | 50.<br>9   | 51.7      | 50.3<br>2 | 50.96           | 0.69<br>5 | 95.3<br>7 | 96.9<br>2 | 94.33<br>5 | 95.541       | 1.302<br>4 |
|                  |              | 25          | 0.31<br>1 | 0.30<br>5 | 0.31<br>1 | 57.06<br>4  | 57.      | 58.<br>8 | 57.76            |            |           |           |                 |           |           |           |            |              |            |
|                  |              | 6.3         | 0.35<br>4 | 0.34<br>4 | 0.35<br>7 | 64.95<br>4  | 64.      | 67.<br>5 | 65.74            |            |           |           |                 |           |           |           |            |              |            |
|                  |              | 1.6         | 0.39      | 0.38<br>8 | 0.39<br>4 | 71.56       | 73.<br>1 | 74.<br>5 | 73.04            |            |           |           |                 |           |           |           |            |              |            |
|                  |              | 0.4         | 0.43<br>2 | 0.44<br>4 | 0.50<br>5 | 79.26<br>6  | 83.<br>6 | 95.<br>5 | 86.12            |            |           |           |                 |           |           |           |            |              |            |
|                  |              | 0.2         | 0.51<br>1 | 0.46<br>9 | 0.51<br>7 | 93.76<br>1  | 88.<br>3 | 97.<br>7 | 93.27            |            |           |           |                 |           |           |           |            |              |            |
| <b>erlotinib</b> | <b>393.4</b> | 100         | 0.21<br>6 | 0.20<br>2 | 0.21<br>7 | 39.63<br>3  | 38       | 41       | 39.57            | 22.<br>7   | 24.9<br>8 | 27.1<br>9 | 25.08           | 2.22<br>5 | 57.8      | 63.4<br>9 | 69.10<br>9 | 63.466       | 5.655<br>3 |
|                  |              | 25          | 0.25<br>7 | 0.27<br>7 | 0.25<br>2 | 47.15<br>6  | 52.<br>2 | 47.<br>6 | 48.99            |            |           |           |                 |           |           |           |            |              |            |
|                  |              | 6.3         | 0.33<br>9 | 0.31<br>9 | 0.34<br>4 | 62.20<br>2  | 60.<br>1 | 65       | 62.44            |            |           |           |                 |           |           |           |            |              |            |
|                  |              | 1.6         | 0.37      | 0.37      | 0.37      | 67.89       | 69.<br>7 | 69.<br>9 | 69.17            |            |           |           |                 |           |           |           |            |              |            |
|                  |              | 0.4         | 0.43<br>3 | 0.44<br>1 | 0.42<br>8 | 79.45       | 83.<br>1 | 80.<br>9 | 81.14            |            |           |           |                 |           |           |           |            |              |            |
|                  |              | 0.2         | 0.46<br>6 | 0.45<br>9 | 0.46<br>3 | 85.50<br>5  | 86.<br>4 | 87.<br>5 | 86.49            |            |           |           |                 |           |           |           |            |              |            |



**Table S6:** IC<sub>50</sub> values of PI3Kβ and EGFR inhibition for compounds **4a**, **4b**, **4c**, **4e** and **5** over PC-3 cells

| Comp no.         | IC <sub>50</sub> PI3Kβ (μM) | IC <sub>50</sub> EGFR (μM) |
|------------------|-----------------------------|----------------------------|
| <b>4a</b>        | 0.7918 ±0.0318              | 0.4140 ±0.0025             |
| <b>4b</b>        | 0.4844 ±0.0289              | 0.5587 ±0.0215             |
| <b>4c</b>        | 0.5335 ±0.0525              | 0.3073 ±0.0259             |
| <b>4e</b>        | 0.9923 ±0.0042              | 0.3132±0.0008              |
| <b>5</b>         | 0.2612 ±0.0196              | 0.1812 ±0.0037             |
| <b>Erlotinib</b> | ND                          | 0.1344 ±0.0135             |
| <b>LY294002</b>  | 0.5254 ±0.0393              | ND                         |

Values are means ± SD, n=3, p value using independent t-test for the tested compounds vs Erlotinib and LY294002

ND= not determined

### Part 3: Docking studies:

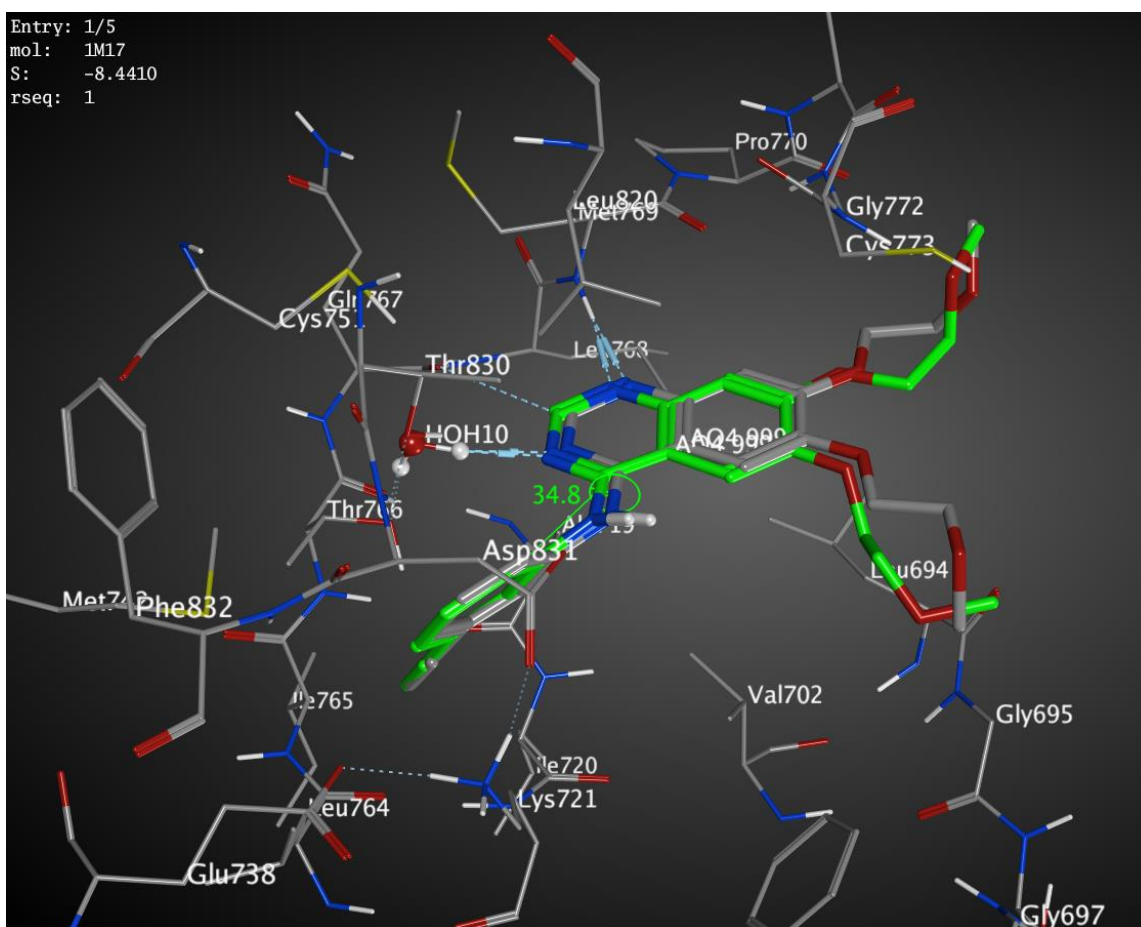

**Figure S.48:** Alignment between x-ray bioactive conformation of Erlotinib (colored in grey) and best-fitted docked pose (colored with green) within the binding site of EGFR tyrosine kinase. RMSD refine score = 1.254137

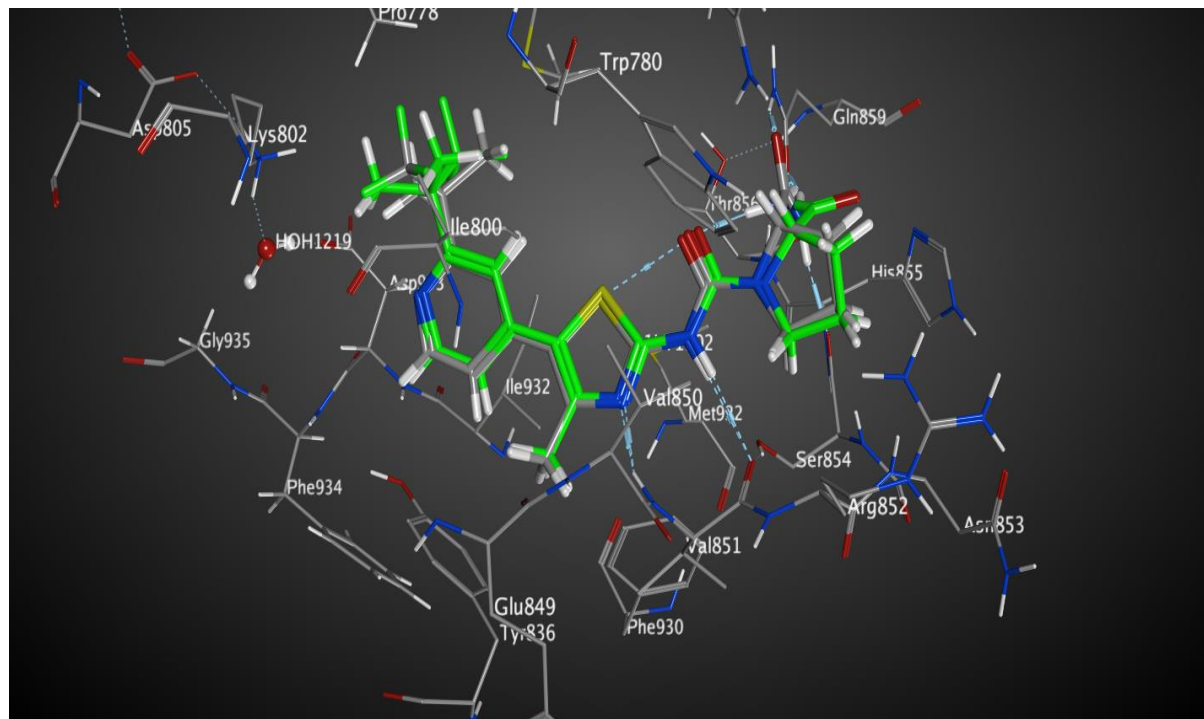

**Figure S.49:** Alignment between x-ray bioactive conformation of Alpelisib (colored in grey) and its best-fitted docked pose (colored with green) within the binding site of PI3K $\beta$  kinase. RMSD refine score = 1.862
